# Supplementary material for: Genome-scale transcriptional study of hybrid effects and regulatory divergence in an F1 hybrid Ruellia (Wild Petunias: Acanthaceae) and its parents
Source: PubMed Central journal article supplement (PMC5240417; doi:10.1186/s12870-016-0962-6), 2017-01-17
Supplement: 12870_2016_962_MOESM3_ESM.pdf [file 12870_2016_962_MOESM3_ESM.pdf]

**Supplementary Table S1. the sequences of all identified RMYB genes.**

**Part I. the nucleotide sequences of RMYB gene family.**

>RMYB1

GACATTCTAACATCCTCAGTTTTTAGTACCAGGCAAGTGGCTCAAGTTTTGAACAGTGTT  
CAATGAATAAAAAAGTTAAAAGCACACCCACCTTCACCTTGATGGTCAGCAAGAAAAACAA  
AGCTATACAAAAACACGCATAAATTACATAATTTATGTATTATTACAGCTATAATGTAA  
TCTATCTATCTAACGAATAATGAGTTTTCTTCAGCCCCATTCTATCAGATCAGGATCACA  
ACCACTAGCATAATCAAACACAATTCTACTGATTCACAAGCTATCAGTTGTTACGTGTAA  
TTCAAAAACATCAAATTATCTTGGCATGGGAAAGCTACAACCTTCAAACCCCCACGGCC  
GTCATGACTAGGAAGGTTGGTTGGAGCAGGCATCGGCAAGCTATCCATGGCAGTTGTGAT  
ATCATGAATGCTGGACCTCTTTCGCTCTTCTCCCTGAGGTGTGACGGAGAAAATATTT  
TTGAGCATGGCTAGCCACTTGTGTTGGAGTTCTTGTGACCACTACATTCCTGAAATGCT  
TCTCCAATCACCTTTGCCATATCTATCCAGTCCAATTA AAAACAACCTGTGCTCATCCTC  
CGTCCAAGGTGTCCCCTTTTTCTCTCAGCATCGCGGCTCCGACTGCCGGCGTTGGGTGA  
TCCGAATGAAATCTGACCCGAACACTGGAACCTCGTTCGCACTCAATTGATGTGCAACC  
ATCCGAATAACTCGGCAGCTCAACCCGGCCCGAATCAATCTCGGTTATATCGTGAAGAAG  
GGCTTCATAATGCGCTCTGACATCATCCGGCGATTTGCCAGGGAGAAATCCGGCGATTCT  
CTGCCAGCGGTCGTC AATCCCCTCCGGGAATCAACCAAAGCCTTCTCGAAAATTTTGTC  
CTCCTGACGGTCCATGGTGGGGCGGGGAATCAGGCATGTGCATCCACCGATTGCAGGC  
GTAGATTTCCATTA AATTGGTGGGTTTTTGGACTTGGTTTCTTGAGGGGGTTTTGTTTGG  
TGGAAGAGGTTTTGGAATTGGGGACTAGATTGTTGAGGGGAGGGTTTGTAAATAATCTGTG  
TGTAGTGTGTGTAAGAACACACAAGGTTAGTGAGATGTTTAATTATGAGGGCCGAATGA  
AGCACCAGCCCGTTATCCTTCCACTGCTG

>RMYB2

TCCACCACTATTTATTTTAGTTAAATTTACAGAGAGTCACCACATGTTTATCAAACTTTA  
ACGATCAGGTTTGGGAACCAACATTTATGTCCATCGGATAACTGTTGTTTAGGATTAGG  
GTTTAATTTCCATTCTGTCTCAATAGTTTTTCTTATTCCCAAACATGACATAAAGTCAAT  
AACCATATTTGCCACAAAAATGTAACCCAAAAATTTGCAACACATCATATATAGTGAAT  
GACATACATTCAATAATATAATAATAATAATAATAATCCAGTCTTTAACATTTACTCTCC  
ATGCATGCAATCAACAAAAATAAAAATTA AAGGAAAAAAAAAAGAAAAAACAGAAGCACAA  
TTAATTAATTACTATGCCCCCTTGACAATCCTTATTACCTTTTTTTTTCGGATTTTAATAA  
TAAAGCTCTCTATTTACACCCTACCCCTCCCTATTATTTATTTTATTGTGCCAAAAT  
AATAAATAATATAAAAATTAACCTTCGGTAAAAACGAAAACTAACCCTAGCTTCTGTAA  
CTTTTTCACTTTTTTTGACATTTTTTTTACCGCCGAGCCGCTGTCGTCGGACCCATCT  
CCGTTATATCCGCCCACTTGCTTCCCTGCAGAACATATCACGATTCCTGCGCGGCGTTGG  
CCACCGATGAGTGCTGCTTGTTCGCGAGAATTTGAAACCCAATCCCTCGTCATCGTCGT  
CATCGTCGTCCTCGTCGTTGATGTTGTGATCGTCGCTTTCGTTGTCGCGATTGTCCTGAT  
CCTGCATTGCGGAATCGGGGAGTTGTTGTCTGTGTAGATTGGGAATTGGCCACTGCTGCT  
CCGGCTGCGCCATTATTGGCACCATGGGGTTGTTATTGTTGACCTCCTTGGCTCTTTCTT  
TGTATATGGCTTCCAGCTGGTGGAAGTAAGGGCACGTCTTGGCGTCATCCGGCCGCTTCT  
TGTGCTTTCCTCACCTTCTTGAAGTACTTGTGATATTCTCCATTTCTCCTTGCAAC  
GCTTCGAACCTCTGTTGTATCCAAGCTTCGCCATGGCGGACGAAATTTCTCCAGAGAG  
GGCCTTTTGGCCCGTTATCTTGGTATTTAAATCCATGCTTGTTCGTAGATTAATTAGCG  
CTTGAACCTTCGGCTTTTGGCCACCGTGATGAACTCGCGGCCGGGGAATATCCGGCCACTT  
CTCCGCCGTTGTTGTCCGTTTTTGAATTGTTAAATACTTTCGCCGGTGGTGGCACTGTAA  
TTGGAGCTGGCGCCGGTTGTGTCGTTGGAGCTGGCGGGGCTGGTGGAGGCTCTGTTGCT  
GCGGTGGCGGAGGAGGCGGCTCCGCCGCCGCCACCGCGGGATCTGCAAATTGTGTT  
GATCAGTTACTTTTTGTAAAAATGCAATCACGGCGGCGTCTTTAGCGGCGGCGATGGATC  
TCTCCTGGACTAATAGATCATGTTTCGCGATTAACCTCTGGCGATTTCTGAACGCGCCAAG  
CTTCTTCCCTCGCCATTCTTTCGCGCTCGCGTTTCTCCAGTGAATCCAGGAATTTCTTCT

GCAATTCCTCCTGTTTCTGAATAACGTCTCGCACCAGCCTGTGGAAACAATCCTTCCATT  
TCCTCTTCCCTCCACGCCGTCTTTGGATATCCTCGTCGGACGAAGTCGACGACGACGTCG  
AATCCGACATCAGCCCCGGGCGGATGCCTGAAAAGTTGAGCCCTTGC GGAGGAACCGAGC  
TGTTCCCTCAGATGCTGCATTAGCGGCGGCTGCGGGCGGCGGCTGCGCGATTAATGGAGAAG  
AATCGATAGGGATTGAGGCGGCTGCCTGGGGAGGGACCACGCTTAAAGGCGTCGGACTAA  
TTGATGAAACAGTAACATGGGCTGGCATTGTTCGAAAGGGAAGCTGTGGCGGCGGGGCGCG  
GCGGGGTGAAAGGATTAGGCGGCGGAGCGTTCTCCAAGGCTTCCAGTTGATCGAAGAATC  
GGTAGGTTTTGCCGTCGGATTTTGC GGCGGCGGCGGCTCTTTGGTTTCGCTTGTGGTATTTGT  
ACACGTTCTCGAATTTTTCCCGGCATT

>RMYB3

TGCTTGGCTATTGATGCTTTTGTGCTGTTGCTGTTGCTGTTGCTGCTGCTGCTCCCTTT  
CTTCGAGTCGAGACTCATGATGTAGTCTGCAAAGCAGAAGTAGGTATCGGAGACTTATT  
CTTGCATCTTCCATCTGTAAGTTTCCCTCCTCTTTGTTGTGTTCCAGTGATTCTTGATGGT  
ATTCTCAGTCCCTCCCGTGAAGCCTTTTCGCAATTTCTGCCCATCTGTTCCCGAGCTCTGC  
ATGAGCCTCGATGAGTTTCTTGTCTTCCCTCCTCCGTCCAATCATCTCTTTTTATATCAGG  
CTGCAAATGATTTCTCCATCTCTCTCGGCATTGCTTGCCCGTCCCTCCCTTCAGCTTTTG  
CCCCATGAACGTCCATCTTTTGTCTCATAAATCTTCACCAGATTGACCAACAATCTGTC  
CTCTTCGAGGGTCCACAATCCTTTGACAGGTTTCGACACATTTGAGCCTCCGTCCGAATT  
GTCAGCGTTACAACCTTTTTCTTGTATCTGTGCTATTTCTTTTTAAACAGCCAAAAGCATC  
AGCACTCACAAAAGAACTTTCATCTGTGTTACATACTCAAGTCGCATAAAAATCAGGGTA  
GTTCAATGCTGCCTCAATTCCATTCAATGAATCTACCTCATTTGGGAAACTCAAGAACC  
ATCACCTTGAAATTTGTCATGTTTCATATCAGTGATCTGGTTCCCTCTCCTTGGATGTG  
CTGCATGACCGCGCTAGAGTAGCCATTTCCCTCATAAGGCATGTACTTGTTTAGAAAGGG  
ATCAAAAAGGATCAATGGGATTAGATTGCCTATCGATGATTGAACTTAAAGCCAATTCATC  
AAGATGAAGGATGTCTTGATTAGATGACAAGGGATTGCTAGAGCAAATATTATGAATGGG  
GAAGGATGCAGGGAGAGGGACATTTTGGTCATTTTCAAACGGTGTGTTGTAGGACTCCAT  
TGGAGAGCGATAGAAGTAATGAGTGACAAGAAAGGGAATGGAGTAAATCCCTGACTTAGG  
CCTTGGTTAAGTTCATATTTATTAAGAGAAAATATAAATGCACTAAATGTGTTTCGAGTA  
CATCTTGGCCGTCGATTTGTGGGAGGTGATCCGAGGATCCGAAGTTCATGTTATAGGGAT  
AAGATTAGGTAGGGAGACTTGAAAAAAAAGTCGTGTTACAGAAATCAAATTTCTTTAATC  
ATTACTCTTACAATTCGTAATTTTATTTTCTTCGAGACACATGAAATCCAAGTAGTGAA  
TTTTCTCAATAAGTCAATTTGTTTTCTGCTTTTAAAATATGGCCACAAGAAAAGAAAAGGT  
GCACTTTGTTAACATGAGTAATCCTCACTCTTTTTTAAAGCCATTCTTCAACTTACTCATA  
TTCGGGGGTATAACATTCTCACCCATTTGAGAACGCAATATTCTCGTTGTGCAAGAGGCC  
TTGAATTTTGCCTTGTGCTTAATTGACTGGTATTTCCAGCATAGTGCATGTTGCGGG  
TTTGCTTTGATATCATATGTATCCCGCCAAGGAGGGAGAAGTGATTATTAGCCTTTTGGG  
ATTGAAAATTGGCCCCACAAATCAACACGAGTCGTTTTTTGTTACCTATCGCACAACTA  
CTTGAAGGCCAACATGATTAACCACATAGT

>RMYB4

GCCAGGCCAAGAAATTCAAATTTGAACAAAACAGGAAAAAAAAAAAAAGTGCAATTTTCTA  
CAGTATAATCTCATTCTCATTCCCATCTTCCAAATTTTTGATTTGGCAAACAAGATCAT  
TCTACATAAAAAAGGAAAGGAAAAAAGAAACCACAATTTCAAGACAGAAAACCCAAATTT  
TGGGGATTTAACTCACCAGCATTTTTCAAAAATTTGGATTTTCTGTCCAAAATCGTGTAC  
CAAACCAAGAAAATTAAGTGCCGAGAATCGAGAATGAGCTTATACTTATACCCCCAAAAA  
TTGCAAATATTTCTCAAACCTCATACCCATATCATATAATAATTCCCAATTTCCATACC  
AAAATGGAAAAAACCCTAAATTTAAAATCCTAACAATTCAGGAATCAAACAAACCCTGGA  
TGCCTTGATCATCAAACAACCACTTCTCCAGGGCCAGCACGCCCTCCGGGTGCGGTTTGG  
GAGACCCAGATCTTGAGAAATCATCCGACGACAGGGAAGAATACGACTCAAAGGATTCAA  
ATCCAAACAATCCCTCCCTAAATCAGCTCCACCAGCGACGACTTCTTCGGTGTGTCAGC  
TGGAATAATTATAATTCGAAAATCCTCACATTTGGGGGTTTTGTTGGCCCAATCCTTGA  
GTAATCTTGCATGTTCTCAGTGCTGGATGCGTACGACGTTGTCTGAATGGGGTTCGGGG

CGAAATTAGGGTTTGTTCATGACATCCTCATCGATGGATTCCGAGGTTGAAACTGAGAGAG  
CATTGGCAAGGGCTTGTGGCTGTGTGGATATCCGTTTGCAGCTTCTCTCCCACTGGC  
CACGCGAAATGGGTTTGGAGGAGCCGTTCTCCGTGGGCCGGTTGCCCGACCCGGGTTGGA  
TCCGGTCCAGCTTCTTCTCAAGTGAGTGTCCAGAAGTTTTTGTATGTCGTTGTCCGGTTC  
TTTCTGGGAGGTAAGAAGCTATGGCAGCCATTTGTTGCCTAGCAGGGCTTGAAGCTGGA  
TAATCATTTTCTTTCATGATCAGTAAAGGTCCCTCTTTTGATTCCAGGCCTGAGGTAAT  
TAGTCCATCTCAGTCTGCAACTTTTGCTGCATCTTTTCAACCCTGTATTGGGAGGAACAG  
ACCTCCAATTTCCAGGACCATGCTCCTGAACATAGGACACCAACATGATGTCTTCTTCAG  
GAGTCCAAGGGCCTTTCTTCAACCCAGTTTATCACAGCAAGGTGGCCTCCCCATCAGAA  
TTCAATTTCAATTTCTTTCAATTTGGGAAATTAGGGTTTCTTGATTCTCACTCTTGGC  
TGTATTTTTTTTATTTTTTCAAAAAACAGGAGTTCTTGGGAAGGGATGAGGATGAGACAA  
TGGTCGTTTGGGATCTGGATATATATATATATATATTGTGGGGGGGAGGGGCTGACCTAA  
TTAATTATTAATTAAGTGAAGGAGGTGAGGAGTAGAGAGAGGAGTCAAAATGCAAT  
AAATTATGAATGAGAGTTGATGTTATTTCCCTTCCATTCCAGACTCCATGTCCCAATGGA  
TGAGGATTGAGGAAGAAGGATTCTTGCTTGCTTTATGGTAGCTATCTCTCTCAGTCTCTC  
AGGGCTACAAAAGTCAGCTCAGATCTCAGGACACATACAGCAGTGGAGTGTGTGTTGCTT  
TGTTTGTCTTCG

>RMYB5

CTGGATAGAGAGGTAAGCCCTGTGCTGTCTTCTTTGATTCTAGTGTTC AATAGTTCT  
TGATTTTCATTGTCCGTACGTCCAGGTA ACTCAGCAGCCATTCGAGCCATTTATTTCTTA  
GCGTGGCGTGAAGTTCAATTATACGGCGCTCCTCCTCAGGAGTGAAGGCGCCTTTCTTAA  
GATCTGGTCTAAGGTGATTTGCCACCTCAAACGGCAACTCTTTCCACATCGAGCAAGCC  
CGGAGTGT TTTTGA ACTGCATTCCAGTTGCCCTCCCCGTGCTTGTTAACATATTCAATTA  
AGATTGCATCTTCTGCTGAAGTCCACGGGCC TTTCTTAAAGTGGACCATTTGGGCCCGTTG  
TTGTTGTTCCCTCCACTGTTGGCATCATCAACAGAAGGTGAATCGACACCGCTGCCTGCCA  
TTCTTTTCATCACTTTCGCTTGTTATACTCATCTCCTTTATCGTGAATCTTCCCCTGAAAC  
CTAACAAATCTGCCCTCAACAAAAGCAAAATAAAAAAATCGTTTGAACAAA AATTGGA  
AAAAGAAAATAATGCTAATTCTCTCAGGGGAGAATCAGACAATGGAAATTTTAGAAACCA  
TGGGCAAATTTTCTGTGGGCCAAAATTACACTCGCGAACACGACAAGAAACAGCAACACC  
AGCCGAAATTTATCGAAGGCCACACAAGAAAAAATCTGGAACCAAAAAATGGATTCAAAA  
CACTGAAAAACAGAAT

>RMYB6

GGCCGCGCCGAGGAGCGATCCTTGGCCGCCCGCCACAGTGGCCGCCCGCTTCTGGGT  
GGGAGTGGGGTGGGTGGGTATGTGCACAATGATCATTTTTTAAGAATACGCATATAAATTG  
AGGGTTAGGTACAGTACTTTAGATTTTCCAAACTATAGAAGCTGCAAATATTCATCATAG  
ACTTTTTCCAGCATTTCTACATCGTCGGAGATGGATTCTGAGTGGGTGAGCACC GGAATC  
AAAGCACATTCCCCGCCGTCGAGAAAATGGGCTTCTTACCCTGTCACCATTGTACTCCA  
AAGGTAGCATCCTCTATTTCAAGCAGTGCCGGCCACTCCCTCCGTACATCCTCCGCTGCC  
TTGTCACTGCCACAAGACGTGCCACTGGCCAAGCTGTTGTAGCTGCCGGTACAGGAGAGT  
TCAGAGCTGACTCTTATCGGCTTCGGAAAATACACTCGAGTCTTGTTTGGAGTATCATTC  
TCCTTTTCTTTCTGCGAGTCAATGCATCATTGTTGTGGCCTCCGGGGTCCAGTATCTTC  
TTTTGCTTCTGCTTCCGATCTTGGTTTTGTTTTGTTCTATTGATTTCGAGTTTGGACAGC  
TCCCTGGGGGGAATGGCGAGGGTTATCGCAGCGGCACCTTTCTTGTGGAGGTGCGTGTTC  
CAGTAGTTCCTGATCTCATTATCTGTTCTACCCGGCAACCTGCCGGCGATTAGGGACCAT  
CGATTTCCGAGGAGGCGGTGCAACCGTAGGATGAGATCTTCTTCATCTTCCGAGATGTTT  
CCTCTTATGATTCCCGGACGGAGATAATTCATCCACCTCAATCTGCAGCTCCTCCCACAC  
CTCAATAGTCCGGCTTTATTGGGGAGGGATCTCCATTGGCCCTCACCATGCTGTTGAATA  
AAATTGGTGAAGAAAGAGTCTTCCATGGCAGACCATGCGCCTCTGTTCAATCCCACTTTG  
GAGCAGCAAGGAGCCCTTCCATTTCTAGATTTCTAAGGAATTAGAGATGGGAGTGAAGG  
CACTGCATACAGCCTC

>RMYB7

ACTAATTTTGTAAATGTAAATGTAAATTTTAAATTATTATTATTATTTTAAAGATCAAATTA  
TTAAAAATAATATAGTATTATAATTATTAACCAGCTAATATGCATGTAAATGGAAAACA  
AAAAATGAAGTACGTCCTAAATGAACAGAAATGTAATGTCACACTCCCATAGACAATGTA  
CAGTGTACAGTCATAATATTAGTAATCTATAATTTGATATATCCACATATACTCTTTAAA  
ATAAAATAAAATAAAATAATTCCTCATCAGTTAATAAAGTAACAATATTCAGGAATATCA  
CAACGAACGCTACCACTACCATTCTCGTAAAATAATTTTATATATATAAAATATTGTTAT  
TAATTATACATCATAAATTATTTATCTCTTTTTCTTTTTTTTTTTTTAAAAAAAAGGATC  
TTGATCCCTCATCCCAGAATCCTCTTCGACATCATCACTTCATCTCCAAGCTTCTGTAAT  
CCAACAGCCCAGTTTTCAACCCCATAAAATCATACCCTGAATTGCCCCACGGCCGCCGC  
CGCCGTCTCCGCCGCCACATCTGCAATCCTTGCTGTTCCGAATTCCCAGCCTGCAGGCGA  
AGCACGAATTCGCACTGTCAGTGTCCGATCCTCCAGGCGTGGCGAATCCGTCGGCGTCT  
GGCAAGGCAAGCTGATTCTGAGCTCCAGGTTCAAATCAGGGCACCGCTGATCGGTAGCTC  
CCGTCGATCCTCATCTTTTCTGATCACAATGATTTTCTGATCTTCCGATTCTCTCGAAC  
ATCCACCGGAGAACGAAATAGTCGTCGTCGTTGTTGTTTTTAGGGTTTCCCTGTCCGCCG  
CCGCTCATTTCATCGGCCGGTGAGTCGTCGGATCGATTCCCCGGCTCAACAATTTCTCTC  
TGATGTGCGTGTCCAATAGTTCTTGATTTTATTATCCGTCCTCCCCGGCAGCCTCCCGG  
CAATCAATGACCACTTGTTCGAAGGAGGCTGTGGAGTTTGATAATGACCTCATCTTCTC  
CCTCCGTGAAGTTGCCGCGTTTGAGGTCCGGCGGAGGTAATTGATCCAGCGGAGGCGGC  
AGCTCTTCCCGCAGCGGAGGAGGCCGGCGGCTTTGGGCAGGGAGCGCCAGCAGCCTTCG  
CGTGGGCGCGTATATAAGCGACGAGACGGTCGTCCTTCTCCTTGGTCCAAGCCCCTTTGT  
TTGTATGTGCCTTTTACAGCAAGGAGACCTTCCATTATACCCTTCTTTCTTCTTCTTC  
TTCTTCACTGTAATACTACTCTAATGTAATTATAATTCCTGTCAAGACTACACCTTTACA  
CACTCTTTATGTGTATATGTATACATGTACATAACAAGGATTTGACTGAGAGGAGGG  
TGTGAGTTGGTAAGAGAGACGGAAATTTGGATCAGGATCTGATAAAGGGCCGCA

>RMYB8

GTTTTGATCATCATGTTTCGTCCCATTTCATCAAGAACGAACTCCCATTGTGACACCAACT  
CCGTTATTACAGCTAATGAGCTCCTTAATTTCTCGACACTATAATCACTTGGCAGCCA  
CTGCTACTGATCAAGAGCTTGTGATCTTCAGCACCATCCCCTTTAAAATTTCCAAAATTG  
CAACCCTGGAAACACGATTTTTTCGGATGAACTGCAGCTGGGCTGATCCCCTCCATAGATG  
AGAGAATTACAATTACAATTCGACGACGAATTGGAAATTGGGTGGAAGCTGGGAGACATG  
GCCTCAAGCTCGACCCAGTGGACAAAGTCCTAATCTGGGAACATGGGTAAAATTAATA  
TAACCACATTCATAGGATGATGGCATTGTTGGGATTATTATTATTACATGGCAATAATGGA  
CAAGCAGCTGCAGCAGCCTGGTGAGTATTCACCATTCCCATCAGTTTCTTCTTCAGCTTT  
GTGTTCCAGTAATTCTTGATATCATTGTCCGTCCTGCCTGGTAATTGTGCTGCTATTATT  
GACCATCTGCTTCCAATTCTGGCAAATAAGCTACAAATTAATCTGTCTTCATCATCAGAG  
AAATCTCCATGCTTGATGTCTGGCCTGAGGTAATTAAGCCATCTCAGCCTGCAGCTCTC  
CCACATCTCTTCAAGCCAGCTTTTTGGGGGAAAGTGATCCAATTGCCACCAGTACCATT  
TTGTGTATGTAATCTTTCAATTTGGCATCTTCTTCAGGGGACCAGGGGCCTTTCTTGACA  
TTGGCCTTGTACAGCATGGAGCTTTCCTTCCATTTTGTGGAGAATTTGGTGAAGAGGCCAG  
GGGACTTCCAGTAATTTGTCTTTTTATAGGGCTTAGGTTAGCTTCTTGGCTTCGGAG  
TTCGGACAAGATGGTATGGTACTCTTGGGCAGACACACGCACATG

>RMYB9

TTTTGGGATTCTCATTTTTGAGTTGATGACTCAAGTAGATCACTCAAGTTGGAGTTGGAGT  
TGGAGTCGGAGTTTGTGTTTGTGTTTGTGTTTGTGTTTGTGTTTGTGTTTGTGTTTGTGTT  
TCCTGTAGCTCTCTTTCATCAGTGCACCTTTCTTCTTACTGGCTCACAGTTTTCTCTG  
GAACTGCAGCTGCAACTCGTTCCAGCGTTGAGGAGTTTCTTTGGAAAGGTTTTCTCAGAG  
CTTGGACTAAACCTTTTTCTTGTGCAACAGACCATGAGTCTTGATCTGAACACAAAGCAG  
TTCCATTAACAGCATTGCTGCTGTCTGACAAATTGCCAGGAACAGAAGATTGCCCCATAG  
CTGCACCGGCATTAGATAAGCCCAGCCATCCTCTAGTTGAGAGAGGTTGAAGCAATTG  
CTTGTGCAGGTTTCTTTTCTCAAGGAAGGAGTCAAAGGCTTTAGCAGAATCAGGCTTTT  
GCAAAGAAGTGTTTTTGTAGCCTTCAAATCTCCTCTACTGATCTCCAGAGCCAATAT

ACTCAGATATCACTTCCCACCGCCGGGAAGTTCCTTTAGGATATTTCTGCATGCCCTTTC  
TCAAAAGCTCAATTTCTTCTTTACCCCAAGGCTTTTCAGCTTTGTTAGAAACCTGTCCAT  
TCATATGAATGCTGGTGGAGCCATTTTGCAGTACATTCTTCTCATCTTCCTTCTTATCCT  
TTGTTTTGTGATTGGATTCAAGTGTCTCTTTGAGAAGTTCAGCTCTCTCGAGACCCCTCCT  
TTCTTTCCAATTTTTTCACACAACCTTACTAAGCTGGTCTTTATCAAGTGATGAGCACAGAC  
TCTCCACATCGTCATCAGTGAGATCAAGCAAACGTTGAGACAAAATAGGCGTTGAAAGTG  
TTCTTAGACGGGTCCGTTCCCTCCGGAGTAATTTTTCTCTTTTTCTTCAATTTCTTTT  
GATTTAAAGCAGCTTCAGCTGCTCTTTTTCTCCTCTTCTTTCCGCTTCCTTTCTCCT  
CGGCAATCCTAGCAGTTTCTTCTTCTGCAATCTTTTGGCCATAAGTTAGCTTCCTTCT  
TTCTTTGTTTCTCAGCTTTCTCCTCCTCTTTCTTAAAATCCTAGGATCCCTTTTAT  
AGGCATTATCAACAAGAGTACGTATGCGTGCACCTTTCATCTTTCCGTGCCTTCTCTGACA  
GTTTTAAATTTTGCCTTTCCATCCATCTCCTGTGATCTCGACCTTCAGCTTGCTCAAGGT  
CATACTCATCAGCATGTGGAAATTCTCTCCAACTTTTGAAGGAATACCAGAAATTATAAA  
AGCTATCCACTTCTTTGATGGGCATTTTATCATCCCCAAAGTAGGAATAGGCTGGGTTA  
CAGACCACCGCCCATTCCTCACAAATGCAGGGCCAAATACCTTGAAGAAATCCTGTGGTG  
CACAATCATAAGGAATTTTCATCATCAAACCTCATCCGTGGAATCATAGATTCTTCTCTTCA  
AAGGATCAATCAACACTTCATATGCTTCTTGAATTGCTTTAAAATGGCCCTCAATCTCAT  
CCTTCTTGGCCTGCTTAGCAGTCTCAGTTTCTCCGCAAGCAAAGAGCAGCCTGCTTGT  
CAGGATGATGCCTCAGAGCAGCCTCTCGGTAACCTTTTCTTATCTGATCTTCTGTTGCAA  
GATACCTCAGATGGCTCAATCCTAGCAGGGCATAATGGTCTTGTGCTTCGCTCCCCAG  
ATTTTTCTTTCCCTTACTTCCATACGAATCTGATGATTCTACATAAACATGTTCTTCT  
CATTAGGAGCACCCCTTTCCATCATCATCATCGCCTGTATCTGCTTCCACACAGTGGCCTA  
CCAACCTAAGAGCAGCAGCATTAAACGAATGCCAGCAGGCTCCAGGTTTAAACGCCTTGA  
TCGGAAGGCTATTAGAGGATACATAGATTGGTTCACCATCCACAATTTCTCGTGGTAAG  
TAATCAGCTGTATGCTTTTCCAGAGGCCATTGCAACTAATAAGCCAACCTAGGACAGGAT  
CCAGAATCCAGCAAGCTTCCGATTAATGCGGAGAGTGGAGAATCTGATCGATATTAGTT  
TGGCATGAATCAATCGCGATTCCGCCTCCGCCGACGATGATGGTGTGATGGTGAAGGATGGA  
TTAGAGCTAGGGTTTTGGTTAGGTTTGGCTGAACGGCTTGTGCACAGGGCGAG

>RMYB10

GTTCTTGATCTCATTGTCAGTTCGCTTTGGTAAATATGCTGCCATTGCGGACCATCTATT  
GCCTAACAGAGCATGTAGTCGAATAATGGTCTTCTTTCATGGGAACTGAACTTCCCCCT  
CTTGATATCAGGTCTCAAGTAGTTTGTCCATCTCAGTCTGCAGCTCTTCCCAATCCTCTC  
CAACCCTGCTTTAGCGGGGAGGGACCGCCAGCTTCCATGGCCATGTTCTGAATATAAGC  
AAGCAGCTTTTGTATCTTCCCTCCCTTGTCCATAGCCCTTTCCTCAACCCCACTTTTCTATC  
CCTACTTGGCCTCCCCATTTTCAAATTAGGGTTTCTTTCAATTAAGGGCACAGCTTTAG  
TTTACTCCAAATTCAAATTTGTGGG

>RMYB11

TTAATTAATAGTCTCAAATTTCTCTAGAATTGACAATAATAATTATGAATGTCATTGAA  
TTTAAAATCATTTCGCCTCTATTTTGTGCAATCTAAAAAAAATATCTTGCAATGGGTAT  
AATAACATTGGTGGGCTAGTCATGAACTGAATGTGCCTCGGGTTCGTCAAATGCAGAAGC  
ATCCCAAAGCCACGGCAACGGCGCCATGTTCTGGTTCGTGCAGCAATCCCAACCATCCATC  
GTCGTCCAACCTCCCATGATCCCATATTTCTTCAAAGGGCGAGTTAAAGTTCCATGGAAT  
TGGGGACTCAATCGACCTCAAGTTCCAAAAATCATCGTCTTCAATATTAATACTACTACT  
AGGAGCCGAAGAAGAAGAATATTCATATCCGGATGAAGTGCTGCAGCAATGCTCGACGAG  
ATTCTCAGTTGCATTGCCATTGCAGGCTCCTCTATTCTCATCCAAATCCCCGTTGCTCCC  
CTTTATAGTTGTGTCATCCATGAAATGATTTTTGTACCCACTGCCTCATCAATTAACA  
GGTTGCACTAGTCATCGTGTAGTATTCGTCTTCTTTTATCATCCAATTTTCCAGACTG  
TAGTAGTGTGGTTCGTTGTTGCCTTGTGGCGATGATCATCGTGTGTAAGTATTGGTTT  
GCTCGAGGATGATGCTATTACTTGTTCCTTTAAATCAGGGTTGGTTGTCTTTTCTTACA  
TGGATCATCATCAACATCCACGTCATGGTTGACATTTGTTGCTATTACGGCGGGCGGGTGA  
TTTGACCATGTTATTATCAATACCATGTATCTTGAGATGCTCAAGTGATGATAGCGATTG

CCGCCGCTTGCGGTGCATCGTGTGGCTTTGGAGGAGGCGGTGGTGGAAACAAAATGTCCG  
AAAATAACTGTGTATTTTTCTACTCAAATGAGAGTTCCAGTAATTCTTGATCTCGTTATC  
CATTCTCCAGGTAAATACCCCGCTATTAAGACCACCTGTTTCCCAACGAAGCATGGAG  
ATTAACGATGGCGTCTTCTTCTTGAGGGTAAAATTGCCCTCTTCAGATCGGATCTCAA  
ATAATTTATCCATCGCAGTCTGCAACTTTTTCCGCACCGTAACAACCCTGCATTCTTGGG  
GAGTGATCTCCAGGCGCCTTCCCATTGGCCTCAATATACTTTGTAAGTATTTTCATCTTC  
TTCTGCAGTCCACCTCCCTCTCTTCAAACCCACTTTCTCACAGCAAGGTGTTCTCCCAT  
AAAATTATTATTTTTTATTTATATTTAATTATTATTTTAGTATTCAACAACCTCAATCAC  
ATCACATATGTATAGAGATAAATCCTGATGTTAGAAACAGACACATAATTAGTTATATTG  
CAAGAAATGCATAATGTACGAGGGCACACACATGTATATATATATACTGCACAAAA  
AGAATAAAAATAAAGACGAGAGAGATGTATATGTTTTGATTATTAGTAATAAAGAAGAAA  
TGAAATGTGAAATGGGT

>RMYB12

CTGGGTATTCCAATAGTTCTTTATCTCATTGTCTGTACGTCCAGGCAAATGTGCAGCCAT  
CCGAGCCCATTATTTCCCATCCTAGAATGAAGTTCAATTATTAGCCGCTCTTCTTCTGA  
GGTAAATGCTCCTTTCTTCAGGTTGGGCCTTAAATGGTTGGCCCATCGTAAACGACAGCT  
TTTACCACACCGTAAAAGTCTGTGTGTTCTGGACAGCATTCCAATTGCCTTCTCCATG  
TTTTTTCACGTATTCAACCAAGATTGCATCCTCAGCAGATGTCCATGGGCCTTTCTTAA  
GATAATTCCGCCATTTGAAGTTCCACCAAAATTATCACCATCATTACTCACAGGTGAATC  
AGCAGAGAGCACTCCATCATCACTGTCATTAGCAATGCTGTGGCCCATCATTCAATATGT  
GCAGTGTGTGAGCGTGTGGATATCAGAAAGAGAAGAGGCAGGAACCTTATACT

>RMYB13

AGCCGCAGAGGAATACGGCTACGTAACACAAGTGTGGGTGGAAATTTGAGGTCAAGAAA  
ATATTTAGAACTAATTAACATCCAGAATATGTGTTAAAGAAATTGCGTTCCAAGAATA  
TACCGACGTTAATGCCGTTAACCTCCCGGCCGTCGAAAATATTTTTCCATCTCCTCCCTA  
ACCGTCTCCTGAATATATGTACGAAGTTCACCCGAAGTAATTTCTTTTACCTCGCTGACC  
CTACCCGGTAAATCCTTACTCTTGCCTGTTCCGTCGGAATATTCGATGAAGAATATGCC  
TTTTACTGTGAGATAAACCGGTTCCCGGCAAACGAAGAGTCAACGCCGTCACCGCACGA  
TCAGCCTCTTCGCTGTTGCCGTTGGCGGCGGCCTGCCTCCGCCTGATTTACCGCCGCC  
GTAGGTTTTACAACCTGGTATCAACGGAAAAAGAAGTTCACATAATCGCCAGGCTCGGAT  
TGACTCCACATCGCCAATGATACGTCTCCGATTTCCGATTGCCGCAAAACCTGCGGCGGC  
CGCTCGCCAACCTCCGGCTCTGGCGGCGCTCCTCGCTCTTCGTACTTCCGCTTACAGATTG  
GAATTCCAGTAATTTCTCACGGCGTTGTCGGTGCGTCCGTTGAGCATTCTCGGATAGTC  
GCCATTTGTTGCCTAACTCAGCGTGCGCCCTCACAATAATCTCCTCTTCTCCGGCGTG  
AACGGACGGCGCTCCACCTCCGGCGAGAGCTGGTTGCACCACCGCAACCGGCATGACTTC  
CCGATCTCCCGGTGATCGACTTGCTAATCTGAGACCAATTCCTCGCGCCGTGTTTCTTC  
ACGAGTTCACGGAGCAATATGTCCTCATCCTCACTCCACGGCCCCTTGATCTTGTGCGAA  
ACCTCCTCGGTGTCGTCATCCGGCTCCGCCGCCATGAATCCTGGTAAAATCCCTAACCT  
CGCCGGTCCCTAATTGGAAAAAATATCTCTCACGATATATATATGTCTCTGTGTTTTAT  
GTGGTGTCTTAAAAGCGTTAAGGACTTAAGGTAACCTGAAAGAACGGTTAAAGAGGGAGG  
CC

>RMYB14

GGCCCCCTATTTACAGATTAAGAATAAAAACCTCTATAGGAAGAAAAACACACATGACTT  
TGCTGCACGAAAATGAATTCATCAGACCTTGAAGGAAGGAAGGAAGCAAGAAAGGATC  
ATCAATTCATCATTAAATTCATCATATAATCCCAACTAAGAAAACCTGTCCGAAAGTGGGAG  
CCGATTAATTGTATGCCAATTACCAATGCTCAAGGATCCGTCCGCTGCGAATTGTCCCT  
GTGCTTTGGTTTTCCCGTACATATGATCTTGTCCAGTCCGATTGTGGATAGAATTTCCCA  
TCAAAAACGGGGCTTGCAGATACTCATTCCACTTGATCATATCTTCCCAATTTCCCGCT  
GGGTTGTTTTATATCAGTTTTCCACTCGAGTCTGCCGGCGTCCATGGGAACCCAGCGC  
CGTTTTCAAATGTAAGTACTGTAGCCGCTTTGGAGCTCAGTGCTGCTTTTCGAATTTACGGTGA  
AAGGCGTAAGCTGGGATTGTCCGCAGGAAAGTTCACAGGAGGCTTATTAATTTGGGGGA

CAATCGGGGGTGAAGGTTATTA AAAAGCGGTGAATTGGTGAGGAATGGTGGTGGTGCTGA  
TATCTGGATTATTCATGGAAAGGCCGATGTTGGGGCCGTAATTGGGGTTCTGGAAGGAGA  
GGAATCCGGACAGGTGACACAGGGCTTGGCAATGTGATTACAACCTGCGGCAACGAACC  
TGTTGAGGAATAATCCTGGGTGGAGTTTTCCAGGAGCAATGGATGGTATCTTTCGACCT  
GCAGGGGGACTACTGGTGATTCCAGGGCTGATCCTGATCCTGATACTGGTCCATGGACGC  
TGTTGGAAATGTTGTTATCGGGGTCAACGAAGCTGAGGTCACAGCTGGAGCCTTCTGAGG  
CCTTGTCATTGTTCTTGTCTGTTGCCTGCTGACGCCGAGGTTTCCA ACTGGTCGTTAATGC  
TGTTATTAATATTCTCCTGGAGGGGTTTGTGGGTGTTGGGGTCTATCCCTTCTGCCTCA  
GCTTTTTCTTGATGGAGGAATCCACAGGTTCTTGATTTTCGTTGTCGGTTCTTCCAGGGA  
GTTGGGCAGCTATTTGAGACCACCTGTTTCCAAGA ACTGAGTGCAATCAATGATCAAAT  
CCTCCTCCTCCTGTGAAAATGTCCCTCTTTCAAATCAGGCCTCAGGTAATTGATCCACC  
TCAATCTGCAGC

>RMYB15

CTCCGCTCCGATGGGTACCTAGACTAGACAATGCAGGATCGCCTTACCGGCCATTAGG  
CTCAGCTGCAGCTACCGATCTGCATCCCATCTGCTCGAGAACTTGGACAGTCGGATGTG  
CTTGGCAGCCATTGCTCGGCCAGTTTCTGCTCTTTCGCCTCCGCTTCCCTCCTCAAGCC  
TGCCAATTGTTCTCTGTACTCAGTTTCGATCCGTTCCAGTGTAGCCTTCTCCTCTCCCT  
TAAAGCTTTCACTTTTGCTTCAATGTCTTCCATTTTCTCCCTCTTACGGTTTGCTTCTC  
TGATTCCAGCTGCAGTTCGACCCTTTTCAATCTCCACGCGGCTTCTTCTTTTTCGAGGC  
AAGTGCACGGTGCCTTCTTCCAATTCTTTACAGCACTCGACTAGTTCAGAAACGACTGT  
GCTCTCCCAACCATAGGGGCAATCCCGAGTGAATGTATATTGTTTCATCATAACCGTGTGT  
CGCGCTATCAGCTAATCGATCAGGAGGTTGTAGCCACGGGATTGGTGGTGTAGGTGGCAC  
AGTCAGGGGAGAAAGGCTTAATGTCACGGATGGGGAAGGCGGCCTGACAGTTGCGGTCGT  
GCTGGA ACTCGCTAGCCATGGAGGCAGCACGGAGGGCGCCGAGGGGGCAGCTTGTCTCC  
GTGGAGATATCCGCCATTGGAAGCCGGCATTGTGATCCCCGGCACGATATGCTCCCTGAC  
TAGCTTCTCGGCAAACGTCTCCAAAATATGATCGTACTTTCCTTCTTCAATCGGCTCAAT  
TGTCTTGTTATTCTCCTTCTGCTCGCGCTGCTGCTTTTCTTTGAACACTTCCCACCACTT  
CCCGAGCCTTTTGGCGGTTTCGACCAGGGACTTCAGCTGCAATTTTTTCCATTTGTTGCC  
GTGCTTGGCCTGCAGACGGATGACAAGTCGCTGCTCCTCTTCAGTTAGTGATCCTTCTT  
GATTCCGGGTTTGAGATAGTTCTTCCACCTCTCTAAACAGGATTTTCGCATCCCGGTTGAG  
GGGTTGGTTCATGCGCTCCGACACAAGGTGCCAATCTCTCGGTCCATACTGCTTACATA  
CGCACGCAACAAAGTGCCTCTTTCAGGTCGCCAACGCTGCCTTTCCTTCATTTGTCGACG  
CGAGCTCTGCCATTGCCTCGAACTCTTCATAGCTATCTGATAACATAGTTAGAACAACA  
AAATTGCAGAACATAAACTACATTGCAAGATCAGTTATTTACAGAATCCATTGAATATTT  
ATGACCATTGCAAAACAGGACATATTCCCAAAGCATTTCAACTTGACGGAACAGGACAC  
CATAAACTGATGATTAATTTCTTTCATTACAGGACATTCATTGACTGAATAAAAATAACAC  
ATAAAAGAAAGTAATGGAAAAGGAGTAGAGTAGAGATCTGGGAAATCTTTAAGAAAAGCT  
AAATTCATATCAATTTTTTCATAATTCAAGCAAACCCTAATGCTATATCAAAAATAGGAATA  
TGTATATATAATAAAAACAATACGGTATGATTGTCACATCTCTGATGATGATGAAACCTCT  
TCATTCTTTTCAATTATTTAATTATCATTATATAAGCCAATATGTCAACAAAGTTAAGA  
TTTGCATTTAATATTCTTCTCAGAAACCAAGGTTACAAATATCCACACAATAAACTAATC  
ACCTCAAGGAGACAAGACAGCAGTATATTAGCTTTCACATTTGTCTCCATATATGTTTGCA  
ATAAATTATGCAAGAAAGAAGGGGGGATGAAACAGGGGCAGCTATCTGGAACAAGGCAA  
GAATGAAAGGGGGGTGCTACTTTATCTTCTTAATAGAAAAACCAAAAAAAAAAATGAACACA  
AAGGCACACCAAACAAAAGCTCAAATTGATTTACCAGAGAGAGATATCCACAAAAGATAC  
CATAGTCTTGCTTAAATCCAAAACATTTACATCATTACGACCTCATTTAGTGCAAATCT  
ATACAAAAACAACAGTGTATGTAAGGAAAACAGGCTTACAGTAATGTTCAAGAAATCCT  
GGTCTCTCCACAGCCATTTCTTGATTTTCCAACAAGAGCTATCTTCACAAATTA AAAAA  
AAAAAAAAAAAAAAAAAAAA

>RMYB16

TGACTTCAGTACGTCGAGACACCTCGGCGCGCCATTGGCTTGGTCCGGGCCGGCGGCCG

CTCGACACACTGATCCTGGAAAGAAGGAGAAGCCGAACAAGATCGAAGCTTGGACTGGCG  
GGCCAACCTGGCTTCGGCTTCGAGACGAGCGCTCTCCCACTGGGCCATATGGCTGAGGTT  
AGCGGCATTCTTGGACTGTCCATCGCAGGACAACAGGGGCATCATTTTTGGGCTTGTGGT  
CACCGGGTCGATGCCCATTTTGGCCAATCGTTTCTTAAGGTGAGTATTCCAGTAATTCTT  
GATCTCGTTGTCTGTTTCGTTTGGGCAAATGCGTGGCTATGGCCGACCACCTGTTTCCCAA  
AAGGGCGTGAAGCTGAATGATTGTCTGCTCTTCTTGTAAAGCTGAATTTGCCTCTTTAAT  
ATCAGGTCTCAGATAGTTCGTCCATCTTAATCTGCAGCTCTTCCACATCTCTGCAGCCC  
TGGGAAAAAACCCCAAACAGGAGTTTCAGACATGAACTACACATAAAGAGAGAAAAAGAA  
AATCTTACCAGCTTTTGCGGGCAAAGCACGCCAGCTACCATGGCCGTGCTCCTCAATATA  
TGCCAAGAGTTTGTGTCTTCTTCGGGCGTCCATGGCCCTTCTTCAATCCTATTTTATC  
ACAGCATGGAGACCTCCCCATTGGTGCAGAACTGAGAATCAGGCTTTAGGAGGTAGTTT  
GGTTCTGCACAAGAGTATATAATTAATTTCTGTGTGAGAGAAGAAGGGAAATTAGGGTTT  
GCCAATAGGTGAAGTGAAGTTAGGGAGTGTGATGATGTGGTAAATAAGGGGCGGAATGGC  
CAACATGCCAAGCTAAGGGAGTGGGGAAGAAAGGGATGGAAAATTGGAAATGGAGGTAGT  
AAATTAATGCACTTTCCTTCTTTATTTTCTTACATCTATTTTC

>RMYB17

GAATCCTGTTTAATTATTCAAATTGTTGAAAAAATTTGAAATTTCAAACATAAATAATT  
AAGAGATGGAATTTAAATCATTAATTTGGACCTGGAAAGAAGGAGAAGCCGAACAAGATC  
GAAGCTTGGACTGGCGGGCCAACCTGGCTTCGGCTTCGAGACGAGCGCTCTCCCACTGGG  
CCATATGGCTGAGGTTAGCGGCATTCTTGGACTGTCCATCGCAGGACAACAGGGGCATCAT  
TTTTGGGCTTGTGGGTCACCGGGTCGATGCCCATTTTGGCCAATCGTTTCTTAAGGTGAG  
TATCCAGTAATTCTTGATCTCGTTGTCTGTTTCGTTTGGGCAAATGCGTGGCTATGGCCG  
ACCACCTGTTTCCCAAAGGGCGTGAAGCTGAATGATTGTCTGCTCTTCTTGTAAAGCTGA  
ATTTGCCTCTTTTAATATCAGGTCTCAGATAGTTCGTCCATCTTAATCTGCAGCTCTTCC  
CACATCTCTGCAGCCCAGCTTTTGCGGGCAAAGCACGCCAGCTACCATGGCCGTGCTCCT  
CAATATATGCCAAGAGTTTGTGTCTTCTTCGGGCGTCCATGGCCCTTCTTCAATCCTA  
TTTTATCACAGCATGGAGACCTCCCCATTGGTGCAGAACTGAGAATCAGGCTTTAGGAG  
GTAGTTTGGTTCTGCACAAGAGTATATAATTAATTTCTGTGTGAGAGAAGAAGGGAAATT  
AGGGTTTGCCAAATGGTGAAGTGAATTAAGGGAGTGTGATGATGTGGTAAATAAGGGGAG  
GAATGGCCAACAGGCCAAGCTAAGGGAGTGGGGAAGAAAGGGATGGAAAATTGGAAATGG  
AGGT

>RMYB18

CAGAAGACGGCATAACGAGATCACTGTGTGACTGGAGTTCAGACGTTGCTCTTCCGATCTC  
CCCTTATCTTTTTTGACAGATTATTCTGCAGATTTCCATCAAATACAACAATAACAAAGC  
GCCATAAGATAACAACAATAACCCAGAGCTCCTGCCATAATTACATCTTCTAAGAAGAAAT  
TATCTGAGCGCCAAAAAACAGATTGTTTCTGAAACTGTCAAACCTGCCCTATCTTTTGCT  
GCTAAGCTGAACACAGGCAAATAACAAAAATTA AAAAGGAAAACAAGAATAAAAAACCT  
ATAATACATCGTGCTGGAGGGCTTCGGTTGAAAGCCCTCTCACCGTTCACGCTACCTGCC  
TACATCCCCATTACTTTTCCATGAGCCATCCTCCTCTCTGCTCATTACTTGCTGGTAC  
ACTAATATTTTGTGCTTTAGCATAATGCATCTTGATGGCAGCCACAGGGTCCGAAACACC  
AGAGCATTGCCCTCAACCACCATCCACCTCTGCCAATGCCAATCCCAATCATCCTTGG  
TTCGTGTTGTATTTCTTGCACACTGGGTC AAACCCATTTCTCCTTTGCATCTCAGAGAATAT  
GTCCTGCGGTTGCTGCTTCATCTCCTTTGTCAAAAACCTGCAAATCTTGGTTTTTTAATAC  
CTCATAATCTGCATTGCTGCTGCTCAAATCTATGCTGCTTTGGAAGGCAGTGACACCATT  
CAAGGGAGATTCACTACTCCTAACCCTTGTAAGACGGTAGCTCCAGTTTACCTGAGGG  
TTTGGAATGGCTGCTGAATGCAGCAGGATATTTGGCCAATACGAGAGTGGAATCAGGCAT  
CGATGGGAAGCCCATCAGTGTGTTGTTCCCATCCGAAAGCCGTAACCTCTAACAGAAAT  
ATTCTCAGATCCAATAAATTTATTACCACACACAGAAGAATCGAAAGTGGATTTGTGATC  
AGTGCTGCATCGGAGGCTCAGAGACTGGCAACTTGCTTTATGATGCTCCACTTTATCACT  
GCAGGCTTCTTGTGCACAGGAGTTTGGTTTTTGGCTGGGAGGATATCAAAACTTTTCCAAA  
CAATTCACATCACCATTCTAGCAGGCTTATCCAAATTAGACGGAGGTCTAGAGTTATC



ATAGCTGCTCTTTCCGTGAGATTGAAATGGCGTCTGGAATGATGCTGCTTCACTCAGATG  
TCTGGTACACTTTTGAAGGGAGAAATCAGGATGTTGATTGAAATGCAAGCTTAGATCCCT  
CTCGGGGAGATGTTGAACTGCATGCCTCTTGCAATTCACATCGCCATTGATCTCGTTCAC  
TGACGGCCCGGAAACAGGGTAACCCCTGAGAATCTGGGGAGAATCTACAGCTTCTGACAG  
CAAGTAACCTGAAAGATTCTGCTGATGGTCCCTTGCCCCAACTGCCTCCAGAGAATGTTT  
TTCCTGATCCTGCTCGCACCAACATATGCTAGAGGATTACAATTTGAGTGTATTTGATA  
CTTAATGGGAACAGAGAACATCATAGATGATGACTCTATTGACACCATGTGACCATTCTC  
GGGGGATGAGATGATGCAAGATTTATCAGCATGAAAGTTATCGAGGTTTTGGCCACCAGA  
TTCAACTTGCATAGAAGAAAATGCACCAACAGGTGAAACATTCCCAGCCAATTGCAGATC  
AGATTTACCTCACTGATTGCACCGCTTATAGCAGTGATTTCACTAGAATTGAGATCTCT  
ATCTTCCAGTTTCTTAGCATCAAAATTATCGTCAGATAACAGGGGTCTTTTCCATAATT  
TTCTTCAAAAATGACCCGGCAGAATCAGGTGGAACCTCCTCCTTATCTGTCTCCTTTGT  
TCCAACAGCTACAACAGAGCCACTACCCTCTTCTACCAGCAGAGATTCTGTGCGGGAGGA  
TACAACCACAGTTGGACCTTCCAGCTCAGATCCACATGCACCTTCACTCTTTCCTTTGCC  
AGCTGCACCAGCACCAGAGTCTGCAGCTTGTTTCTTGTTCCAACAGAGTATCACCAACTGA  
CGAAGTTTCCAAAACAGGCTCTGCAGCCAGAGAGTGAACATCAGGCTTCAAATTGTGTGT  
TGCTACTGCATCAGGCTCATGCTTTCCTTTGTATTGGGAGGCGGAAGATCCTCTTCCAT  
CTTGCAATCAGAGTCACCATTGCAAACAGCGGAGCCAGCCTGCACAACACAACCATCTTC  
TACATCACTACCACCTCCATTAGCATTGTTAAAACTGCATTGCCAGCTCCATGATGAAT  
CTGATCCAGCCCAAGACACTTTCGAGCTTTGCTAAAGAATATCTTGCACTGCTCCTTGGA  
TTTTGTTCTAACTATCTGTGCAATCATATCAAAATCCTTGCCATGTGATGACACAGCCTG  
GACAAAAATGGATTTCTCCTCATCAGTCCAATCAGCTGAATCCATCTCCTCAAAGCTCTC  
ATCCGAGCACTCATCGTCGACATTCTGAGTACAATCAGGGGTCAAAGGCCTCTTAGAGCC  
AGAATTGACTCTTGACACTTCCAATCCTGATACCCATCGGCATGGTCAAAGAAGTCTCGT  
GATGCAAGAATTCATGGCCTCAGATGACAAGGAACCACATATTCCAGCCAACACATCAGC  
AGCTACAGTTTCATTGCTGTAAATTTCTGACTATTTGATCTCTGTAGCAAACCATTGTT  
GCCCTTGTGGCTTCCCCAAGTACATTGAGAGATGCTGCATTACCTCTCGATTCCATCT  
TTTCCCAGTGGCAACCAAGTATGTGGTAGCTTGTGACTTTCTTTGCTCCGAAAACCTCTGG  
CTTCTTTCTGGCTCTTGCAAAGCATTGAGATTTCTGGTTCTTGTAAGTAAAACCTCAATGCA  
GTCAGCAATTGTTTTGTGTTCCAGGAAAGATGCAATCTTACTGAAATCTTTCCAAAAAC  
AGCAAGCTTATCAATGAAAATTTCTTTTCTCAGCAGTCCATGGGTTGATAATTGACCT  
TTCTTTTTCAACAGCACAAAGGATCTTCCACTAGACCATTGTTTGAGATAAATCTTGACAT  
CTTTACATCCTTGTCCAGTATTAAGGCTGGCATCTTCAGAGTATTCTGCAGGGTTTGAA  
TGATGACTCAGAAAGTAATCCATGAATGAACTTAATTACTTCTTCGGCAGGCACTGTCCG  
GTGGTTTGAAGCAAATAAGGAATTCGAGAACGACTGGAGGAACGATTCTTCTTATGCCC  
ACAATGAGTCATATCTAACATCTTGTTAGACTTTCCTCGAAGCTTCTTACAGATATTAT  
GCGACCCTCCCTCCAGAAATGCTGAAATACTCGAAACTTGAGAGTTATAACTTTCTCCTT  
AAATTTAGGGACCGCTTCTCATTAAAAACTTCTCCTTAACTGACGAACTCCTTCTGAA  
AGGGGGCATAATGGATGCAATTGATAAATCGAAGAAATAGTTTCTGGAAGGTAATAACT  
ATTCAACACCTCTAAAGCTCTACCAGCAGATTCTTTATTGGAAGCCACAATTATGTCATA  
GTTAGAGTCCCCACCACAATGAACATTGCCAACATTACCCTTTTGACAACCTGTCTGAAAT  
AGGTTTAGCAGCATCGAGCTGACAAGAATTAATCTCATTGCTAAGACCATTCTCTAAACA  
CAACATATTCAAGTTGCTGGAATTTTTCAAGTCAAATTGACAAAACCTTCACATTGAGC  
TGTCACAGAAAGCACAGACATCTTCCCCAGAGGAGGGCTCAACTATTTGATACGTGGCACA  
GCCTGGACTATTTATCTCCTCAGATTTCAATGCCTCAGATTCTTCTACAGAAGCAGGCAT  
ATTCTCAACATTCATGCTTCCAGTCGAAGCAACCTGAAAAGTAGGATCAACAGTAGAAGC  
AGAAGCAGCAACCAGCTCCATACAAGGTTTCAAACGGCACTCTCCTTGTAGCAAGCTTGA  
AGTATCTGGACAAGGACAGCAACTTCCAGGTTGAGCTATCAGTGACTTGAGTTGCGGTATC  
AAGTGAATCTATCTTAGATTCAGTCACCTCAAGAGCTTTTAATACGTCAACCTTCCATAC  
CAAAAGCTTCTTCAATTGAGGTAGTTTGTACATAATCTGTTTCCGCAGAACTCGGATCCTC  
TGATTGCAGCAATTCATTTAGGAAATTACTCAACTTGGAATAGATGCAAGGTCAATGCT

TTCTAAATTA AAAAGTTGGTCCCTCGCAGTGTCTTCTGGGACATAATACAGGGCAAACCAGA  
TAAATTATTATTCTCTTGATCAACACTTGCTGGCCTCATGGATTCTTTCTCCTCGGTACC  
TGGTGAAGAACTGAAAGCAACAGATGATGGTGTGGCAGGAGAAGCACAATCTGACATACT  
TGCAATTCTAGGGCTCTTATCAGACAGGTTAACAGAAGGTGAATGGACATTTTCAGTTAT  
ACAGACACTAAGCACCCGTCCATCTTTTACAACACCATCTTCAGGGCCTTCAACTTTCTT  
TTTCTCATACTTCGCAAGACCCTCACCCAGCCAGACGTGGTTTCTTCTGCAACAGGT  
CTCATCAGATGAAGCAGGAACAGAGGACCTGACATTAGAAGTACAAGGAGACTGAACAGG  
CATTGCACTCTTCTGATGTGCCTCGGCCACTACCTCAATAGAGTCCACTCCTGTACTCTT  
GGTGCCACTCAAATGGCTAAAACAAGGACCCCTTGAGGGCAAACCTTCTGATCGAGCCCA  
TTTCAGGGGCTTCCAATCTACTGAATCTAGGCCATTTTCTTTCTCAGATTTCTGAGCCGA  
GGTAGCCCTCCATCGGCAGTACCATCATTTTTCTCCTGCTCTTTAGTATGTGATAAAGA  
TTGGTCTGATGTGGAATCAGGAAGAGGATTTGGAGAGCCATTGACCTTACTGTTGTTATG  
GCATGTTTCAGAATTCTCTACAGACTTCTGGTTATTAACCTCAGTAGTGGTGAATCTCCC  
AGGACCACTGGAAGTTGCAGCTGGTTCCCATGAAGTAGATCTCCAGTCTTTCTGGCTAAA  
GGAACCTCTATTTTCCCTATTGGTCCCTAAAATACCTTGCATCATTGCGAGACCCTAAAGG  
CTGAAAGTTGTCATCTTCTAGGTGCCTGTCACCATATCTCGACCCAAAAGGCATAAATCC  
ATGACCAGCATCATCTGGGTAGCCATGCCATCCACCCTGCTTACCATGACCTCAGCAAA  
AAATTGAAAATCCAAAAGAGAGCCGAAAAACAATTAACACAAGAACTACATGTAAAAA  
AGGGCCATATCACATTAATATAATCCTCAAATAAATTATAATTTTACATTTACACACAAA  
AAGGGAAAGGCCGGAACAGATCTATACAACACCATCCACAAGAAAACCTCTGGTTTAAA  
TGGTAAACATCAGATCTGCACCACATATGCCACCAAACCCTCCACGGGATCACCTAATA  
AAGA ACTGAGCCATAATCTTCCATGACTAATTTAAAGAATTCATATAAACAAACAGGTA  
CCGAAAAAAGGCAGTCGACTTACAAATGACTGTGACCACAAGAAA ACTCGGAACCATCAT  
CATCCTAATAATCCCACCATATCCAACACTTTGATTAACAACAATAATAATCTGAACTA  
GAAGAAGCACCTAATATTTCCACAAAAGACTCCA ACTGGTAAA ACTCTGAAAAATAAAA  
ATATATATAGGATTCTAAAACGGTACTCACCGGAAGGGATTGGGCGAGATGAGCGAAAAT  
CAGAATACCAACGCTGCTGCTGCTGATGGTTGTGGTGGTGGTACGGCGGGCGGGTGTG  
GCGGAGGCGGGCGGTGGCGCGTGGGTGTGATGGTGT

>RMYB19

GGA ACTTTCTCCTTAATCATTAATCCAACCATAGGGATTCAAGCATTACCAAATTCAA  
GTAATTTGGTGACCCATAGATTCTCATCAGAGAGATTGAAAAAGTCAATTCACATCGAAC  
AAAGATTCTGACCCCTCTGTTTCACTACTACTAACATTTCTATTTCTATTTCCATCT  
CCATTTCCGTTTTGCTTCTTCTTCTCCAATTTCCCACTGCAGCCCTTTACCCCTGTG  
GAAATTCCTGGTGCACCCAATGCCCCCTGCTTCAATACCTTCTTGCTCAAATGATAGTTC  
CAGTAGTTCCTGATCTCATTGTCTGATCGACCAGGTAGTCTTGCTGCTATCATTGACCAC  
CTGCTTCCCAGGAGTTTGTGCAGCCTGATGATCAAATCCTCTTCTTGATCAGAAATATTG  
CCCCTCTTGATGTTTGGCCTCAAATAATTCATCCATCTCAGCCTACAGCTCTTTGCGCAA  
CGGTT CAGCCCTGCTTTGGCAGCAATGGTTGGCCATTGTTTCGCGCCATGGGTCCAATG  
GCTTGCACCAGTTTCCGGTCCCTCGTTAGCTGTCCAAGCACCCCTGTTGAGTTCCTTCTG  
CCTGCCTGCTTCTTTGATTTTATGGGCCATTAAGGCCAACTATTTTCGCTATATCGCT  
GCTGTTAATTTCTGACAATTCAGAACTGAGGGAAGCTTTTGTGGTCAAATGCCTCTGGCT  
ATTTTAGACATATGGTTGGGGATTTTGTGGCTCAAATGCCCAA

>RMYB20

GTTGTTTAGGATTAGGGTTTCCATTCTGTCTCAATAGTTTTTATTATTCCCAAACATGAC  
ATAAAGTCAATGACCATATTTGCCACAAAATATAACCCAAAATTTGGCAACACATCAT  
ATATAGTGAATGACATACATTCAATAATATAATAATAAATTCCAGTCTTTAACATTTA  
CACTCCATGCATGCAATCAATAAAAAATAAATTAAGAAAAAAAAGAAAAAACAGAAG  
CACAATTAATTAATTAATAACCCCTTAACAATCCTTATTACTTTTTTTTCGGATTTTA  
ATAATAAAGCTCTCTATTTACACCCTACCCTCCCTATTATATTTATTTTATTGTGCCA  
AAATAATAAATAATAAATAAATTAACCTTCGGTAAAAACA AAAA ACTAACC ACTAGCTTCT  
GTA ACTTTTTACTCTTTTTTGAAATTTTTTTCACCGCCACCGCCGTTGTCGCCGGACCC

ATCTCCGTTATATCCGCCCACTTGCTTCCTGCAGAACAATATCACGATTCTGCGCGGCA  
TTCGCCACCGATGAGTGCTGCTTGTTCGCGATAATTTCGAAACCCAATCCCTCGTCGTCG  
TCGTCATCGTCATCCTCGTCGTTGATGTTGTGATCGTCGCTTTCGTTGTCGCGATTGTCC  
TGATCCTGCATTGCGGAATCCGGGAGTTGTTGTCTGTGTAGATTGGGAATTGGCCACTGC  
TGCTCCGGCTGCGCCATTATTGGCACCATGGGGTTGTTATTGTTGATCTCCTTGCTCTT  
TCTTTGTATATGGCTTCCAGCTGGTGAAGTAAGGGCACGTCTTAGCGTCCTCCGGCCGC  
TTCTTGTTGCTTTCCTTACCTTCTTGAAGTACTTGTGATATTCTCCATTTCTCCTTG  
CAACGCTTCGAACTTCTGTTGTATCCAAGCTTCGCCATAGCGGACGAAATTTCTCCAG  
AGAGGGCCTTTTGGCCCGTTTTCTTGGTATTTTAAATCCATGCTTGTTCGTAGATTAATT  
AGCGCTTGAACCTCCGCTTTTGGCCACCGTGATGAACTCGCGGCCGGGAATATCCGGCC  
ACTTCTCCGCCGTTGTTGTCCGTTTTTGAATTGTTGAATACTTTCGCCGGTGGTGGCACT  
GTAATTGGAGCTGGCACCGTTGTGTCGTTGGAGCTGGCGAGGCTGGTGGAGGCTCTGGT  
TGCTGCGGTGGCGGAGGAGGAGGAGGAGGCCGCTCCTCCGCCGCCACCAGCGGGGATC  
TGCAAATTGTGTTGATCAGTTACTTTTTGTAAAAATGCAATCACGGCGGCGTCTTTAGTG  
GCGGCGATGGATCTCTCCTGGACTAATAGATCATGTTTCGCGATTAACCTTGCGGATTCC  
TGAACGCGCCAAGCTTCTCCCTCGCCATTCTTTCGCGCTCGCGTTTCTCCAGTGTATCC  
AGGAATTTCTTCTGCAATTCCTCCTGTTTCTGAATAACGTCCCACACCAGCCTGTGGAAG  
CAATCCTTCCATTTCTCCTTCCACGCCGTCTTGGATATCCTCGTCGGACGAAGTC  
GACGACGACGTGCAATCCGACATCAGCCCCGGGCGCGATGCCTGAAAGTTGAGTCCTTGC  
GTAGGAACCGAGCTGTTCTCAGATGCTGCATTAGCGGCGGCGGCGGCGGCTGCGCGATT  
AAAGGAGAAGAATCGATAGGGATTGAGGCAGCTGCCTGGGGAGGGACCACGCTTAAAGGC  
GTCGGACTAATTGATGAAACAGTAACATGGGCTGGCATTGTCGGAAGGGAAGCTGTGGCG  
GCGGGGCGCGGGGGTGAAGGGATTAGGCGGCGGAGCGTTCTCCAAGGCTTCCAGTTGA  
TCGAAGAATCGGTAGGTTTTGCCGTCGGATTTTTCGCGGCGGCGGCTTTTGGTTTCGCTTG  
TGGTATTTGTACACGTTCTCGAATTTCTCCCGGCATTTCTTGGCGCTTCGATGGAATCCG  
AGGTTCGGCCATTTTCTGTAATTACAGTTGCAGAAGTGATGTCGGATTCATGATTTAAAA  
AAACTCGAATTCAGACAAACACATAAAATAAAAGGAAGGAATTAACCTGCACTGATTAAG  
>RMYB21

TAGACCGTTTTCTGGTTTTCTCCTAGCGGTACTCAAGCCAGTGAAGTATTTCTGAGCATGGC  
TAGCCACTTTCGATTTTGTTTTAGTTGGCACACAATAGCTTCAAATGCTCTTCCAGTCGC  
CTTTTCCAACTTCTCCAGGCCGCGTAAAAAAGATCTATGCTCCTTCTGTCCAACGAA  
ATCTCTTCTGCTCATGAATTCAGTGGTTTTCTTTCTTAGCTTTATTCTTACTAAAAT  
GATGAGGCAATGGTACCTTTCGAGACTCGACTATTAAGGCTTCATAGTGAAGTTTTAACT  
CTTCAATAGATTTTCCAGGAAGTCCAAACACAACCTTATCCCATAGATCAGGATCACCAC  
GGAAGAATGCCAAAGCATTGTCAAATGCCTTATCCTTCTCCTCAGTCCAACCTCGAACCAC  
CATGTTCTTCATCCTTCCAATGTATCCGCTGTTTCCACCAATTCTCAATGGTATCTCTT  
TCTTTTCGAAACCATAATATTGCTTGGATAATGAGGCAAAGGCACCTTACCTGACCCAA  
TTGCCTCCACATCATATCTTAAGGCTTTATAGTGATGTTTTACATCTACAATTGTCTTTC  
CAGGAAGTCAACTGGGAAGTCCATGGATCAGCATCATTGTGGCATAGTGCCACAG  
CATTCTCAAATGCCTTATCCCTTCCCAAGTCCGAGATGAACCACTGTAAGCGTTCTTAA  
ATGATGCTTTCACCTCCAATGCCCTGGAGCAGCTGCTGGATGACCCACTGGTGTCCATTC  
TTCAGGTAAGTCCGAAGAGAGATGTAGCCATCCAAGTACAAAGGGAGCACGAGACACCT  
AGTCTGAAGCCACTGCAGGTTTCTGAATTCAGACATGTTGCC  
>RMYB22

CTTCAAGCTCATTACAGCACTTGAGAAAGCCATATCAACCAAATTAGCATCTCTGCATTC  
AACCTTTTACTGTTTCATGTTTTCTTCCAGGTAATTTATGTCCTTCTGCTGATTGTCTCC  
CTGCACATGGCCACCAGAAACCTTCACTGAAGCCTTGTATAAGCTTTGCTCAATCCATC  
AGGCAGGCCACAATCAAACCCAGTTCAACTTGTGGTGAATTGCTATTGGAGACAAACAT  
GGTTCTAACATCCAGCTCAGATCCATCTGCACCTATTTCTCTTTGCTGCCTGAATTTAA  
GTCTAAAGCAGATTTATCATCCACTAGAGAGTTGCTCACTGACGAGTTTCTTAAACAGC  
ACCAGCAGCCATAGAATCAAGAGGGCATGCTCTGCTACCCTACCATAGTCGCTAGCATC

AGGCTTCAATTTGTGCGATTCTGCAGTATCAGATGCCTGATCCATTTTCATCTCATGAAG  
GGTAAGATTCTCTTCAATCTTATTTGCGGAATCATCACTGCAAATAACAGAGCCAATCTG  
CACAGCACAACCATCTTCAATATCACTGCCACCTGCATTAACATGACCAGTGCCAGGATG  
AATTCGATCCAACCAAGACACTTGCGGGCCTTGCTAAAGAATAACTGCATTGCTCCTT  
AGTTTTTGTTCACACATTGCGGAGATCCTTGCAAATCTTTGCCATAAGATGACATGCT  
CTTAATGAAGATGGACTTCTCCTCATCAGTCCAATCAACAGTCTCTATCTCCCCACAGCT  
CTCGTCTGAGCATTTCGTCATCAACATTCTGTGTAACATCAGGGGTCAAAGGCCACCTAAT  
GCTAGAACTGGCTCTAGGATCAAAAGAGCTTGTGATAACAAGAACTCATAGCTTCTGATGA  
CAGCGAACCACAAATTCCAGCCAACACATCAGCTGCAGCAGTTTCATTACTGTCCAAATC  
CAGACTGTTTGATCTCTGCAATGGACCATCATCGCCTCTGGGAATTTTATAGGAACTAGC  
TGCACCAAAAAGGATCCTAGATGTACATTTTGGCTGCTGCTGAGTTCCTAATCCATCATT  
GACAGCAGCCACAATTACCGAAGCATCACCAAGCATATCCAGATTCACACTGTTTGCCTC  
ACGATTCAACCTTTTCTACTAGCCACCAAGTATGTTGAAGCTTTCGACTTGCTTTGTTT  
AGCAAACCTCTGGCTTCTTTCTAGCTCTTTCAAAGCATTTCAGATTTGTGATTCTTGTAGTA  
AACTCAATGCAATCAGCTATTGTTTTATGTTCCAGAAAAGCTGCTATCTTACTGAACT  
TTTCCCAAAGATAGCAAGTTTATCAATGAAGATTTCCCTCTCTTCAGCCATCCAAGGGTT  
TATGATGGATCTTTCTTCTCTGAAGCACAAGGATCGTCCACCAAACCATTATTTGAGAT  
AAACCTTGACATCCTTTTCTCCTTCAAATAAAGCCTGGCATCCTCAAAAAGTTCCTACA  
GGGTTTGATTGCCGATATTGAAAGCAACCCATTAATGAACTCCACTATTTCTTCTGCAGG  
CACAATCTGATGACTTCCAGCAAATAAAGAAATCCGAGAGCGAATAAAGGAGCATTTCCT  
TTTATAACCAGTCCGACTTAGATCAAACATCTTGTGAGACTTCCCCCAAGTTTCCTTGC  
AGAAACTACACGACCTTCTTCCAGAAATGCTGAAATACCCTAAACTTGAGTGCAATGAT  
CTTCTCCTTAAATTTGACGGACAGCATTTTTGCTAAAAACCTGTCCTTAAATTTCAAGAA  
ATCCCTCTGAGAAGAGGAAACACTGGTCACAGTTGAAATATCAAATATACACTTTTTATC  
AGGCAATAACTTATTCAACTCCTCTACAGCCCTATTCGCTGACTCCTTATTGGAAGCAAT  
TATAGAGTCATAAATATGGTCACATTGGATATCGCCCACACCATCAAGATGCTGCCAGTT  
ACTCATTGTAGAATTAGGAATATCGACAGGGCACACATTATCATCATCACACAAACCATT  
CTTTAGCAAAGTCTCATTCAAGTAACTGGCATTGTCCAACCTCAAACCTTAAACAAAACCCTC  
AGCAAATTCTGTAGTCTTAGAAGTACAAGTGTCTTCCCATGTGACAGTGCTCAACTAG  
TTTAGAAGTTGCGGTACCCGGACTATCAATCTCCTCATCTTTCTGCTCCAGATTTTGGTC  
TTTCAGCGCACCAAGGTGTGTCCCCACTGTTTCATGTTTCCAGACAAAGCAATGTGCAATAG  
AGCAGGTACAACAGTAATACCAGAAGCAGCAGCATGGTCCTCAGAAGGATGACATCCATC  
AGATTCAGCTGTGAGAGACTTGAGTTCAGTTTCAAGAGAATCTATCTCAGATTCAGTCAC  
TTCAAGTGCTTTTAAATATGTCAAGTTTACATAGCAACAACCTGTTTCATCGAGGTGGTCCG  
TATATAACCAGTTTTTCGCAGAACTTGGATCATTAGAGTTTTTGAATTCATTTATCAACGA  
GCTCAAATTAGCAACAGATGTGAGCTGCAAGTTTTCTAAAATAAAAGCTGGTCCCCCATG  
GTAAATCTGGGACGTAACATCAGGCGAACAGCTCATATTTGCTGTATTCTGATCTACATT  
TGCTGCCTTTATGGATTCTTTATCATCAATACTTGTAATTCCTGGGGAAGAACTACAACC  
AACAGAAGCTGGAGTAGCGGGTGAGACACATTCCATAAGATTTGCAAATCTAGGGCTCTT  
ATCCGCTAGGCTGACAGAGGGTGACTGCATCGCTTCGGTACTAGTAACACTAACAACCAG  
TCTATCCTTTGCTGCACCATCTTCACGGCCATCAACCTTCTTCATTTACACTTCGCAAG  
GCCCTCACCCAGCCAAGGCGCGGCTTCTTCTGGAACCTGGTCTCATCAGATGGATCAGG  
GGCATTGGGCATGGCACAAGCAGCACCTGGAGACTGAACGCGCATCACATCCTTCTGCTG  
CACATCAGCCACAATCTCAGTTGAGTCAACTCCAGACTTTTGGAGCTACTTGAATGACT  
GAAACCAGAGCCTCTTGACACCAAACCTCCAGACCGAGACCATTCAGGGACTTCCAATC  
AATCGAGCCTAGGCCATTTTCTTTGTGAGAGTTCTGAGTCAAGCTCGTCAATGTGTGAGC  
AGCTCCGACCTTTTCATGCTTTTCTTTGCGGCACGGTTGGGATGGAGATGATAAGGATTT  
AGGAAGAGGAGAAGCAGAGCTCACAGTGTGTTCTCATGCCATGTTTGGAGTATTCCTAC  
GGCCTTCTGATTACTCACCTTAGAGCACGTCCCGGATTTCTCTATGACTTGATTATTCAC  
CTCGCCCCTTGACTCCACACTACCAGACCGAGAACAATTCAGGGGCTTCAAATCAATCGA  
CCCTAGGCCATCTTCTTTGTGAGAGTTCTGACCCAAGGCCGTCAATGTATCTGCAGCTGC

AACCTTTTCATGCTTCTCTTTTCAGGCGAGGCTGGGACGGAGATGATAAAGATTCCGGAAGG  
ATGAGCAGAACCCACACTGTTGTTCTCATGCAATGTTTGAGTAGTCCCATAGCCTTGTG  
ATTATTCACCTTAGAGTATGTTTGGGTATTCTCCACC

>RMYB23

GATCTCCCCTGGCAAACTAAATAAGTTCATCCAACTGACCTTATAATAAATGAAAAC  
GAAAACCTCATCGTTTCAAGCAAACCTCAAACAATCAATAGCTACTAGTAACTAAGAGAAAG  
GACCGAACCGATATCCAAAGACGAAAGAGTAGTATCATATATTTTCTTGGGCGTGTAAGT  
ATTCCTCGGATACCTTCCCGTTATATATGTATGTCATTAGTAGCTTCAGTGTCACTTGG  
AGTGCTCTGCTTTCATGTATCGTGCAAAATGCTCATGTACATGTAGATTACATCCATTT  
CTTAAGAAAGCTCAAGTATGGGCTTCCAAAATTGGCAAAAATCTACTACCCCAAGGTAG  
TCACCGAAGACAGGTTATTAGCAACAACCTGATAACCGTCTCCACTTTCACGATCCTCTT  
CGTCATCCATGCCCTCTCCTTGGTTTTGATGATCATTGTGCGCGTATTCCCAATTGTCT  
GTTCAGGTTGTTGCTGGTGTGCTCTTGGCCCATCATCTGCATCAAGATTTGTTCCGGGCT  
TCAAGCTGCTTGTGCCATTCTCTGAGTTGTGGTCAGATTTCTTGGCCCTCTTAGCATAGA  
GAGATTCGAGCATATTAATAATATGGGCATGTTTTGGAATCATCTGGCCTCTTCCTGTTGC  
TGTCTTTTACTCGTTGTAGTATTTATTTATGTTCTCCATTTCTCTTTGCACCTCTTGG  
CGTTCTGTGCTAGCCAATCTTCTTCATACGAGCTGAGATCTCCTCCCACAACGGCCCTT  
TCGGCCCACTGTCTGGTATTGCATATCAAGATCTGTTTTAAGCATAATCAGAGCTTCAA  
CTTCAGCTTTAGGCCATCGTGAAGAAGTCTTGGACAACATTCTCGCCGGCACTATTAT  
CCTGCTTCTCGTTGTGTGCAGAAGCTTACCAATGCCATTGTCCTGCACAAAAGCACGTT  
TCTCTGCAACACTCTCTTGATTCTCGGAACGCTTGTCAAACAACGAAGCAAGAAGTTCAG  
GCATCTGCAGCGGAAGCGCCTGCTGTGTGATTTTTTGCAGGAAAGCAAGCAACTGCCGCT  
CCTTTTCTGCTGCTATTGCCCGCTCTTGGGCCAAATACTCTTGTCTCCCTCTTAATCCTAG  
CCATTTCTGAGCCTTCCACGCCTCTTCCCGAGCCATCCTTTCTTCTCGCACTTTTCCA  
AAGCTTCCAGGAACTTGTCTGCAAATCCTCCTGCTTACCAACACATCCTTCATCAACC  
TCTCCAGATAATCCACAAGCTTCTCTTTTCTTAATGCTCCCCTCCGAATCCCGTCCAG  
AGGAGGAGGCAGTCGATGTGGATGCAGATGTGAACTCAGCAATTGGATAGTTTGAACAAG  
GAATGGGAAAATCCTGACTACAACCACCTGCTTCGCCATGGCTGCTTCTGCTGCTGCAG  
GGTCCGATGCAGGCCTGGTGTAGGAGGGAAGTGGATTTCGAGGGGGTCGATGGGACCGAGA  
ATTGGGCATCCAAAAGCTCTAACTGCTCAAAGAACCTATAAGCTTTCCCATCTGCCGAC  
TGGATCTCCCATCTTTGGTTCTCTTGTGATATTTATAGATGTTTTCGAATTTCTCTTTGC  
ATTTCTTGGCACTTCGATTGTAACCAAGCTCGCCTAATTTCTTGGAGACTTTATCCCAA

>RMYB24

ATTGCTATTCAGTGATTCAATCATTTCAAATTTTCAATTACCGAATAGTAAAAGCGTTAT  
TTACTTACTCATTAAAGTCGCTAATCGCAATCCGCTTGCCGCTTAAAATTCATCCCCGC  
CGTTCATCTCCCGTGAAAAGTAATTTCTCACTTCCGATCTGATCATCTCTTGAATAATCT  
GCAGTAGCTTCGGATCAAACGCCGGACCCGGCGGCGGAAACGCGCCGTTTCCGCCCCGCC  
GCGGTGGAGTATCCGACGACGGCGAATCCTTTTCGCTAATCTCCTTCGCCGACGACGAAA  
CGCTCCCTGGCAAACCTTAGAGTCAACAGAGTCAATTCAATATTGGAATTATCCTCATTCT  
CAGCCGCCCCATACTGCGGCGATTCCACCCCCGGCGAGCTCCTCGCCACCGGAAAATAGA  
AATTTACGTTGTCTTCGCTGGAATCATTGGTTTCAGAATTTGATAGATTATGCTCTCTG  
GACTTACTCTCAACGCCGACACACATCTCCATTCTCCGCTCGCCTCCAAACCTTCGCCG  
ACCGCTCATCGCCACCGGAGGCGGCGGCGGCGGCGGAGCCTTCCGCTTCAGCTTTGAGTTC  
AGTGATTTTTGACAGCATTATCCGTGCGTCCATTGAGCAGCCTCGCAATCTTCGCCCACT  
TGTCCCAAATTCCTATGCGCCTGCAGGATTCTCTCATCCTCCTCCGCCGTAAACGGAC  
GGTGCTCCACCTCCGGCGATAGCTGATTACACCACCGCAGCCGGCACGACTTCCCCGACC  
TCCCTGGAATCGACCTGCTCACCAGCGTCCAATTCGTCGCCCGTGCCGCTCCACGAGCT  
TTCGCAGCAGCTCGTCTCCTCCTGACTCCACGGCCCTTAATACGGTCCAAACCTCCGC  
TCGCCTCCGCCGACCCATAACTACAGGTACCGAGTTCCCAACCCAATCAACCAAATCC  
CTCCCTAATTTCCCAACCTAATCCGTAACAATCATCGATGGGAAAATCACTATATATAAA  
GGAGTTAAATTTGGGGATTAGGTTAGGGGTTAGCGATCGAGTCAA

>RMYB25

GCCTAGAATCAGTCATGAACTCAAGTTGTATGTGACATCTCTTAGAATTATCGGACAATC  
CTTTTATCTAAAAGGTTAAGTTGTTATTGGCCTATGTTCACTTTTGTCTAATTCTCCGA  
CATTAAAGAGTTTTGTCCTGCATGTAGATCAAAAAGTTAGAAATTCTTACACTCTCTGAAAA  
TTTGGGGCTAGGAATTGCGGCTGCCAATGTCCTGAATAATGGAGTCACATGAACAGGCGA  
ACCAAATTCTGTATTTGAATAATCACACACTTCTTACAGTTCTCTTCTATGTGGCCACA  
TGTAAGCATGTTCACTTCGTTGGTGCTTGCAGTAGTATTGCAGATTTCGACTTTCTTCAAC  
AAATTCATTTCCAAGCTCTTGATGCAGCACACTGATATCAGTTTTGTGCTCTTCCATTTT  
ATCAGCTGGAATGTTTGGCAGGAGAGTCGATCCTGTACTGTACTCAGAGCTTGCTGGGGA  
TGATGCATACACATCAGGTTCCCTCCAAGACAGTCGGCTCCCTTCGTTGCTGCTTCTTAA  
ATCTTCCACCAATTCTCTCAACTTCTCAAGATGAAAATCGTGATCAGGATTTTCAAAGGC  
TGGCAGATTGTTTTCTGTTTTGCTTTAGAAAATTCTTGGATTGCAATCCAGGCGCTTTC  
AAGGCTCTGGTTTGTCTTCTCCGAGTTAACCTTGATCGCAAGCGAACTAAGCAACTCAGC  
TTGTTGCATCAACGCAAGTACCTTCGGATCATCCTTCCCTAAGGAAGGTTCCCTTCTATTTT  
GCAATCTTCAAGCCCATCCATCAATGCTTCCCTTATTTGGTTTCGAGTGCAGCTCACTGGG  
GATGCTAACCGCAGACGAATGAGCATTTTGTGCTAATACTTGAAATGGATGTCTCAGCAG  
ATGATCTACGGCATCACATTCGCTGGATGGTCTCCCTTCTTGGCTTCTACTGCATTTCGT  
AACATCGTTCCCTCATCTTTTTAAGGGGAGCGCCACTTTTGTACCCTCCTGAATTGAGCCC  
ATTTGGGAATATAACCCTTTTGTGTTTAAAGTTGATGTAAGAAGTAAAGTTGTTCTCCTT  
TGCCAGCGCTTCGTGCTTTGCTTTTCTTGCATAGAGTGGCAAACCGGTTCTTACAGC  
ATTATCAGTTCTCCCCGAGACAACCTTTGCAATCTCGGTCCATCTGTTCCCAAATATCTT  
TTGTGCCTCACATAGAAGCATGTCTTCTCGGGCGACCATCCCCCTTTCTTGAAATCAGA  
ATTCAAGTAAAGTAAACCATCTCCTACGACATTGCCTCGCGTTTTATCCTTGAATTTTGA  
TGCAATAACAGCCCAATTTTCAATCCCATGTAACCTGATTTGCTCCCTCAAATATCATC  
CTCCTCTTGTGACCAAGAAACAATATGCCATTCCTTCCCTCTTGGAAAATCACCCTATT  
TGCACCACCCTCTTATTATTCCTTCTTTCATATTTTCTCAACTTGCAACAAATTCCT  
TTCATGACCCTTCTTTTCCAATAGATGTGTATTATATAACCAAAAAAACCAAGGGCAAA  
AACAAAAAAGAAATGCAAAAAGAAAAGATCAAGTCTTTTACCCCTTTTCTTCTTACA  
CAAAAGAACACTCACTCAGCTTAGCTCCCAAATCCAAAATCAAAGTGTGGTCTTTTAC  
CCATCCCCTCAAGCTCAACACAAAATTTTTTGCCTAGGATTCCCACTTTTTTTCCCCAA  
GGCTAAATCCCTTTCTGAAACCAACAAGTAAAAAAGAACACTTGAAAACAAGGGGTCA  
CTGCAGGCTTCTTAATTTGGATTCCACTTAGAGAAATTGGATGACAAAACCAGCCTCTCA  
GCCCTCTCAACCTCGAAA

>RMYB26

TGGGGGCGGGGCAAGACCCAATGACCAGTTTGAGTTTGGAGTGAAGGGAGCTCAAGCTT  
CGTTGCCTGGGCAGGCTCCGAAGCCGGGTGCCATATAAAACAGCATGGTTGACGCTGCC  
ATCGAGTAAACTTGAGGACATTATGCGATTGCAGGTTGGGTAACAATCATGTCCCGATGA  
GAATACCAAAGGTTGACCAATCTGCAGGGGATCATCAAATGGACTCCCCTGGCTAATGC  
ATTGCCTGTGGCAGTATTGAAACCTTGTAGCGGTGGCTCGGACGGTCGGAGGCGTTTGA  
AGGATAAACTGTTGATTGATGAGGCTTGTTTATGTTGGAAGAGTTCAAGTTCCTACCTTG  
TGCAACTAGGCTACGCGCTGAAATATCGAGCAAGCTACCAGGAAGAATATTGGGCATTGG  
TGCCGGATGAGTAGAATATATCGGACTGTTGAGCTCCAAAGCCTTGAAGTTGGGAATTC  
AGGGTTGCTGGCAAATTTGAAGCCCTGTTGGGGCACCGTGTGTAACAAAAGGTATTCTT  
GCTGCTGTTGTTTAGTTGGTTCTCCTTGGCCATTCGCAACCGGACATCAGGTGGATACGG  
CGGCAAGCCAGAGCGTTCTAGTCTTTTCGTCTAGTGTTCCAGAAGTTCTTGATTTTATT  
ATCCGTTTCGGCCAGGTAACCTCAGCAGCCATTCGAGCCATTTGTTTCCAAGCCTGGAATG  
AAGTTCAATAACCTTGCCTCCTTCTTCTTGTAGTGAATGAGCCTTTCTTAGATCTGGTCT  
GAGGTGATTAACCCACCTTAAACGGCAACTTTTTCCACAGCGAGCCAGCCCTGAGTGGT  
CTGCACTGCATTCCAGTTTCCCTCTCCGTGCCTGGTACATAGTCGATTAATATTGCATC  
TTCTGCAGAAGTCCAGGGACCCTTCTTGTAGCAGAATGTTAGCTTCTCCTGTAGTAGCACC  
TCTTCCACTGCTAGCATTATCCCTAGATGGCGGAAGAACTTCACTGCTAACCATCCTTTT

GTTGCTTCCGCTTGGCATACTCATACCCTGATTCGTCAAACCTGAATTTTGAACCAATCT  
TCCGCTGAAAACAAAATCAATCACTCCCCAAAAGCTCCAGATATCTCAAAGCCCGGAGT  
TTTTCTTTATCTTTATTTACTTATCTGGGAAAAAAGTAACACAAAAAGCAAAAACAAGAA  
ACCAAAAAGAACTCCAAAATCCGGCCTAAACTAAAAAGGGGAAGGAAGGACAACCAATGG  
GCAATCAAAGAAGCTTTGGTAAATCATGTTCCCTCCTTTTCAATTTAGAAAAGTGAAG  
GAAATAGCAAAGAAAATCCAGGGAACCCCTTTTGTGTGATCACAGGACACCACGATCCATT  
TTTTCCACATCCCATTAATCAATGCAACGAAAAAAGGGGAAAAAACATAAATAGATTTA  
GATGGATAAACCACGGAATTGGAAATTTCTCAGATAAAATTAATCATTTCCTTTTCA  
AAACAAAAAAGGGGAAAAAGGAAAAACCTAATGTGGAGAATTAGATAGCAGGAAAAGAGG  
AGAAATTCAGGGATGAACAGCACCCCACTTCTGAATTCATTTACAGATTAGCAGCTCAGA  
AAACACACGCAGAAGCCGCAATTCACCCCAATTCATTCACCGCCATTACACACACCAAC  
ACCCACCCACACGCACACATATACCTATGTATACATAGAGAGAATTTGATAAAAAAAA  
ATGAGTAGATTGAAGTGAATCTGCAAGGGTCTTGACCTCCACTGAGTTTTGTCTCTCTG  
TGAAGAAGAGTGTGTGCGGTGTGTGAGATAGAGAAAGAACACTGAAAACCAGCTAGCAGA  
GTGCCTAAATTTAGGTGTTTATATAAACATATAGGGAGAGAGGAGAGACACGCATTA  
T

>RMYB27

TCTTGCTGCTCCTCGTTGAATATATCATCATTAATCAATGAATCAAGAAAGAATCGTCA  
ATGCAGCAATTGAGCAAATCATCATCATCTTCATCCTCGTCTCCACGGATAATGATC  
CGTTTGTGTCAGTTTCTCAGTTCCTCGTCATTGCTAATTGGATAATCCATATTGTGCCA  
CCCTCAAGTTGGTCACTGTTTGTGATCACATTTTCAAAGGGATTAATGTTGTGCTATTG  
TTTGGGATAGGGCTGGAACTGATGATTTGTGTTCAAGTGCTTCTGATGATGAATCTCTG  
TTGACGTTGACCGACGATTTATTTGGGTTGAATGGTTTGTGGGTTTTTGGATCTAAGCCT  
TGCCTGATCAGTTCCTTGCACAGGTGAGTGTCCAGTAGTTCCTTATCTCGTTGTCTGTC  
CGCCCTGGAATTCTTCCTGCTATTAAGACCATCTGTTTCCAAGCAGACGGTGGAGGCGG  
AGAATGAGATCTTCTTCATCAGGGGTGATGTGTCCACGCTTCACAGAGGGGCGGAGGTAG  
TTCATCCAGCGGAGGCGGCAGCTTTTCCCACAGCGGAGCAGCCCTGCCTTCTTCGGCAGT  
GTTCTCCACCTTCCCTCACCTTCCCTCTTTATGTACTGCGCTAGAAGCTCATCCTCCTCA  
GCCGTCCATGGACCCCTCTTCAGCCCTACATTGCTGCAATATGGAGTCACTGCCGCTGT  
TTCCCGAGCTGCAACCATCACCATTGGCTGATGAGGTTTTCTTGGAGGAAGATGATGAT  
GGGCTTCTCATTGTTGAAGTGTCACTCTCAATTATGCCTATCCTCTCTTTATTCTTGT  
AAATTTTAGTTCTCACCACCCTATTAATTAGGATGGGGCTTAATCTTCTGCCTTTGGTAT  
AGGTTTAATTAAGATGAAATGATAGTGTAGAGAATTTCTTGTGACTTCATTTGAATTA  
TTGTGGATTTGGAAAGCTTACTACAACCAAAGAAAGCAAAAAGTGGAGATTATTTGAATG  
AATTTTACATGAGAAATATGTTTCTAAATTTGGCCTTGCATGGGGTTAAGAGAAGTGTG  
GTAAAGAGAAAAGGCATGACTGTGAAAGTTGTTCTCTACCACAATCAGTTACTTGACGTT  
CTTATTTTCACTAATAAGTAACAAACATGTGTAGTAAGACTTTTTTTCAATTTTTGT  
GGCTAATTTATATAGCTAGAGCCTAGAGATTAAGTTTCAAGAGGAGAGATG

>RMYB28

GCATGGGTAGAGAGCAAGACAACCTTTACAATTTCTACCATAAAGTAGTCTCACCAATAAA  
TACTTCCCTAATTCTGCAACACAACAGCTCTATACAAATGGATTAGATTATTAAGTTTT  
ACTCCTGCGGATTGATTATTCCCAAATTTTCATACCAAAAATTACAAACAATTTAATTTCT  
ACCAACATGTTATTGCCAACATTAATTCCTGTGAAGGTCTAATCACCTGAGCTAGAACCA  
AGACCAGGACCAGGAACAAAACCAGAACCGGCGTCTTGTGCTTCCTTGGATCACCGATGG  
GCGGAGGGGTGTGGTCCCAGGTAAGTCATAGGAGGCATGCTCAACCCGACCCCGGAACC  
ACGGATCCATGGACTGGAGCCCCAACTCCATACGCCATGTGCATGGGTGACGGGAGATTT  
ACTGGTGTCCCCTGCTGAGACAAGTGGTCCCTCCTATGGGTTGCCCAATGGTTGGTGGT  
GGCATGTACATGCTCACCCCGGCGGTAGCTACGGGTGCTTGAAGGAGGGGTTTGCTTGT  
TTCCCGGATGGACCGCCTGCTGATGAGCCGTTTGTGCTTACCAGGTGATGGGGCCTTGGGGC  
AATGAGATATCTCCACTCGCGACACTGGTGTGTCATGGATGCTTACCAGTCTCCTGTCT  
TTGTTTCATCGAATTGAGACGGATGAAGTACTTTTGGGCATGGCTGGCCACTTGGGTTGGA

GTCCGTGTTACACATAGTTCGGGAAATACTCCTCCAGTCACCTTTTCCGTACTTGTCC  
AAACCGAGAAGGAACAGCCTGTGTTTCATCCTCTGTCCAAGCAATTCCTTGCCTGCTTCT  
TGATCTGATTTTGAAGACTTGCCCCCGTGGTTGGATTCCCCATTGGACTGGCCCGAATTG  
GCCCTTTTCTGCTGGGTGTTCCATCACCAGCATGACTAGTTGAGCCATCTGAGGCAGAA  
TTGTAACATGGAACCTCTACAAAACCGGATTCTATCCGTTGGACATCGTCGACTAGCACC  
TCATAGTGTGCTTGACCTCCTCCACTGATTTTCCGGGACGTCAGCTGCAATTTTTTCC  
CATCTATCCAAAGTGTCTTCGGGATAAGTAGCAATCGCCTTCTCGAACTGCTTGTCTGC  
TCCCTGCTCCAGACAGAGCTGCTCAATTCCTGGCAGACGGCATCTAGTCTGTGAGAAA  
TTCGACAAATTGTCCGAAATACAACTGAATCCTAATGAGGTTAAAAATTCAGGGAGGAT  
CTAGAAAGGAACCAAACAAGAGCAGCTCAGATAGATATGTATAATGCTGTCCTGATTGA  
ATTCGCCGCGAATGGGCACACAATGTCAAGACTTTGAACAGTTGAAAAAATGTCGAAAA  
CACACAAACAAGTATGGTTAATAATTAGAGGATGAGTAACATCTGAAAAGCACAGCACAG  
CACAGAAAAACCCCTCTCGGGACCTCAAGAAATTCACAAATTCTCAACAGTGTGCGCC  
GGAGAAAGGGAATCTAAGGACAGAGATGGACAACGGCGATTGGCAAAGGCGAACGGGCAC  
GAATCGGGACAGCAATAAGGGGCAGTACTGTGTGGGAATGAATGTGAAATGTGAAAAGGA  
CCACCATGATAACAAACAAGAAGAAAGCACCAGAAGTCCAAAATGGGGCAATAATACCA  
ATTCAAATTGCCACACATCCATCACTACTCCTATCCCCACACAAAAAAACTTCCCCT  
TTTTTACCAGCCAAAA

>RMYB29

CTGCTCCTCGTCTTCATCAATTCTGCCGGCAAATGAGGATTATGATCAAGGGTGGAGTA  
TGGAAGAACACGGAGGACGAGATCTTGAAGGCGCGGTTATGAAGTATGGGAAAAATCAG  
TGGGCCAGAATTTCTTCGCTCTTGGTTGCAAAATCTGCGAAGCAATGCAAGGCGCGGTGG  
TACGAGTGGCTTGACCCCTCCATTAAGAAGACTGAGTGGACTCGAGAAGAAGATGAGAAA  
TTATTGCATCTTGCAAACTTATGCCTACTCAATGGAGAACTATTGCCCAATTGTTGGG  
CGAACTCCATCTCAATGCCTGGAGAGGTATGAGAACTCCTAGATGCAGCATGAACTAA

>RMYB30

CAACCAGTAAGTGTGTTTTCAGTCGTATCATTTAGTCTGAGTGCTTTCAGATTATGTT  
TTCAAAGCCCCTTAAATGTCTTTGCTTTGACAAAGGATCAGATAAGGAAGAGAGCTTAT  
ATGCACACCAATAATATTTTTATATCTCCACTCCAATAAGTTTAAATCAAAAAAGTATT  
CCAAACACCATGGAAAATTTATTGCACATTACACTGCACACTGGAACACAGCAAAATATA  
TATTGCTCGGATCCGCTTTTGTCTCTAATCACTTTCATCTATTCTATTCTAGTTATAA  
TATCTGTAAGGGGTAATCATGGCGAGGTGCCACTGTATAGTTACTCATAATGACTAAAGG  
GTTTGTGTTTGTGGGTTGTCTGTACATAGGCTTTTCTAGCCAAAAGGTTTGGGAACACTG  
GATAGCCGTATCCAAGTTCATGATGAAACAACATAAAGAATGGCACACCAAGGAAACC  
ACATAGGGAAAAAGGGGACTAATACGATGAGAAGACCACAGCTAAGATCGCAGCAGTTGA  
TCTTCAGAAGAAACATTTGGGTGCTCCTTACCACCATAGATTCCAAAGCAGATCATAGCA  
AGCGAATTCAGAAAACTCAGGGCGAGAAAGCTGCAATCCAAGGGTAACAACTCCAAGA  
AGAATCGAAAATGGTCTATACTGATGAGAACACCAGATATATATTTGTAATTATTCGAAG  
GACTGCAGGAGATTGGTCATAGACAATGGAGGAGTGACCTCTTGCAGGGTGGAGGTTGGG  
AAGGATTGGTCATTGTGCTAGGAGCAGCTGATTCCATTCTAGTGTCTTCATCAAGAAGT  
GCTTTTCACTTTCTGAAAATTTTGGGCTTGGAAATTGCTGCTGCCAATGCTCTGAACAAGG  
GAGTCACATGGAGTGGGGAACCTGAATTCCTGTGTTAGAATATCCACATGCGGCTTCATTAT  
TTTCTTTAGTATCATTGCCTGATACCATGTTAACTTCATTTGCAGTTGCAGTATGGCACA  
TTTCACTTTCCACGGAAAGACAACACTGATCATCTACTGGATTTGATTGCAATTCTTTTC  
CAGTTTCCAGTGTAGCACACTGATTTCCAGATTGACATGCTTCTATCTTATCGCCAGGCA  
CACTAGACAATAGAGTGGAACTTGTGCTATAGTCAGAGCTGCCCCGGGATGACTCACACA  
TATGAGGTTCCCTCCAGGAGGACTCGCTGCCTTCACTGCTCCTTAAATCCTCCACCA  
ATTCATTGCAGTTTTCAAATTGAAGATCAATATCAGGATGAGTGAACATGATCAAGTCAC  
TTTCTTTGTTTTGCTTCTGAAAGTTTTGAAGGACCATCCACGCACTTTCAAGACTCTGAT  
CTGTCTTCTGTGAGTTAACTTTGATTGCAAGTGAAGTGAAGTGAAGTGAAGTGAAGTGAAG  
ATGCAATCACCTTTGGATCATCTTTCTTTAGAAATGTTCCGGCACTTTTGTGTTTTTCTT



CAGATCCATCTGTTGATGCCCCCTTTATGTGATTAACATTCATCTGAGCCGGAAAGTCAA  
ACTCATGCACACGGGCAATTTGGCGGACTGTTGCAAATGGATGTCTATGTAAATCATCTG  
TAGCATCACACTCACCAGCTACTTTCTCTTCTTGATTTTCAGCTGCTGTATTTGAGATGT  
ATGTCCTAATTTTTTTAACAGGCACAGCGGTTTCAGATCCTCCTGAGAATATAACCCTTT  
TGTTGTTTGAATGATGTAGGAAGCAGTGTGTTTTCTTCTGCTAATGCTTCGTGTTTTG  
CTCTCCTCTTGCACAGTGTGTGAATCGATTCTTCACAGCATTATCGGTTCTGCCCCGAGA  
CCACCTTTGCAATTTAGTCCATCTGTTCCCGAATATCTTCTGTGCCTCACATAAGAGCA  
TGCCTCCTCAGGTGACCATCCTCCTTTTTTGAATCAGAATTCAAATAAGTAAACCATC  
TTCTTCGGCATTGTCTTGTCTGTTTTATCATTGAAGTTTGATGCAATAATTGCCAATTTT  
CAATCCCATGTACCCTGATTTGCTCCCTCAATATATCATCCTCCTCCTGAGACCAAGAAA  
CAATATGCCTTTCCTTCTGCTTTGGCACTCCACTATTACTAGCTTTAGTGCTGTTATTCA  
CCTTCTTCTTCACTCTCTGTAGCCTATAAATGTCTTCCCCTTTGGCATGCTCAAGGAA  
AACACTTTTGTCTTTTGAAGAGTGCTTATTATATAACAAAGAAAATTTAAAAATAAAAGAA  
AAGAAAAGAACTATGCCCTAGAAAAAAGATGAATCCTTTTCCCTTTACAGAAAAATGCG  
TAGCTCCAAAACGGAAACAGAATAAAGAAGGGCATCAAGAATAACACCAAACCTGCTGTTG  
GCCTTTTACCCTCCCCTCAACCCAAAAACTTGCCTAGGATTCTGACCTTTTCCCTCCACTT  
AGACAAAACATCGAACACTTTGCAAGCAAGAATCAACCCTCAAATGCTCGAGATTTG  
AGAACAAAGGCACAGAACTTGCATCCAAGAATAAATGGGCTATTATCAAACAAAAATA  
AAATAGTAATCTCTCATTACGGGATTCAAAGATGGGGGAGATGCTTTCTTGGTGTCTGA  
AAAGTGGGAGGCTTTCAGAAAGAAAAGATGCAAATGTGAAATGTGGGGGGTGGTGGCGTT  
GATTTAAACATATTTAATGTGGTATATGTAGACTAATAAATTCCCACAAATTCAGAAG  
CAGCAAACGGCAACGGATTCTTGTCTTTGGGCGCGGGTAAGAAGGGAAAGTTTGA AAAAT  
TATAACAAATGGTAAGAAGAATAATGATGAAAAAGGAAAATTTGAAAAAAAAAAAAAATG  
AAAGGGTAAAAATTGCTGAAACCCATGGGAGCATAATTAATGAATGCAGCGCTGAGTGCA  
GGAGAAGGGAGCATAGAGTAACCCACACACCCACGACGCGCAGTGTACACACCCACT  
>RMYB31

CCCTAGTTAAAAATTGGGATTTTTATCCCTTTTGTACTCTTGATTGTTAGATGGAAGGAG  
GAACTTGACAAATCACGCCCAAGTGCCCCAAAATACTAATAGTATCTTTGAATTTGCAC  
TAGTTACGTTGCAACATACTTTGGTTTTAAAAGTATAGAGTTGATTTGTATTAGTATATCA  
CTGTATTGAAATATTCATAAGGACTAAAGTGCAAATGTGCAGTGAAGAAGATCCTCTTC  
CGTAGTAAGATGAAACCTGCACTGGCCGACTACATATATATATATATATATATATATATC  
TACATATATGAAGCACTAATTAAGACGTGTTACCTATTAGTAATGCTCATTTTGCAATA  
TGAGGTGCAATGCAAGGTGAGAGGATTACCATACTAATTCATGAGTGATATGGATGAATT  
AAGATTTAATTGGGAAGAGGCTTCAATTCCCTGCACGCCCCACTGATAAGAAATCTATAA  
ATGGCAATGCCACAACCTCCTGCTGCTGCTGTGTTTTTAGTTTCCCAATTGACCCCT  
TCTGATCCACTTCTTCTTCTTCTTCTTGTATGCTCCTCCTCTTCAATATTTCTCTTTGCAT  
GCTTATGATTATTGATCACTTCACTTCTGTTTGGAGAGTCGGTGTTCACCTGCAGAAAGT  
TGTAGAACTCTACTTCCCTGCTTCCATTTTCTTGTAGCTATCTTGACATGCTGACGATCAT  
TCCACAGTGGCAGCATTAAACGCCGATGGTAAATTATACATGGAAAGAGGATTGCTGATCT  
GCTGATGAGCAAATCCATCCAGAAACGTGTGCCCCAGGCCAAGGGTAGTGTAATTATTAT  
TAATGCCTAAATCCTTCCCTTGCAGTACTTGTGCAATTAGTTGGTGTGCTAAGACCCTGC  
TATTGTTATCACATTTGGATGAAGACGATGATGATGATAATGTTAATGAGAGTGCTTCTCCT  
TCTCATGAGCATTGATTCCCTGATCTCCCAATGATGGGCTGATTCTTTTGTGACGACGAT  
GGTAATGATGAGATAAAGTTCTTCTTGGCATAGAATTTGACCTCTCTCTGCATTTTCTAG  
CCATGATAACATGCCAGTGGTTCTTACAGCATTATCAGTGCGCCCCGGGAAGAATCTTG  
CAATTACAGCCCACCTGTTACCATGAATGCGGTGGCAGGCGAGCAGACGCTCTTCTTCTCCT  
CCTCGCTGAAAGGGCTGCGGTTGATTCTCGGGTCTAATTGATTAAACCATCTCAGCCTAC  
AGCTCTTCCCTGATCGGCCCTGGAGCTTTTTCAGCTATGGCGTTCCAGTTATGAGGTCCAT  
ATCTTT

>RMYB32

GTGGATGATTGATCGTTTTCCGTGTAAGGTTTATGCTGATGCGTTATATCTGTAAAATAT

TTTTTGTTTCAGTCTTCATCGGTTTTAAATCCATGTGAAAGAAAACATCATGTATACAAATA  
AGCTGAGGATTTATTACTACAAATTTCCATGTCTTCCCCTATTCACCCCTTAATCCTTCC  
ATTCAAACACAGCTTTTTATTAAAGAGATGCTAAGCAAGTTCAATCCAAAACCTCGTAGA  
TTGCAAACGTTGAACTGCACATTTGACTCCTTGTGGCTTGTCTTAGGTAAACAGATTT  
CACTATTTACACAAAATAAAAATAGAATAAAAATAAAAATAAGATCCTGTGCGCATTGGTAT  
CTCGCCCGGAAATACCAGTGAATATCCCATGACCAAGTGACACAGAATGCTCTAAACCAC  
CATAGTCCTATACACATGGATGCGGTAGTGTTCCTGTTTTGTTTATTAAATTTAATAA  
GAATTATCATTCCAACACTGCAAAGGACAATGCATTGCTACAAAAGCACAGCACCATCCA  
TGTAGTTTTCCATCTTTGTAGCATCTTATTCAGAATCACCTGTGAGCAGATGTATGTGGC  
ATTGGATAAGTTGTTGGTGCACCGGGAACGACGGGAGCTCCGACACCATAGGTGGCCAAG  
TGAGGGGGCGGCGGAAGACTCACCGGTGTTCCAAGTGCAGAAACAAGGGGTCCACCGATA  
GGCTGTCCAATAGTTGGTGTCCCGTACATGTTGACACCAACGGGGACTTGAAGAGACTGC  
TTGTTGACTTTGGAGATGGGCCTCCTCCAACAGCCATACTATTTGTTTGGCCAGTGATT  
GGGCCTTGGGGCACGGAAACATCTCCATTGTTGACACTTGTGATGTCATGAATGCTCGAC  
CGCCTTCTGTCTTTGTTTCATCGAGTTCAATCGAATAAAGTACTTTTGAGCATGACTTGCT  
ACTTGCAGTAGGAGTCCTTGTACGACAAAATTCAGAGAAATGCTTCTCCAATCACCTTTT  
CCATATTTCTCCAAACCAAGAAGAAATAACCTGTGTTTCATCTTCTGTCCAAGCAATCCCC  
TTGCGACGCTCCTGTTCTGACCTGGAAGATTTGCCTCCATGGTTAGAGTCATTGTTCAAG  
AGCCCGAATTGCCACTTTTCTTACCAGCTCCTTCATCATCAGCATGGCTTGTGCAACCA  
TCTGAAGAAGAATTATAACAAGGAACCTGTATAAATCCAGATTCAATCTGGTTGACATCA  
TCAACCAAAAAGTTGGTAATGATATTTAATATCTTCCACAGACTTCCCGGGGACTTGAGCC  
GCAATTTTCTCCATCTATCAGAAGAATCCTCAGGATAAGTAGCTACTGCTTTCTCAAAAT  
TTCTTATCCTGCTCCCTACTCCACACAGAGCTGCTTGATTTCATCAGCCGGCATCTAGAGT  
CACTTTCAACCAAAATACGGATTCAATACTATCCTCAACCAAGAACCAAAACAAGAACAC  
TCCACCCTTCAAAGCTATTAATCAATTGTTCAAATCCTAAAATTCGTTTGGGATCTG  
GTTTATTTACTTTGAAAGACACCATAAAAAGCTCAGTTTAGCACACCAATTGCAATAAATA  
TCCCAAGCTTCACAAATTCAAGAATTGGAATGGGGTGAAGTACTGCTTACCCTATTGAT  
GATGAAAGGGAAATATGCCTGGTTAGAGCATGAGAAATATCTGAAAATCATAAAAATCCA  
GGCTTTACAATAAATTTAAAAAGGGGTGAAACAAATGGCCATAAATGAGAGTGAGGAGCA  
GAAAAAGATGGCCGGGGGTGGGGGACGAGAATAGACAGATTTTAAATTGGTGACGGTGAAT  
TCAATATGAATATGATGAGAGCAGTAAGGGCAGGCAGCGTGAAGGCGAGGAGGATGTGAG  
ATGTGAAAAGGACGGCCTTGGTACCAAAACAAGGAAGATAATCCCAGAGAGCTGAAGCAAG  
AATGGATAAAAACAAGATTGAAATCGCCATCACTCATCCCAACAATTTTACCCATTGGG  
CAGAGGCATAGAGAGTAGAGACCCATGTTTTGATGGCAGCCGCAGTTTTGACGACAGCAC  
AGACAGACAGGCCACCGCCACAAGAAAGATGAGAGTATATGAATTTCCGCCCTCTAGAG  
TCCAGCCT

>RMYB33

ACAGGGTTGTGCGAGATGCAGCAAGAGCTGCCGGCTCCGGTGGACCAACTATCTCCGGCCA  
GGCATCAAGCGCGGCAACTTCTCCGAACACGAGGAGAAGATGATCATCCATCTCCAAGCC  
CTTCTAGGCAATCGATGGGCTGCAATAGCTTCCTATCTTCCCCACAGGACCGACAACGAC  
GTCAAGAACTATTGGAACACTCACTTGAGGAAGAAGCTAGGGAAGCAGCAGCAGCAACCC  
CAAGGCCATGTTTATGTGGATGGAATAATAATTCTTCCCGTTCAAACCCGTTTCCGTT  
ACCAAAGGACAGTGGGAGAGGAGGCTGCAAACCGATATTCAAACGGCCAAACAGGCCCTC  
TCCGAGGCTCTCTCCTTGGATAAATCCGATTCTGCAGCCGTTGTTGATCAGCACCCAAGT  
CCAACGACCCAACTAGGCCAATTCAGACATCTATGTATGCAGTAAACGCGGACAACATC  
GCCCGTTGCTGGAAAACCTGGAAGAGCAATGACTCCCCAAAACCTGCACCAGGGCGCC

>RMYB34

CGGACGGTCGGAGACGTTTGAAGGATAAACTGTTGATTGATGAGGCTTGTATGTTGG  
AAGAGTTCAAGTTCTACCTTGTGCAACTAGGCTACGCGCTGAAATATCAAGCAAGCTAC  
CAGGATGAATATTGGGCATTGGTGTGATGAGTAGAATATATCGGACTGTTGAGCTCCA  
AAGCCTTGAAGTTGGGAATTCAGGGTTGCAAGCAAAATTAAGCCCTGTTGGGCCACCG

TGTTGAACAAAAAGGTATTCTTGCTGCTGCTGTTTAGTTGGTTCTCCTTGGCCATTGCA  
AACGGACATCAGGTGGATACGGCGGTAAGCCAGAGCGTTCTAGTCTTTTCGTCCTAGTGT  
TCCAGAAGTTCTTGATTTTCAATTATCCGTTTCGGCCAGGTAACACAGCAGCCATTCGAGCCC  
ATTTGTTTCCAAGCCTGGAATGAAGTTCAATAACCTTGCGCTCCTCTTCTTGAGTGAATG  
AGCCTTTCTTTAGATCCGGTCTGAGGTGATTAACCCACCTTAAACGGCAACTTTTTCCAC  
AGCGAGCCAGCCCTGAGTGTCTGAACTGCATTCCAGTTTCCCTCTCCGTGCCTGGTCA  
CATAGTCGATTAATATTGCATCTTCTGCAGAAGTCCAGGGACCTTTCTTCAGCAGAATGT  
TAGCTTCTCCTGTAGTAGCAACTCCTCCGCTGCTAGCAATATCCCTAGATGGCGGAAGAA  
CTCCACTGTAAACCATTCTTTTGTGCTTCCGCTTGGCATACTCATACCCTTGAATTTG  
AACCAATCTTCCGCTGAAAACAAAACCAATCACTCCCACAAAAGCTCCAGATATCTCACA  
GCCAGAGTTTTTCTTTATCTTTATTTACTCATATGGGAAAAAAGTAACACAAAAAGCAA  
AAACAAGAAACCAAAAAGAACTCCAAAATCCGGCCTAAACTAAAAAGGGGAAGGAAGGGC  
AGACCTATGGGCAATCAAAGAAGCTTTGGTAAATCATGTTCCCTCTTTTCAAGATTTAG  
AAAAGTAAAAGGAAATAGCAAAGAAAATCCAGGGAAACCCTTTTGTGTGATCACAGGACA  
CTTGGATCCATTTTTTTCCAAATCCCATTAATCAATGCAACAAAAAAGGGGAAAAACAT  
AAATAGAGTTAGATGGAGAAACCACGGAATTGGAAATTTCTCAAATAAAATTAATCATT  
TTTTCCAAAACAAAAAAGGGGGC

>RMYB35

TTTCCCGAACTTATTTGACCGTATCATCCATAATCAGCTTCAGGATATAGCATCAGCGTT  
GGGTAAGATACTAATAGTCTCGGTAGTTGATTAATGAGCACAACATGCTTTTATACAGTT  
AGTCTCCCTGCATTTCGGGTGTGCTTCTTGACACTTTTGTGCATAAATTGGCATGCGGTG  
TCTTTAAAGTATCCGCTAGTGTCTCTATGTTTGTACATCTTGTGTGTGGGGGGAAAA  
AACTAGATACGGGAAATGTTACAGAATGAACTTATATAAACCTCCTTTTCATAAATATTG  
AATAGATTGTTGTATAGATTTGGGCGCTACTCAAGTTAATTTTCGTTAATTAATATTAA  
TAGCTTTAATATATCAAACACACATTGATATAATCCCCACAATAACACTCCCTCAAATA  
CAATTTCAATCACAACACCAATCTCTCAATATAACCAAACCAAACCATCACTCTTAGAAA  
ACCAATCAAATATTGAAAACCAATAAATCATGATGAAGACTTGGCCTAACCTAACCAAG  
ACAATACCAAATCATCAATCAAGGTTAATCTATGCATCCTCCTCAAGCTCAAGAAAGCTC  
TTCACCCATTCCAATCCACACGTCCCCTGTCTCGAGAAATCGAAGAGCTCATCTCCCTCA  
ACATCGGAAGAACCCATTCCATCCCCACACTCATCCGCTTCGTCACCATCTCACTCCCA  
CTTGCAATCTCCATTGATGAGGATGCTTTCTCACGTTCTTGATCATCGTCATCGTCATCG  
TCATCATCGTCATTGTCCTCATCCATTTCTTGATCAGTGCCACCGTTGATGTGGACGGC  
AGCTTCTCCATCAGCTTGGCCTTCTTCCCTCAGATGCGCATTCCAGTAGTTCTTTATCTCG  
TTGTCCGTTCTCCCCGGAAGCCTCCGGGCTATCAACGACCACCTGTTTCCAGAAGCCTG  
TGAAGCCTGAGTATCAAATCATCCTCCGCTTCGGAGATGTTGCCTCTTTTATGTCTGGC  
CTCAGATAATTCAACCATCTCAGTCTACAACCTTTCCACACCTATTCAAGCCTGACTTC  
ATGGCAACGGATTTCCACCTCCGGGGGCCGTGAATCTCTATGAATTTGGCGAGTGTGGCG  
TCTTCTTCGGGAGTCCAAGCTCCCCTGTTTCAGTGAAGATGATGATGATGGTGTGATCTC  
TTCTGGGAAGAGCCCCATCATCGTCGTCGTCATTATCATCATCATCGCCGCCATTA  
CCATCGTGATCATGAGGAAGATGGTGGCGATTCTTGTCAGCCATGGGATTGGGATTGGGT  
GGGCCTA

>RMYB36

TGGGTCGATGCCATCCGTAGAAAGGCGTTTCCCTGATGTGTGTGTTCCAGTAGTTCTTGAT  
CTCGTTGTCCGTCCTCCCGGCAGCCTAGCTGCTATGGCTGACCACTTGTTACCAAGGAT  
GCTGTGGAGTTGAATAATTGTTTCTTCTTCCCTCGAACGAAAATCTGCCCTTTTGTGTC  
CGGCCGAGATAATTTCGTCCACCGTAGACGGCAGCTTTCCTCCGACCGCTGCAGCCCAGC  
ATTCTTGGGAAGGGTTCTCCAGTTTCCATATCCATGTTTCTGAATATAATCAATGAGCTT  
CTGGTCTTCTTCTGTGTCATGGCCCTTTCTTGAGTCCATTTTTGGCACAGCAAGGTGT  
TCTTCCCATGGCATCCAAATTAATAATTTTACCAATTAAGCTGCTAATGATAGATGTTT  
TCTTCTACTTACAATTAATTTTGGAGGCACATGCAAATGGCAAAGTGACAGGCTAGAAAT  
GTCCGTATATATATAGGTGC

>RMYB37

TCCACTTTGGCCTGATTCTCATGACCCTTTTCTAGCTTCTTCTTCAAGTGCCTGTTCCA  
ATAGTTCTTGATATCGTTGTCGGTCTCTGAGGCAGGTACGACGCTATGGCAGCCATCG  
GTTGCCGAGAAGCGCTTGAAGGTGGATGATCATCTTCTCCTCATGGTCAGTGAAGTTTCC  
CCGCTTAATTCCCGGCCGAAGATAATTAGTCCACCGGAGCCTGCAACTCTTGCTGCATCG  
AAGCAACCCTGTATTGGCCGGAACAGCTCTCCAGTCCCAGGACCATGTTCTGAATGTA  
AGAAACCAAGACGATGTCTTCTTCCGGCGTCCACGGCCCTTTCTTCACCCCTATTTTGT  
ACAGCAAGGTGGCCTTCCCATGTCCCAAATCTCTCAGTTTTTCTTAAAGAGAAAGGAAA  
GGGCTTCAAGATTGATTGTTTTCCCTTGGCTTGTAGTATTGTTGATATATATGATGAGA  
AAAATGAAGGGAGACAAGAGTCTAAGTGAGAAGAGAAGGGAATGGTGTAAGGGAATTATA  
TAGAGAAGAGACCAAAAAGGAGTTAT

>RMYB38

TTTCTCCTCTTGAGCCTTTTTTCTCATGTGAGTCTTCCAGTAGTTCTTAAATCTCGTTGTC  
CGTACGACCAGGTAATTTCTGAGCAATCTTGACCACCTATTTCCCATTTGGCGTGGAG  
TTGAAGAACAAGGCGTCTTTCGTGAGGGGTCACTTGCCCTCCTGAGGCCCGGGTGAAG  
GTAATTCACCCAACGCAGCCTGCAACTCTTCCCTGATCTTCTCAAACCTGAACTTTGGC  
GATGAAATCCCATCGCCGGTGCCAAACAAGTTCACGTACAACACCAGCTGAGCATCTTC  
TTGTTCTGTCCAGGGACCTTTTCTCAACTCATCCTTCTCCATATCCATGTCCTTGGGTTA  
ATTCTCTCTGCTTCTTCTTCTGTGGCCTTAGCTACTAGCTTCTTGTCTTCTTGAAT  
GATCACTTTATGGTTGCCCTGGCCTTTTTATATATATGTGTGCATAAAGATTCCTTTAAA  
CATTTGGCAATATGTTTGTGGGGGAATTTGTGTAATAATGTAATGAGCATATGATTGGGG  
AATCGTGGCCGTACATTTGTTATTTGCGCGTGGATTCATCTTCTTTCTTG

>RMYB39

CTATGGCACCTGTATGAAAAATATAAGTGTGTTCAACTAAATAGTATATGCATACCCAAA  
TATAAAGAGTGCTAACAAATTAAGGATACAGTACACCATACTCGAGCAAAGTAGTTCAA  
CCAAATACATAGAGATTAGAGAACCATCCAGCCACAAGGGCTTCTGCAGATTTGAAGGT  
TCAGTTTCTACATAATCAAAGCCATTATTGAATCCTCCAGAAAGCATAACAGTTTTTCAG  
TATATAGTCGAGGATACAAGGCAGCACGACCACCAGTTCGATGGGGTACCTAGACTAG  
ACAATGCAGGATCGCCTTTACCGGCCATTAGGTTGAGCTGCAGCAACCGATCTGCATCCC  
ATCTGCTCGAGAACTTGGTTCAGTCGGATGTGCTTGGCTGCCATTGCTCAGCCAGTTT  
TGCTCTTTTGCCTCCGCTTCCCTCCTCAAGCTTGCCAATTGTTCTCTGTACTCAGTTTCA  
ATCCGTTCCAGTGTAGCCTTCTCCTTCTCCCTTAAAGCTTTCATTTTGTCTCAATGTCT  
TCCATTTTCTCCCTCCTACGGTTCGCTTCTCTGATTCCAGCTGCAGTTCGACCCTTTT  
AATCTCCACGCAGCTTCTTTCTTTTGTGCGGCCAGTGCAGCGGTGCCCTTCTTCCAATTCT  
TTACAGCACTCAACTAGTTCAGAAGCGACTGTGCTCTCCCAACCATAGGGGTGATCCCA  
AGTGAATGTATATTGTTTCATCATCCCGTGTGTTGCGCTATCAGCTAATCGATCGGGAGGT  
TGTAGCCACGGGATTGGTGGTGTAGGTGGCACAGTCAGGGGAGAAAGGCTTAATGTCACC  
GATGGGGAAGGCGGCCCTGACAGTCGCGGTCTGTGCTGGAACCTCGCTAGCCATGGAGGCAGC  
ACGGAGGGTGCCGAGGGGGCAGTTTGTCTCCGTGGAGATATCCACCATTGGAAGCCGGC  
ATTGTGATCCCCGGCACAATATGCTCCCTGACAAGCTTCTCGCAAACGTCTCCAAAATA  
TGATCGTACTTCCCTTCTTCAATCGGCTCAATTGTCTTGTATTCTCCTTCTGCTCGCGC  
TGCTGCTTTTCTTTGAACACTTCCCACCCTTCCCAGCCTTTTGGCGGTTTCGACCAGGG  
ACTTCAGCCGCAATTTTTTTCCATTTGTTGCCGTGCTTGGCCTGCAGACGGATGACAAGT  
CGCTGCTCCTCTTCAAGTATGATCCTTTCTTATTCCGGGTTTGGAGATAGTTCTTCCAC  
CTCTCTAAACAGGATTTGCATCCCGGTTGAGGGGTTGGTTCATGCGCTCTGACACAAGG  
TGCCAATCTCTCGGTCCATACTGCTTACATACGCACGCAACAAAGTGTCTCTTCCAGT  
CGCCAACGCTGCCTTTCCTTCAATTTGTGCGACGCGAGCTCTGCCATTGCCTCGAACTCT  
CATAGCTATCTGATAACATAGTTAGAACAACAAAATTGCAGAACATAAACTACATTGCAA  
GATCAGTTATTCACAGGATCCATTGAATACTTATGACCATTGCTAAACAGGACATATTCC  
CAAAGCATTTCAACTTGACGGAACCGGACTGTATAAACTGATGATTAATTATTTTATTA  
CAGGACATTCAATTGACTGAATAAAAATATCCATAAAAGAAAGTAATGGATAAGGAGAAG

AGTAGAGATCTGGGAAATCTTTAAGAAAAGATAAAATTCATATCAATTTTTTCATAATTCAA  
GCAAACCCTAATGCTATATCAAAATAGGAATATGTATATATAATAAAAACAATACGGTATG  
ATTGTCACATCTCTGGTGATGATGAAACCTCTTCATTCTTTTCAATTATTTAATTATCAT  
TCATATAAGCCAACATGCCAACAAAGTTAACATTTGCATTTAATATTCTTCTCAGAAACC  
AAGGTTACAAACATCCACACAATAAACTAATCACCTCAAGGAGACAAGACAGCAGTATAT  
TAGCTTCACATTTGTCTCCATATATGTTTGCAATAAATTATGCAAGAAAGAAGGGGGGAT  
GAAACAGGGGCAGCTATCTGGAACAAGGCAAGAATGAAAGGGGGTGTCACTTTATCTTC  
TTAATAGAAAAACCAAAAAAAAAAAGAACACAAAGGCACACCAAAACAAAAGCTCAAATTGAT  
TTACCAGAGAGATATCCCACAAAGA

>RMYB40

TTCTTCTTTTGCCTCCTCTCTCTTGTGCGGGCATTTTGTTCCTTTTCGTTTTAGACCC  
TTGTTTGCCAGATCTTTCATATGCTGAGGGGGGAAAAGGAAAAGAAAAGGAAAAGGGGT  
TTCTTTTTTATTTGTGAAGACAGCTCTTGTTCGAAAATCAAGAAATGGGCTGTGGAGAGA  
CCAGGATTTCTTGAACATTAATAGCTATGAAGAGTTCGAGGCAATGGGCAGAGCTCGC  
GTCGACAAATGAAGGAAAGGCAGCGTTGGCGACCTGAAGAGGACACTTTGTTGCGTGCCT  
ATGTGAAGCAGTATGGACCGAGAGATTGGCACCTGTGTGAGAGCGCATGAACCAACCC  
TCAACCGGGATGCGAAATCCTGTTTAGAGAGGTGGAAGAATCTCAAACCCGGAATCA  
AGAAAGGATCACTAACTGAAGAGGAGCAGCGACTTGTGATCCGTCTGCAGGCCAAGCAG  
GCAACAAATGGAAAAAATTGCGGCTGAAGTCCCTGGTGAACCGCCAAAAGGCTCGGGA  
AGTGGTGGGAAGTGTTCAAAGAAAAGCAGCAGCGGAGCAGAAGGAGAATAACAAGACAA  
TTGAGCCGATTGAAGAAGGGAAGTACGATCATATATTGGAGACGTTTGCCGAGGAGCTG

>RMYB41

ATTTTCTTCATTTTTTTAGTTTATTACGGCCGAAAAATAAACAATTACCATAAAATGAATG  
ACTCAGATCACCTAATCCTTGTGAAACTGAGAACCACATTGTCATCAAATATGTCTTGT  
AATGGTGTCTGGTCTCCAATTTGGTGCCCCATTTTCGGTTTGGGATACTTACAGTGTAAGT  
TATTTTAGTGGACTGTTTCTATTCCGGACCATTCTCAATGTGTTACACAAAACAAGTAAA  
ATCAAGAAATTGGAATTAAGCTGAGAGCCCCATAACGATTATATTGCTGCAAACAATGAC  
AATAGTTGATAGCCCGAGTGATCTATCCATAGACAAGAGTGGAGTGATAGAAAATGTCTT  
ACCATTTGAACTCCTTTGCAATTTTGAACAGATTTGGTTTTGCCAATTAATGTAGTTAA  
AAAATGTGAAAGGAAGAAGTGAACACTGAAAAGCGAAGAAACAAATTATACTTAGGGGAC  
TGACCTCAGTCCAAAATTCAGATTTGTAACCATTGACCATATTTAGATATTCATTGT  
GTAGATTGACTGCTGCTTTAGTTTTCAGAAGATGAGAAAAATGATTGTCGAGTAAATCAG  
GCAAGCAGTTAATGAGAAAGTGCAAAATGGTGATCTCTATATTTAATTTTTATTTGGCAT  
CTCCTAAGTTCGTTTGTGAAATGAAAATTTTTCAAGTGAACATCGATTCCCCACTGG  
ATTGGTGGTTGGGCTGAGTGGTCAGTGATCACCCTTTCCTCTCATCTATTTACAGTAGC  
CAAATTTATCCTCTCTGGGACTCTTCCATGGCCATCTACCATTCAATTTTCTAAATTG  
GATCATCAGCTCACACACAGACTTCACTCTACACTCCATTTCACTTCAACACCGCATCAT  
TCCGAATCGCGTCATTCTGCACTCCGAATCCATTCTGCTCAATGCCCTCCATGTAATTCC  
TCACCTCCTTCTCACCATCTCCATCATCACCGCCAGGAAATCCGGGCTGAAGAAGTAT  
TGCTCACCGCCGAATCGAACTGCATCATCGCCGGCGACGTCATCCCAACAGCCACAGCAG  
GATCCACCGCGTTCGGATTTCGGGTTGAACCTTGGCGGGGACTGATTTAGCTGCTCCGTCA  
CCGTATTCGTATTCGGGTTTCGGATTTCAGATCCGACCCGGGTGGCGAAAGGCTGAGCGACG  
TAACCGGGTTCGGGTAATTGCAAATCGGGTGGAGAAAACCCGCCGCTCTCGCAATAGGCC  
GAAAACCAGGTGACCCGAATGGCTCACCCCGCTCACATCCGAACCGGACGACGGCGGGC  
TACCCGGATTGAAGCAGAAAACCTCCGTCCCCGGGCCGACGCTGGCGGATCGCTTACGCG  
GCGGCTGGGCGTCGGGATCAAACGCCGCGTTTCAATCCTCCTCCGACATCGACACGCACT  
TCCGCTTACGCGTCGAATTCAGTGATTCTTAATCGCGTTGTGCGTCCGACCCGACAGCA  
GCCGCGCTATGGTCGCCCACTTGTTCCAAATTTGGCGTGCGCCCGGATGATGGTCTCAT  
CCTCCTCCGGCGTAAAGGCCCGGTGCTCCACCTGAGGCGAGAGCTGGTTGCACCAGCGCA  
GGCGGCAGGACTTGCCGGAGCGGCCGGGGATGGATTTGCAGATAAGCGACCAATTCCTGG  
GGCCGTGCTTCTCCACCAATTTCTGGAGCAGTTGATCCTCCTCAGGGCTCCAGGGACCTT

TGATCCGCTCCATATTGGACATGGCAAAGGCCAAAGGGGACTGAATAATAACAAGAATAA  
GGGTTTGGGGGAATTTATACAAAAGGGGGGAGAAGGGATAGAGACGAAGCAGGGGTGGGAG  
GCAGTTGGGAATAGCTGGCAAGGGACACGCGTCAGCCGGTGAGGGGGAAGGACGGACT  
AGG

>RMYB42

CATCACTTTTTAGAACAAGAATGCCATTTGGCATTGGTCACAATCCAAGTCAAACCTAG  
TCACAGTTTCTAAAGCTAATTTTGATTTTAAAACATACAATTGTCACATAACAAAAACAA  
TGGAGATTACATAAGTGGGAGAAAAAATTATGAAGCAAAGAAATTGGTGTAAAAGAAAAAC  
AAGAGCATAAAGATGGTTGTTATTTATTTTGAATGAAAGAAAAAGGTCTATAATGCCAAA  
GAGTGCATTTTGTAGTGAATGCTGGGACATATAATTTTCGCACTTCTCCTAATTATTTGT  
TGTACCATGGTAGCTAACTCCGGGCTAAACAAGGAAGTTTTGGACGCCCTACCTTGCTCG  
AAATTGGGAATGTTTCGACAAATTTATTTCAAGGGGAGCTGAATTTCTAGCAAATCCCGGC  
AAACTAAGACTTAATTCAGTCAAATCAACATTATCCTTAACCGGCGGAGTCGGAGGATCC  
GCCGGTATATTCTTCTTATGATCACTATCTCTGGAATCAGAATCCATCAAACATGAACTC  
TCCGATTCATAAATTATGGCAGCAGAGACATCTCTGTTATCCAATCGCCTCAAGGCTTGA  
GGCAATCGGGCACTGCCGCCGTCGCTCCTCCCGAGTACGACTTCCGTTTCAGCGTCGAA  
TTCCAATGATTTTTTACGGCGTTATCCGTACGTCCGGTGAGCATCTTCGCAATCGTCGCC  
CACTTATTTCCCGTGCACCGCGTGCGCCTGAACAATGATCTCATCCTCCTCCTCCGTGAAC  
GGCCGGTGCTCCACCTCCGGCGCCAGCTGATTGCACCACCGGAGCCTGCACGATTTGCC  
GATCTCCCCGGAATCGACTGGCTTATCAGAGTCCAATTCTCGCGCCGTGCTGCTGCACA  
AGTTTCGTCAGCAATTCATCCTCCTCCGGACTCCACGGCCCCTTCACCCGCTCGGGAACC  
GCCTCCGGAGCCACCTTCTTGGCCTTCGCCGCCATGAAATACAATAACAAATTTGAAAAA  
CCCTAATTATAACTGAATTTGTGTATATATATATATATATATTGAATTTTGTAAAAT  
TGTTAT

>RMYB43

GCAGCTATCAGTAGTCATAGGATTGCCTGTGTTGGAATTGGGGGAAGAATTAACAGCAGC  
ATGTTGTTGTTGTTGATGTTGTTGCTCATGACTGGCGTCATTACATGAGTAAACATGATG  
TCCACCTGGTCTTGATTGGATACTTGTTTCATGGTAATAAGCAGTGGTGCAGCCTTTTGA  
ATTCTCCTTTCTTTCTTGTGCACTTGAGTAGATAATTATTGACACTATCCCACTTGTC  
TTTGCACAGCACACCAGTCTGTATGTCCATAACAAGCCATTTTGGTTGCTATTTCTC  
CCACAGAACTTCTCTGATGATACCCCTCTTTGCTGAAACTTTGCTTCCATTCTGACCG  
CAGCTGAATCAGCCTACTAATCTCACTCTCCGGCCAGATCATATCGCCTCCCTTTGCTGA  
ATTAGTCATCGTTTCGCTCCCAATATCCTCATTGTTGTTCTGGATTTGATTCTCCGCCCC  
TAGGAGATGATTATCCTTTCCAGTGAGCTTGTGAAGTGCTTCCATTAGGGCAGCGTCGCG  
TGCTTCGATCCAGGCTCGTTCACTAGCCCAGAATTTTGTTCCTTCTCCATTCTAACGAT  
GTCTTGTGCGCTCCATTCTCCTCTCTTACCATTCTTTTCGTGCTCCTTTTGTCCATTGT  
CTTCATCATTTTCTCCATCCAGACCTCCTGTTTGTCCATCAATTTCTTCATTTGTAAATC  
GATGAAATCCCGGATTTTAACTTTCCACCCCTCTTCCCCCTCTTCTTGTGCTCGGATC  
ATCAGCCTTATCGTTGCCTTCGTTGAGATCAGTGTGCTGACGAACTACTATCCACTTC  
GTCAGAATAATTTCGAGAGACTAAGACTAGTGTCCGAGAGCTTCTGCCCTTGTAATGATTC  
CTGATTGGCTCCTAAAGAAGTGCTCTTATTACCATAATTGTAGTGAAAATTACCTCCCAC  
AAGATTGGCCTGATCCGAAGCCGAAGCTGCACCGTTGGAGTACCATAAAGGGCTTCAAG  
CTGCCTAAAGAACCTGTAATGTTTCCCATCTTGCCTCCAGCTTTGCCCTCTTAGTCTT  
CTTGTAATATTTGTACAAATTTTCAAACCTCTCTCTGCACTTCTTACCCTTCTCTGATA  
ACCGTGCTCCTCAGACATTATCCTTGAGACTTCATCCCACAAGGGGCCCTTTTGGTTTCG  
CTCTTTGAATTTGTGGTCAAGCCTCGATCTGATCTCAAGGAGAGTGAGCGTTTCTGCCG  
CGGCCATCTCCCGGCGCCGCCATCTCCACCTCCGATGTTTAAAGCCG

>RMYB44

TCTATGAGCTGAAATAGATGATGTTCCAAAATCATATTTATAATTTTAAAAAATTAATTA  
CAACAAAAAAGAAATAGTAATTAACATCTAATTAATCCTAAAAATTCTAAGAATAACAAT  
ACTGAAAATAATACTCCTATATAACCGATCCTTGAAAGCTCAACGGCCACCGGAAGCACA

TGGGCTCTGCCGCGTCGATGGTTTACCCGCCCGCAAGAACTCGGAGAAAGGCTTGG  
ACTCAACAGACGAGGAGGAATTGAAAGAGCCACTTTTTGCATACTTCGTTTTCGACGGAG  
AAGGCAGGCCCAACGACAGCTCCAAATCCACTGCGTACGGATCGTTTTCCACCTCCATCT  
TCACCGGCGCGCGGTTGGGACTCCTCCGTTGTGGTGTCTGCTGCATTTAGTATTATCCC  
CAGAGGATGAATTATCAATTGCTGGACTGCTGCGAATATTGTTTGTGGCCTCATTATTG  
ACGTGGCTGCTTGTGGTGGAGTTGAGCGCCGAAAGTCCAGGCAGGCCTTAGCCGGAAGAG  
CGGGGGCGCCGCTGTGGAAGCGGCGGGGGCGGTGGAGTTGAAGGGGCGGTGAGTTTGA  
GGTCAATGCCACGGCTAATAAGCTTGCCTTGTGAGTATTCCAATAATTTTTGATCT  
CGTTATCTGTTCTTCCAGGCAATCTTCCAGCAATCAGGGACCATTGTTCGAAGAAGGC  
TATGAAGCTTGATGATGATTTTCTTCTTTCAGTGAAATTGCCCTCTTGAGATCAG  
GCCTGAGGTAATTTATCCACCTCAACCTGCAGCTCTTCCACACCTAAGCAAACCAGCAG  
CTTTAGGAAGGGAACGCCAGCAGCCTTACCATGGGCGCGGATGTAATTGATGAGGCGCT  
GGTCTTCTTCTTGGTCCAAGCACCTTTGTTGGTGTGGGCTTTTTTCACAGCAAGGGGACC  
TTCCCATGTTCAAATCAAAATATGGACTTTGAACAAATCAAAAAGTTGCTCTTTTTCCG  
TCTATCTGTAGCTGTATCTGATGA

>RMYB45

ACGGCACAAACTAACAAGGTCTCCTAAAGAACATTGTATGTAAGTTTGTAAGAACTAGA  
GGTAACAATTGGCGAATGGACATTTGGAACAGAAGGGGGAAAATCAACAATCCATCATA  
AGCTAAGCCGGGAAACTTTGCAAGTCATCTGATGCAGTTACAGCTAATTAATACACATTT  
TCGATATCATAAGCTTTTTTGGCAAACACACATATCATTATACTATTTGACGAACTTA  
ACTAATGCAGATACACAGATGGGTTTCAGAAAATCGTTTCAATCAAGCAATTTAAAGGATC  
CAACACAAAGTACATCACATTACATATTGACTCCTCAAGAGGCGATTAAATTCGGAAATG  
TGGATGAGACGCACCGGTCTTGACATTATGCCAAGTTTGTGCAGCAACATTGCAGGGATA  
TGCAACGAGCAAGTCACCATGAGCTGAGTCAAGATCCATTAAGTTTGTGCTTGATGTG  
ACTCCGGTCCACGAATACTTTTGGCGCGTATGTGGGCTTTTGCACAGATGTATGCTGAAC  
ACTAGTTTTCTCGAGAAGGGGAGGTTTGTGTTTTCTGAGGAGGAAGTGTGGTGAGATG  
TATGGTCGTTATGTCATGGATGCTTGGCCTCCGTTTGTCTTGGCTCCGGAAAGCTGCCT  
TAGATAGTACTTTTGCATGGCTCGCTACTTGTGTGGGCGTTTTGGATATTACAAAGTT  
TCGTGAGATATCCTCCAGTCCCCTTTTCCGTGCTTTTGAAGCCCCAGGAGAAATCGCCT  
ATGCTCATCCTCAGTCCACGGCACGCCTTTTCTGCGTCTTGATCGCAGGTTCCGGACCCT  
CTTTTCGACACACATCAAACTGCGAAGATCCGCCAATTCATAGGTAAAGGAAGAAGCCAA  
GTATGCAGGAATGGGGAATAAACCTGCCTCTATGTCAGAAACATCTGCCACTAATCCCT  
ATACTGATTTATTACATCATAACAGATTTCCCTGGGATCATTGCTGCAACCTTAAACCA  
TCTGTTGGGTGTTTTCTCGTCGAAAATCGCCAGGGCACTCTCGAACTGCTTGTTTTCTC  
TTTTGTCCAACTGTGGTCAATCCCTGGTGTATGAACCAGTTTGAATCTGATGCCAGGGA  
TGTTTGGCACAAGGTCTCCATTTTCACTCAAAAATCAATCCTTTTTTGGAGGGGTGAACTGA  
AGTGCACCTCAAATTTTGTCTCGGCCAGTTGAGAATTGGTGAATAAGGAAAAACCCTGGT  
GGCAAAATTCCTGAAAAAGATTATGAGGCAAAGGAAAGGGGTGAAAAAAGGAGTTTTATA  
GAAGCCATGAAAAAGGCAGTAGCAATAATCTGAGTGTGAGTTTATGATCAAGACTGTGGA  
GAT

>RMYB46

TGTTCGAATGACAACGTGCCATAAAAAATTATGCTTTTGGCGCATCCACATAAAGATTT  
TACTGCATTGTATAGATTATAGATAATAAAGGCTAGAACAATGGTAAAGAAAGCTATGGC  
CATTAGCCACATAATTAGTTATTTTACAACATCTAGTTTCTCATAAGGGTCTATCCTT  
GAGACTCAGTAGCCTCACTTTACCACAAATTCTAGAAACGCTTCTACAACACCACATATG  
CTGTCTTACAGATTAAGGATGCAGTTTTATCCTATCCTATAGCTTATTTTATTTATT  
ACGAAAAACAAGAACATGTGCGCATTATCCGAAGCCATTTTATGAACATTCGACGGCA  
CTATTGCCACATGGGTTTATCAACATCTGACATCATTATCACAACCTTAGGCAGCAGAAAC  
ATACCTGTCAAGGTCAAGTAAGCACAAATCTTTATTGTTTACTTGTGTGGCACTGGGTAA  
GTAATGGGAGCCATGGTCAATGGGGTGGCCGGGAACCACGGGAGGTCCAGGAATTGGGGCT  
CCAACGCTATAGGCCAAGTGGGGAGGTGGAAGGTTACCGGTGTCCCAACTGCTGAAACG

AGTGGGCCTCCTATTGGTTGTCCAATGGTCGGTGGACCGTACATGCCAATGCCTGGGGTG  
CCAACAGCAGTTTGAGGGAGTGGTTTGGTGGATTTCATGGGTGGGCCTCCTGCAGCAGCA  
CTATTTGTCTGGCCAGTGATGGGAGTTTGGGGCACCGAAACATCTCCATTGTTGACGCTG  
GTGATGTCGTGAATGCTCGATCGTCTCCTGTCTTGTGATAGAGTTCAACCGAATGAAG  
TACTTCTGGGCGTGGCTGGCAACTTGGGTAGGAGTCCTTGTACCACGTAGTTTCGGGAT  
ATGCTTCTCCAGTCGCCTTTCCCGTACTTGTCCAAGCCAAGAAGAAACAATCTGTGCTCA  
TCTTCTGTCCAAGCAATGCCTTTGCGACGCTCTTGATCTGACTTAGAAGACTTGCCTCCA  
TGGCTGGAATCACCGTTCAGGCGTCCAGAATTGCTACTTTTCTTGCCACTGGCTTCATCA  
CCACCGTTACTAGTTGAACCATCTGAGGAAGAACTGTAACAGGGCACCTCTACCACACCA  
GATTCTATTCGGTTGACGTCATCCACTAAAAGTTTCATAGTGGTGTTTAACCTCTACAACA  
GATTTGCCAGGAACATCAGCTGCAATTTTTTCCCATCTGTCTAATCCATCCTCTGGATAA  
GTGGCTATTGCTTTCTCAAAGTGTATCCTGCTCCCTACTCCACACAGAGCTGCTCGAT  
TCATCCGATGGCATCTATACTTGTTTAATTTAATACCAGGTGTAC

>RMYB47

GGACGGCAGCTTCTCCATCAGCCTGGCCTTCTTCCTCAGATGCGCATTCCAGTAGTTCTT  
GATCTCGTTGTCGGTTCTCCCCGGAAGCCTCCGGGCTATCAACGACCACCTGTTTCCAG  
AAGCCTGTGAAGCCTGAGTATCAAATCATCCTCCGCTTCGGAGATGTTGCCTCTTTTTAT  
GTCTGGCCTCAGATAATTCAACCATCTCAGTCTACAACCTTCCCACACCTATTCAACCC  
TGACTTCATGGCAACGGATTTCCACCTCCGGGGGCCGTGAATCTCTATGAATTTGGCGAG  
TGTGGCGTCTTCTTCGGGAGTCCAAGCTCCCTTGTAAAGTGAAGATGATGATGATGGTGA  
TGATCTCTTCTGGAAAGAGCCCCATCGCCGTCGTCGTCGTCGTTATCATCATCATC  
GCCGCCATTACCATCGTGATCATGAGGAAGATGGTGGCGATTCTTGTACGCCATGGGATT  
GGGATTGGGTGGGCATGATGGAAATGGATAAGTTTAAAGTTAAAAGGGGAAGGGATTGGAT  
CACTGGATGGTAGTAGCCGTGGGGTTGAACTTTGAAAGGAATATAACCGCCGGGTTAG  
TGAAGCCCCGACTGCCCCAGCTGGCCAAATCTCCAGAACACGACAGGTAATTGTAGCG

>RMYB48

GATGCACATTTATAATTTAATAAGTAAAACCTAGTGAAATAAAAACAAAACCCATGTTTTT  
TACATATACTCCGATTCATACGTAAACAAAACCAAGCAGAAGTAAAGAACCAAGAAAA  
GAAGAACAAATAAAGTTCTCATTACAATCACTATACCCCCAAATTAATCCCAATTTATTC  
CCTTGGATCTAACGCCCTTAACATTATCACCCCAATCCCTCATTTTATTCCCACCCAA  
ATCAAATAAATAAATCAAAAATTTCAAACCACATATAAAAACCTCCCCTATGACCTTACA  
AAATCTTCAAATTTCACTTGCTTCCCAGTTGCTTATTTTGTCTGCCCTATTCTCATT  
CCATCCTTCAAATATTCGAGTATGCTTTAACACGCTCTTTCCTCTATCCGCTCAAACAAG  
TTTTACCTGTTCAATTCGACCACAACAAGCCAACAGCAATGTGCAAACACCTCACCCCA  
TCGTGGATGATTGTTTGTGCAATTAGCTCGTACTCCCCTCCATTCTCGTCCATCTCAT  
CCTCCTCCTCATCAAATTCATCTTCTCATGCTCGTTGTTCTCGCTCTCATTCTCATTGT  
GATTCTGATCGCGAAATGTAGAATCCTTTTGTGTTGTTGTTGTTGATTGTTGTTAGGAA  
GAGGCCATTGCTGCTCGGGCCGACTAGGATGGGTTCCATATTCGGGTTGTTTGGATATG  
AGGGGTTTCATCGATGAGACAATGCCATGCTTTGCCCTCTCTTTGTATATGGCTTCCAAC  
GGTAGAAGTATGGGCATGTCTTGGAATCTTCGGGCCTCTTCTTATTACTCTCCTTTACTT  
TCTTATAGTACTTATTGATGTTCTCCATTTCTCCTTGCACCTCTTGGCGTTCCGGTTGT  
ACCCGAGCTTCGCCATGGCAGCTGATACCTCCTCCCATAATGGACCCTTGGGCGCGTTAT  
CTTGGTACTTGAAATCCAAGCTTGTGCGGATGTCAATCAGGGCCTGGATTTCCGGCTTTCG  
GCCACCTGGAGGAACCTCCCCGGCAAGACACTCTCCCCACCGCCGCAATTGTCCGTTTTTG  
AAGTCTCTACAGCTTTTGTGTTAGGAGGATTCGATTGCTGAGGTTGTTGCGGTGGCGGTG  
GAGGAGGAGGTTTTGCAGGCGCTGGCGTAACCGGCGGGATTTGGGGATTATTTGGTCCG  
TGACCTTCTGCAAGAATGCTATCAATGCAGCATCCTTAGCAGCGGCCATGGATCTCTCCC  
GAACTAGGATTTCTGTGCTCCCGATTATCCTGGCCGTCCTCTGCACCCGCCAGGCTTCT  
CCCTGGCCGTCCGATCCTTCTCTATTCTCCAGAGTTTCTAGAAACTTGATCTGCAGCG  
CCTCCTGCTTCTCCACAACCTCCTTCATTAACCTCTCGAAATAATCCTTCCATTTCTTT  
TCTTCCCCCGCCGCGCTGGATATCCTCATCGGAAGACGTCGACGACGACGAAGTCTGTCG



ATTCCGATCGGAAGATGCGAGCTTGC GGCGTAATCTGAGAATTTGTTGCCGCAATTGTGT  
GCTGGTGCTGGATGAATTGCGGCGGCTGAGATTGCTGAAATTGAGGAGAATTC AATTGGG  
GATTTGTGATTGGGTGAATTACACTCAAAGGGGTTGGACTGATTGATGAAACAGTAACAT  
GTGATGGCATTGTAGATTAGGAGGAGGGGCCGGAGCCGCTGGAGCCGCCGAGCGCGGGC  
GCGCCGGGGAGTTTTCCAGGGCTTCCAATTGCTCAAAAAACCGGTAGCTTTTTGCCGTCCG  
ATTTGGCGGCCCGGCCGCTCCTTTGTACGCTTGTGGTATTTGTACACGTTCTCGAACTTCT  
CCTTGCATTTTTTGGAGCTTCTTTGGAATCCAAGACTCGCCATTTCTCGAAACTTCT  
CCCAGAATGGGCCTTA

>RMYB49

AATATGGCTAAAGACATCAGCAAATCGCCCTCAGAATAAACGTTATTCAAACCATCAACT  
AAGTTGAAAAAATCGCGAGTTTTCTTGCAAACCAAACCTAAGTAAAAAGCATCAATGAG  
AAGACAGGGCACCATCCAAGTTAATCTGATCGACAGATAGGTAGAACAGAATTACACTGT  
CGATGCTCAAAC TATTGTTTTGTTCATCGATACAATATGCTCAAAC TATACGTGTAATA  
GCAAATGCTACTAAAACTATAACCCTTATTGATACATATGTATGAATTACAAGGATATT  
TCAGACAATGGCAGTTCATTTTTTTGGGTTTTTTTGGCAATTGGTGACTAATGATAATGA  
TATCTACATACTATGGATGAAGCATTCTTATGAAATGCCTTCCTTGGAGTGGAAGTACGT  
TCGATTCTTCTACCTGGGAAGCATAATGTTCTTGGATGATGCTACTTCTGATAGCACGCG  
ATTGATTTCCGTTGTTTCCAGAAACCTGTCATGAAAAAAAATGGTATTGAAGTACACAAT  
CTTCATCTGCAAAACGTTATCGATGATCAATCAAAAAGGCCCAACAAACTGTAGAAGTT  
TTAAGGATTTTGTGATTCCAATTACAGAATAACTAATAGTTTCTGCAGCTAACTTTACAG  
CTCTTTTCTTAACCATAGCCACAGAATGGAGGGGTTGGCGGATTCAACTATGCCGAGTGG  
GATGCATCTGGAAAATCGTACCAGGATGTCCTAACCAGAGGCCACGCTGGTCGAACCCCT  
GCATATGATGCTCATT CAGGTTAACTCCAAAAGAAGAAGTTCCTTGAAGGCCAGTGATCA  
TTAAGCCGCCGTCCTGTGGGGTGAAGCCCATATTGCACCCGGGTTGGTCAGGTTGGAAT  
CATACGTTGCCCTGACCACAACATTACCACCCAAATTGGGGTGAGACTGCAGAATCATAT  
TCGATTTCTGTGGCGAATGCGAGGCGTCCTTATCCTCCGGTGAAGGAGACTTGTTAGTTT  
CATCAAGATTGACAGTGGTGATATCATGTATGCTGGACCTCCTCTTATCCTTCCCGCCCG  
AAAGCTGCCGATAAAATATTTCTGAGCATGACTGGCCACCTGAGTCGGCGTCTCTCGTGG  
TCACGAAATTGCGGGAGATGTTTCGCCAGTCCCCTTTTCCGTA CTCTTCAGTCCCAACA  
GAAATTGTCTGTGTTCTTCTCAGTCCAGGGCACTCCCTTCTTCTCTCATGGTCCGAAC  
ACCGCGTCGACGAGCCGCGTTTGCCGCCTGGACAGTAAATTTGTTTCAAACCATCATAGC  
CATGATTGGTCACCCACTCCAAAGTGAAGGAATTATTGGAGTAGCCCGGAATTGGGATCA  
GCCCTGCTTCGATATCGCTCACATCTTCGACCAATTCCCTGTA CTGTTTCATCACATCGT  
TGACAGTCTTCCCCGGAATCATCGAAGCCACATTCTGCCACCCGGTCGGGAGTGTCTTAT  
CAAATAATGCCAGAGCATTTCGAACCTCTTATTCTCCTCAGGAGTCCATTTTCGCGACAG  
TACTCCCTTCGAACAACCAATTTCGAATTGGTGAAGTATGAGGCAGGAGAGACCTGCCCGA  
TTTCCCTATTCATCGCCAAAAGTTTGGGGGGCAAAAAATAACACCTGAGGAGGCAGAAA  
TATAGGGAGAAAGAAGCAGAGAAGAGATTTGATATATGAATATAATCAGATGAGCATTTT  
AAGTCATTTTGGGGGAATTGAAGAATCTGAATACTTTTTGACACATGGTGAGGAATCTCA  
GAAAGGCTCCCAACTTTCCTAACCCCAAGGAAAATTCAATTCTTCAAGTATTCAACCAA  
CTGAAGAAACAAGGAAAAAGGGCAGATCTTGCTGCAGAGAAATAACAAACCCCAAAAATT  
CTATTACCTCCTCAGTCTCAACTCACCACCCAACTCAAATAAAGAAAAACCCCTTCAA  
TTAAACATTACAAGAAGCATCGGGAAAGGGCTTAAAAAGACTACAATGATAGAAACCCAG  
ACCTCTGTCTCTGTTTCAATAATTACATACCTGAACCAGAAAACAGAGTAAATAACGCAAT  
ACAACAAGGCCCTCAATTCTGAATGGCTCCAACAAATCAAAGGTGTTTCTGAATGATTGG  
TTGGGAGGTGTCTGTGGGGGCTTCAGCTCAGGGCTT

>RMYB50

GCGGAAGAGCTGCCGCCTCCGCTGGATCAATTACCTCCGCCCGGACCTCAAACGCGGCA  
ACTTCACGGAGGAGGAAGATGAGGTCATTATCAAAC TCCACAGCCTCCTTGAAACAAGT  
GGTCATTGATTGCCGGGAGGCTGCCGGGGAGGACGGATAATGAAATCAAGA ACTATTGGA  
ACACGCACATCAGGAGGAAATTGTTGAGCCGGGGAATCGATCCGACGACTCACCGGCCGA

TGAATGAGGCGGCGGCGGACAGGGAAACCCTAAAAACAACAACGACGACGACTATTTTCGT  
TCTCCGGTGGATGTTTCGAGAGAATCGGAAGATCAGAAAATCATTGTGATCAGAAAAGATG  
AGGATCGACGGGG

>RMYB51

GAGGGGAAGGATTAATATTGCTGTTGTTTTCAAGCTTTTTCTTGAGATGGGTATGCCAAA  
TGTTTTTGATTTTCATTGTCTGTTCTTCCTGGCACTCTTGCTGCAATGGCAGACCACCTGT  
TTCCAAGCAATTGATGCAAAGTGAAAATGGTCTCTTCTTCCTCTTTGGTGAAATTTCCCC  
TTTTGATATCAGGCCTCAAATAATTAGTCCACCTCAGCCTGCAACTCTTCCCACACCTCA  
ACAAACCTGCTTGTGGGAAGAGCTCTCCAATTGCCATGGCCATGTTGCTGAATATAAG  
TGACCAAAATCTGGTCTTCTTCAGGGCTCCATGGCCCTTCTTCAGCCCCATTTTTTTCAC  
AGCAAGGTGCCCTCACCATTCTCCTTACTTAATTATGATAATTTGGTATAATATTTCTTA  
TTTTCTATATGGGTTTTAGAGTGAGAAAACTGTAAGGAAGAGGAGAGAGAGAGAGAGGTG  
GTAAGGTGTA

>RMYB52

TTCTCGTTTTGAGTTGATGACTCAAGTGGATCGCTCAAGTTGGAGTTGGAGTTGGAGTCG  
GAGTTTGAGTTTGAGGGGGTTTTCTCCGCCGTGCTGCTGCTTGTATTCTGTAGCTCTCT  
TTCATCAGTCCAACCTTCTTCTTACACTGGCTCACAGTTTTCTGGAAGTGCAGCTGCA  
ACTCGTTCCCAGCGTTGAGGAGTTTCTTTGGAAAGGTTTTTCAGAGCTTGGACTAAACCT  
TTTTCTTGAGCAACAGACCATGAGTCTTGATCTGAACACAAAGCAGTTCATTAACAGCA  
TTGCTGCTGTCTGACAAATTGCCAGGAACAGAAGATTGCCCATAGCTGCACCGGTATTA  
GATAATCCCAGCCATCCTCTCTAGTTGAGAGAGGTGAAGCAATTGCTTGTGCAGGTTTC  
CTTTTCTCAAGGAAGGAGTCAAAGGCTTAGCAGAATCAGGCTTTTGCAAAAGAAGTGT  
TTTGTAGCCTTCAAATCTCCTCTACTGATCTCCCAGAGCCAATATACTCAGATATCACT  
TCCCACCGCCGGGAAGTTCCTTTAGGATATTTCTGCATGCCCTTCTCAAAGCTCAATT  
TCTTCTTTACCCCAAGGCTTTTCAGCTTTGTTAGAAACCTGTCCATTCATATGAATGCTG  
GTGGAGCCATTTTGCAGTACATTCTTCTCATCTTCTTCTTATCCTTTGTTTTGTGATTG  
GATTCAAGTGTCTCTTTGAGAAGTTCAGCTCTCTCGAGACCCTCCTTTCTTTCCAATTT  
TCACACAACCTACTAAGCTGGTCTTATCAAGTGATGAGCACAGACTCTCCACATCGTCA  
TCAGTGAGATCAAGCAAACGTTGAGACAAAATAGGCGTTGAAAGTGTCTTAGACGAGTC  
CGTTCCTTCCGGAGTAATTTTTCTCTTTTCTTCAATTTCTTTTGATTTAAAGCAGCT  
TCAGCTGCTCTTTTTTCTCCTCTTCTTTCCGCTTCTTCTCCTCGGCAATCCTAGCA  
GTTTCTTCTCCTGCAATCTTTGGCCATAAGTTTAGCTTCTTCTTTGTTTCTCA  
GCTTCTCCTCCTTCTTCTTAAATCCTAGGATCCCTTTTATAGGCATTATCAACA  
AGAGTACGTATGCGTGCACCTTTCATCTTCCGTGCCTTCTCTGACAGTTTTAAATTTTGC  
CTTCCATCCATCTCCTGTGATCTCGACCTCAGCTTGCTCAAGGTCATACTCATCAGCA  
TGTTGAAATTCTCTCCAACCTTTGAAGGAATACCAGAAATTATAAAAGCTATCCACTTCT  
TTGATGGGCGTTTTATCATCCCCCAAAGTAGGAATAGGCTGGGTTACAGACCACCGCCG  
TTCTCACAATGCAGGGCCAAATACCTTGAAGAAATCCTGTGGTGCACAATCACAAGGA  
ATTTTCATCATCAAACCTCATCCGTGGAATCATAGATTCTTCTCTTCAAAGGATCAATCAAC  
ACTTCATATGCTTCTTGAATTGCTTTAAATGGCCCTCAATCTCATCCTTCTTGGCCTGC  
TTAGCAGTCTCAGTTTCTCCGCAAGCAAAAGAGCAGCCTGCTTGTGAGGATGATGCCTC  
AGAGCAGCCTCCCGGTAACCTTCTTATCTGATCTTCTGTTGCAAGATACCTCAGATGG  
CTCAATCCTAGCAGGGCATAATGGTCTTGTGTTTCGCTTCCCAGACTTCTTCTTTCCC  
TTATTTCCATACGAATCTGATGATTCTACATAAACATGTTCCCTTCTCATTGGGAGCACCC  
TTTCATCATCATCACCACATGTATCTGCTTCCACACAGTGGCCTACCAACCTAAGAGCA  
GCAGCATTAAACGAATGCCAGCAGGCTCAAGTTTCAACGCCTTGACCGGAAGGCTATTG  
GAGGATACATAGATTGGTTTACCATCCACAATTTCTCGTGGTAAGTAATCAGCTGTATG  
CTTTTCCCAGAGGCCATAGCAACTAACAAGCCAAGTGGACAGGATCCCAGAATCCAGCA  
AGCTGCCGATTAATGCGGAGAGTGGAGAATTTGATCGATATTAGTTTGGCATGAATCAAT  
CGCGATTCCGCTCCGCCGACGATGATGGTGAAGGATGGATTAGACGATGATGGTGAAGG  
ATGGATTAGAGCTAGGGTTTTGGTTTAGGTTGGGTGAACGGCTTGTGCAAGGAAGAGA

GAAAAAACAGGGATTAAGGAAGGCGTCCGGCAATTTACCC

>RMYB53

TTTTGGGATTCTCATTGAGTTGATGACTCAAGTAGATCACTCAAGTTGGAGTTGGAGT  
TGGAGTCGGAGTTTGGAGTTGAGTTTGGAGTTTGGAGGGGTTTTCTCCACCGTGCTGCTGC  
TTGTATTCTGTAGCTCTCTTTCATCAGTGCAACTTCTTCTTACACTGGCTCACAGTTT  
TTCCTGGAAGTGCAGCTGCAACTCGTTCCAGCGTTGAGGAGTTTCCCTTGGGAAGGTTT  
TCAGAGCTTGGACTAAACCTTTTTCTTGGAGCAACAGACCATGAGTCTTGATCTGAACACA  
AAGCAGTTCCATTAACAGCATTGCTGCTGTCTGACAAATTGCCAGGAACAGAAGATTGCC  
CCATAGCTGCACTGGCATTAGATAAGCCCAGCCATCCTCTCTAGTTGAGAGAGGTGAAG  
CAATCGCTTGTGCAGGTTTCTTTTTCTCAAGGAAGGAGTCAAAGGCTTAGCAGAATCAG  
GCTTTTGCAAAAGAACTGTTTTGTAGCCTTCAAATCTCCTCTACTGATCTCCAGAGC  
CAATATACTCAGATATCACTTCCACCGTCGGGAAGTTCCCTTAGGATATTTCTGCATGC  
CCTTTCTCAAAGCTCAATTTCTTTTACCCCAAGGCTTTTCTAGCTTTGTTAGAAACCT  
GTCCATTTCATATGAATGCCGGTGGAGCCATTTGCGGTACATTCTTCTCATCTTCTTCT  
TATCCTTTGTTTTGTGATTGGATTCAAGTGTCTCTTTGAGAAGTTCAGCTCTCTCGAGAC  
CCTCCTTTCTTTCCAATTTTTCACACAACCTACTAAGCTGGTCTTTGTCAAGGGATGAGC  
ACAGACTCTCCACATCGTCATCAGTGAGATTAAGCAAATGTTGAGACAAAATAGGCGTTG  
AAAGTGTCTTAGACGGGTCCGTTCCCTTCCGGAGTAATTTTTCTCTTTTCCCTCAATT  
TCTTTTGATTTAAAGCAGCTTCAAGTGTCTTTTTTCTCCTCTTCTTTCCGCTTCTTT  
CCTCCTCAGCCATCCTAGCAGTAGCTTCTTCTGCAATCTTTTGGCCATAAGTTTAGCTT  
CCTTCTTTCTTTGTTTCTCAGCTTTCTCCTCCTTTTTCTTCTTAAATCCTAGGATCCC  
TTTTATAGGCATTATCAACAAGAGTACGTATGCGTGCCTTTCATCTTTCCGTGCCTTCT  
CTGACAGTTTTAAATTTGCCTTTCCATCCATCTCCTGTGATCTCGACCTTCAGCTTGCT  
CAAGGTCATACTCATCAGCATGTGGAAATTCTCTCCAACCTTTGAAGGAATACCAGAAAT  
TATAAAAGCTATCCACTTCTTTGATGGGCGTTTTCTCATCTCCCAAAGTAGGAATAGGCT  
GGGTTACAGACCACCGCCATCCTCACAAATGCAGGGCCAAATACCTTGAAGAAATCCT  
GTGGTGCACAATCATAAGGAATTTATCATCAAATCATCCGTGGAATCATAGATTCTTC  
TCTTCAAAGGATCAATCAACACTTCATATGCTTCTTGAATTGCTTTAAATGGCCCTCAA  
TCTCATCTTCTTGGCCTGCTTAGCAGTCTCAGTTTCTCCTCCGCAAGCAAAGAGCAGCCT  
GCTTGTGAGGATGATGCCTCAGAGCAGCCTCTCGGTAACCTTTCTTATCTGATCTTCTG  
TTGCAAGATACCTCAGATGGCTCAATCCTAGCAGGGCATAATGGTCTTGTGCTTCGCTT  
CCCCAGATTTCTTCTTTCCCTTACTTCCATACGAATCTGATGATTCTACATAAACATGTT  
CCTTCTCATTAGGAGCACCTTTCCATCATCATCATCGCCTGTATCTGCTTCCACACAGT  
GGCCTACCAACCTAAGAGCAGCAGCATTAAACGAATGCCAGCAGGCTCCAGGTTTAAAGC  
CCTTGATCGGAAGGCTATTAGAGGATACATAGATTGGTTCACCATCCACAATTTCTCGT  
GGTAAGTAATCAGCTGTATGCTTTTCCAGAGGCCATAGCAACTAATAAGCCAACCTAGGA  
CAGGATCCCAGAATCCAGCAAGCTTCCGATTAATGCGGAGAGTGGAGAATCTGATCGATA  
TTAGTTTGGCATGAATCAATCGCGATTCCGCCTCCGCCGACGATGATGGTGTGAGGAAG  
GATGGATTAGAGCTAGGGTTTTGGTTTAGGTTGGCTGAACGGCTTGTGCACAGGGCGAG  
AGAAAGACAGGGATTAAGGAAGGCGTCCAGCAATTTACCAAAGGGCC

>RMYB54

CCCGTTGTGAAATGGAATGAACCAGGATGTAGTATTGCATCGTCTTGCCAGAATGGATCA  
AGGTATGTTGGCCTTCTTTTTGCTGAAATGCCCTGTTTGGAGATCAACTGTGTTGAGAAT  
GGAGTATCAGGGGTAATAACCAAGAGGTTTAGGAGACAGTGGATGTTTCCAGCACTAATT  
GGGTTCCAGGCATGATACCGGTAGGAAAAGATGGCATGCTACCAAGATGCGCAGTTGGT  
GTATCTTTGATGTTGGACTGTTTTTGGTTTTCTCCTAGCGGTACTCAATCCAGTGAAGTAT  
TTCTGAGCATGGCTAGCCACTTGCATTTTGTTTTAGTCGGTACACAATAGCTTGAAGT  
CTCTTCCAGTCGCCTTTTCAAACATCTCCAGGCCGCATAAAAAAGACCTATGCTCCTCT  
TCTGTCCAACGAAATCTTCTGCTTATGAATTTCCAGTGGTTTCTTCTTTCTTAGCTTTA  
TTCTTACTAAAATGATGAGGCAATGGTACCTTTTCGAGACTTGAATTAAGGCTTCATAG  
TGAAGTTTTAACTCTTCAATGGATTTTCCAGGAAGTCCAAACAAACCTTATCCCATAGA

TCAGGATCACCATGGAAGAATGCCAAAGCATTGTCAAATGCCTCATCCTCTTCCTCAGTC  
CAATTCCAACCACCATGTTCTTCATCCTTCCAATGTATTCCCTGTTTCCCACCAATTCTC  
AATGGCATCCCTTTCTTTTCGCAAACCATAATATTGCTTGGATAATGAGGCAAAGGCACC  
TTACCTGACCCAATTGCCTCCACATCATATCTTAAGGCTTTATAGTGATGTTTTACATCT  
TCAATTGTCTTTCCAGGAACTACAACCTGTGAAATTCTTCCATGGATCAGCATCATTGTGG  
CATAGTGCCACAGCATTCTCAAATGCCTTATCCCTCCCCAAGTCTGAGATGAACCACTG  
CAGGCGTTCTTAAATGATGCTTCCACCTCCAATGCCCTGGAGCAGCTGCTGGATGACCCA  
CTGGTGTCCATTCTTCAGGTAACCTGGTTAGGGGAGACTTATTGCTCAGATTAATGGCAAG  
AACTAGTCTGGTTGGCAAATACTTTCAAGAAAAAGGTGCTTGTCTTCAACACCTCATAG  
AAAATTCTTCTATGCTGATTTTCTTCTTAGTCGGTAATTTATTTAGAAGAACCAAACCT  
GTGGGTGAGCGTTGTGTGTAACCTTTGTCCTTTGTCAGCAACAGATCAGACTTGCATACAA  
GTTTGGTGAATCTGGCGCATATAAGTGATTCCAACAGTTCTTTGCTGTGGGCATAGATAA  
TGGACAAAGCAACTTTCTACCCGGAACAAGCTGACATATAATATTGCTCAGCAGCCACAT  
CGAAGTCTGACTACATTGCTCTTGTAACTCTGTAATGAAAGGTAGATGACCCATAATA  
TACACAGATATATACATATAATATGTCTACACTTGGGTGTGTGTGCGCGTGTCTCATCAC  
ACATTGAGTATAATGAGCACCATAATGTCTTGTAAAGTTTGTAGTGAAGAGGGGTGCCCGT  
GCAGTTGATTTGGTTCACCAACTAGTATCACCATATGAATTAATTAATAATGAGAATCCCG  
AATAAATGCCATGCGCCGTTGTTGGCAAGC

>RMYB55

CATGAAGAAAGGAAGAACCCTAAATTGAAATTGGGAATTTGATAAAAACGGGAAGGATGAA  
GAAAACGGCCTTTTGAATAATACCGTTAGAGTGAAAACCTAGAAAAGTTGCTGAATAAACT  
TACAAAGTCGTGTTACTTATATAATAAAAATAGAAGGCACAAATTACAGAAATGCCACT  
GACTGAATATTACAAAACAGCCCCTGCATGCTTTAACCAATTCCTGCAAGGTCTTCATTC  
TCTTCTCTTGCTGTATAACTGTATCATGACAATTAGATTTTGTCTTTTCTACACCGAC  
TAGTTATTTAGATTAGATGTAAATAAGAAAGTAAAGCAGGCTTTACCAGCCCCTTTATAA  
TCCCATTACATTATTGTCCAAATCTATTGACCCACACACACACTTAGTATATAAACTGC  
AGTGATCAACAGCAAATCAAGGTTCAATTTCTCGACCCCCTCCAGCTGCAGCTTCTTTCC  
CAGATGGAGCTGCAAAGCAATTGAGAGGTCGAGGTTACCTGAGGAGGCGGCAACGACG  
ACGTGGTGGAAAGTCTCAGAGACAGCTTTCAAGCAGGCTTGGACGACGACAACATTTTGT  
TGTCGGATGACGGGTTGGCTGTGTCAACGTTGGAACAGGCAGCTGCAGGTCGGGTGGTGG  
CAAACATAGTTTGGTGGATGCGGTGGTTATTGGGATCGATCCCCATTGCAATAAGCTCTC  
TCTTGAGGTGGGAGTTCCAGTAGTTCTTGATCTCGTTGTCTGTCCGCCCGGGCAACCGCC  
TGGCTATTAGAGACCACCGATTGCCAAGGAGGGCATGGAGCTTGATGATGAGGTCGTCTT  
CATCGTGGCCAAAGTTGCCGCGTTTGATGTCTGGTCTTAGGTAGTTCACCCATCGCAGCC  
TGCAACTCTTCCCCTTCGCTGCAACCCTGCAGCGTTGGGTAGGGAGGTCCAGCAGCCTT  
CACCGTGAAGTTTGTATATAATCAATAAGCATCTGATCTTCTCTTTAGTCCAGGCCTCTC  
TGCCTCCGCTCCTCCTCTTCTCCTCCGCTGCTTTCTTCTTCTTCTTACCCTAGATT  
TCCTCATCCTTGACCTCGTACACAATTGCAAGAAGGGAAATCCACCTTATATATACCTAA  
AAAACCAAATTCGGACAAGTAGCTTCTAAGCAAGTCTGGTTGATGGGAAGAAGATATATA  
TATATATATATATATATATATA

>RMYB56

GATACGTAAACAAAACCAAGCAGAAGTAAAGAACCAAGAAAAGAACAATAAAGTTC  
TCATTACAATCACTATACCCCCAAATTAATCCCAATTTATTCCCTTGGATCTAACGCCCC  
TTAACATTATTCACCCCAATCCCTCATTTTATTCCACCCAAATCAAATAAATAAATCAA  
AAATTTCAAACCACATATAAAAACCTCCCCTATGACCTTACAAAATCTTCAAATTTCA  
CTTGCTTCCCAGTTGCTTATTTTGTCTGCCCATTCTCATTCCATCCTTCAAATATTG  
AGTATGCTTTAACACGCTCTTCTCTATCCGCTCAAACAAGTTTTACCTGTTCAATTCG  
GACCGCAACAAGCCAACAGCAATGTGCAAACACCTACCCCATCGTGGATGATTGTTTGT  
TTGCAATTAGCTCGTACTCCCCTCCATTCTCGTCCATCTCATCCTCCTCCTCATCAAAT  
CATCTTCTCATGCTCGTTGTTCTCGCTCTCATTCTCATTGTGATTCTGATCGCGAAATG  
TAGAATCCTTTTGTGTTGTTGTTGATTGTTGTTAGGAAGAGGCCATTGCTGCTCGG

GCCGGACTAGGATGGGGCCCATATTCGGGTTGTTTGGATATGAGGGGTTTCATCGATGAGA  
CAATGCCATGCTTTGCCCTCTCTTTGTATATGGCTTCCAACCTGGTAGAAGTATGGGCATG  
TCTTGGAATCTTCGGGCCTCTTCTTATTACTCTCCTTTACTTTCTTATAGTACTTATTGA  
TGTTCTCCCATTTCTCCTTGCACCTCTTGGCGTTCCGGTGTACCCGAGCTTCGCCATGG  
CAGCTGATACCTCCTCCCATAATGGACCCTTGGGCGCGTTATCTTGGTACTTGAAATCCA  
AGCTTGTGCGGATGTCAATCAGGGCCTGGATTTTCGGCTTTCGGCCACCTGGAGGAACTCC  
CCGGCAAGACACTATCCCCACCGCCGCAATTGTCCGTTTTTGAAGTCTCTACAGCTTTTG  
TTGTAGGAGGATTCGATTGCTGAGGTTGTTGCGGTGGCGGTGGAGGAGGAGGTTTTGCAG  
GCGCTGGCGTAACCGGCGGGATTTGGGGATTATTTGGTCCGTGACCTTCTGCAAGAATG  
CGATCAATGCAGCATCCTTAGCAGCGGCCATGGATCTGTCCCGAACTAGGATTTTCGTGCT  
CCCGATTATCCTGGCCGTCTCCTGCACCCGCCAGGCTTCTCCTGGCCGTCCGATCCT  
TCTCTCGATTCTCCAGAGTTTCTAGAACTTGATCTGCAGCGCCTCCTGCTTCTCCACAA  
CCTCCTTCATTAACCTCTCGAAATAATCCTTCCATTTCTTTTTCTCCCCCGCCGCCGCT  
GGATATCCTCATCGGAAGACGTCGACGACGACGAAGTCGTCGATTCCGATCGGAAGATGC  
GAGCTTGC GGCGTAATCTGAGAATTTGTTGCCGCAATTGTGTGCTGGTGCTGGATGAATT  
GCGGCGGCTGAGATTGCTGAAATTGAGGAGAATTCAATTGGGGATTTGTGATTGGGTGAA  
TTACTACTCAAAGGGGTTGGACTGATTGATGAAACAGTAACATGTGATGGCATTGTAGAT  
TAGGAGGAGGGGCCGGAGCCGCTGGAGCCGCCGAGCGCGGCGCCGGGTAGTTTTCCA  
GGGCATCCAATTGCTCAAAAAACCGGTAGCTTTTGCCGTCGGATTTGGCGGCCCGGCCGT  
CCTTTGTACGCTTGTGGTATTTGTACACGTTCTCGAACTTCTCCTTGCATTTTTTTGGAGC  
TTCTTTGGAATCCAAGACTCGCCATTTTCTGATTATTATTATTGTTATTATTGCAACAC  
GGGCGGCGGAGTAAATATAGTTCTTAAAAATTAATAATCTTGC GGAGTTTAAAAGTGTC  
TGAATGCATAAAATAAGGGTTGAGGAATTAAGTGCAGTGGTGGTAAGAAAACAAAATACA  
AAGAGATAAAAACAAAGGGGAATTTCTTCAAAGTGGAGGCGAAATCCAGCTGAAAAACG  
CTTTCCCTATGGTCCCAGAAGGGACAGAACCACGTCCGATTCAAATCGTGAGTGTGAGAA  
TCAGAATTCAATTCAGTTAATTATTCTGATATCCATAATTTAGTTTTCTGCAATTCTA  
AATTTCTAATCAATTGAAAAGAAGAAGAAAGATTGTTAAACTGAATCCTATATTCTACT  
CATCAAATCAAACTGGTATGCATAATTGAAACCCTTTTTCTTCAAATCCCAAACAAA  
ACCCCGATCAAGATCAATTTTTTCCCATGAAATCTCGAATCAACATCCCAGAGAAAGC  
AAAAACCAAGAAATGATTCCTCCTTGTTTTATTTTTTCTAAAATAAAGATATAAGATCA  
ATGATTACACAATTAATTCATACCTGGAACTTCTTCCATAATGGGCCTTTAAGACTG  
GAGTCTCTAAAAGCAGCATCCATCTCGGATCGAATTCTTATCAAAGCCAATGTTTCTCC  
CTCGGCCACCTGTTTCCCCCTCCTCCTCCTCCTCCTCCGCCGCCGCCGCACTTCC  
TCCACCGCCACGGAGCTGGTGCCGCCGACCTCGCTGCTCCCCCGCCGCTCTCGTGGGTC  
TCCGCCG

>RMYB57

TGTGGGTGTTGGGATCGATCCCTTCGTTCAATTAGCTTCTTCTTGGAGGATGAGTTCAGT  
AGTTCTTGATCTCATTGTCTGTCTCCCGGGCAATCGGGTTCGCAATTTGGGCCACCTGT  
TGCCAAGAGATTCGTGTAATGAAAGGATAAGATCCTCCTCCTGTGAAAACATCCCTC  
TCTTCAAATCAGGCCTCAGGTAATTAATCCATCTCAGCCTACAACCTTCCACATCTCT  
GCAGACCTGCCAATTTAGGCACAGAGCTCCAGCAGCCGACGCCGTGCCGCGTAATGTGGT  
TGAAAAGCTTCTCATCCTCCTCAGGAGACCACAGGCCTTTCCTCAGCTTCTGCTTCACAC  
AGCAAGACTGGTGCCCCATTCTTAATATTTTCTCTGTCTATGTGGAGACAGTGAAGTTC  
ACTGAATTATGACAGCAATGTTTTGGTCCTAATCTCCTGTTATTATATTTTTTTCTTTT  
AAACATAAGCCAAAAAAGATGCTTAAAAAGACATCTGATCAGCCCTTGTGGGGGCTTT  
TAACTAAAAGGATGCTTAGAAACGAAGTGATATTATATCAGAGAGGGGGAGGGGGCAGT  
G

>RMYB58

CTCCATGTGGTAAAAAAAAGTACAAATTAATTAATACTGAGTTATTGACCACTCCCTC  
AATTCATTTATTTATTTCCAAAACGATTAATAAATTTTCAACAGTAACTTTACAAAAAT  
TGAATAAACTAATTTACAATTCACAGTTTTACTTTTACTGCTCCACAACGGTTCGATTC

GACCCCTTTCCAGGACCGGGGCCGGGCGGGCCCTCCATGTGTTTCCCTGTCTTCCAAA  
TTTATACTGTCTGATTACCAGCAAGCCCGACCCGACCCGCCAGCCCAAATCTCTCATT  
TTTACCCCTTTCCGCCGGCTGCTTGTCTCCGACCATCTCGTATCCCTGATCTTCTTCAT  
CATCATCGCCGTCATCGTCGTCGTCGTCATCATCGTCATCGCGATCGAGATCCATGG  
CGGCATCATCCTGTGGCGGCGGCGGTTGCACGGCGGGGAGCGGCCATTGCTGCTCCGGCC  
GCGTCATCATCGGCGGATTCTCCGGCTTAGTATCCGATTTCCCCCTCACTTTGTAAATGG  
CGTCAAGCTGATGGAAATAGGGACAGGTTTTGGAATCCTCCGATCTCTTCTTGCTGCTCT  
CCTTCACTTTCTTGAAGTACTTGTTAATATTCTCCATTTCTCCTTGCACCGCTTCGAGC  
TCCGATTGTAGCCTAATTTCCGATCGCCGCGGAGATTTCTCCACAGTGGCCCTTCG  
GCCCGTCTCTTGGTACTTGAGATCCAGATTCGTTCTCAGCTTAATTAGGGCTTCGATTT  
CCGCCTTCGGCCATCGGGATGAGCTTCCCGGCATTGAATTATCCCAATTTTATCGAAGC  
TTTTAATCGGGGGCGGCGGCGGGCGGAGGTTGTGGAATTTTCTGAGTTATTGGGAGGC  
TGATCGGAATTTGCAGATTCTGCTGATCGGTGACCTTTTGCAGGAAGGCGATGACGGCGG  
CGTCTTGGCGGCGGCCATGGATCTTTCCTGGACGAGGAGTTCGTGCTCCCGATTCAATC  
GTGCCCGTTTCTGCATTCCGACGGCTTCATCTCTGGCCGTCCGATCGCGTTTCGCTTTCT  
CGAGAGTTTCTATACACATCTTCTGCAATTCCTCCTGCTTCTGGATCACGTCCTTCATTA  
GCCTCTGGAAGAACACCTTCCATTTCCGCTTCTCCTCCCGACCCGCTACGCCGCTGCTGGA  
TATCTTCGTCGGAGGAGGTCGACGACGACGACGTCATCGTATTGGAGAACAGGTTCCGGCG  
GCGGCGGCGGACGTCTCAGTGCCTGTGTGTCCGCCGATTTGAAATATTCACCGGCGCTA  
GCGGTGGCGGGGGAGGCTGCAATGCCGAGGGTGGCGCCATACTTACTGGATTGGGGCTAA  
TCGACGATGGAACAGTTGATTTAGGCAAAAGTGTGCGCAATGGCGGTGCAGCCATTGATG  
CTGGCGGCGGCGGAGGAGGTGGAGGAGTGTTTTCCAGGGCTTTTAATTGATCAAAAAAGC  
GGTAGGTTTTGCCGTCGGATTTTGGAGAACGGCCGTCTTTGGTTCGCTTGTGGTATTTAT  
AAACGTTCTCGAATTTCTCTTTGCATTTCTTGGCGTTTCTTTGGAAACCAAGCTCCGCCA  
TTTTCTGACAAGGGTCGCTGTGTTATTATTGCATTCTTACATTCTTGAAGAAATTAACC  
GATCACTGATCCAGGCAAAACAATAATGTACATAACCGTACAGATGAGAAATTGATCC  
AATTGATCCAAGAAATATTTCTTGATGAATTTGGTTAAATTTAAAAATTCAATCTTTTTG  
CTTTTACATTCGAGTCTAGTTTTTTTTGCTATAATTAGCAACAACGTGGTGAAGCCAAAAC  
TGAACCAAAAAGGGCCAAAGCCTGGAATTTACATAACAATACATGATACATAAACA  
CCTATACTTATATGACAGAAATGTGTCTCTGTGTGTGTAAGATTTACTTGAACCTGTGA  
AAAAGCTAGTGAATTTATCTTTTGAATGAAAGTGGAAAGACAGAAACCCTTTCAATCAAAA  
AGTAATAATTCAATGGAATGGGATCAAAGATCAGTCAAGATCCACAAACACCTTTTATGC  
CAAATTCAAGAAAACCCTGACTGCAACTTGAATTTCTTTAAATCTGACATACTATACTT  
ATATATATACATGTAATGTTTATACCTGGAAACTTGTGCGCCATAATGGACCTTTTCG  
GACTCGAGTCTCTAAAAACCGCA

>RMYB59

ATCTGTCCTTGGTTTTCTGAAGTATTTGTTTATGTTCTCCATTTCTCCTTGCACCTCT  
TTGCACTTCTCTTGTACCCCAATTCCATCATCCCTTGTGAGATTCTTTCCCAAAGTGGAC  
CCTTCATCTGCCCTTCTTACTGTTGTAGCTCACCTTGCACCTCATGTTTATGAGGGCCA  
ACACTTCTCCCTTGGCCAGCGGCTGGATATCGGGTTTGTCTTAAACTAGGGATCAATA  
ACCTCGACGGTGTGAGCCTGTTGGATAACCTTGTTTGCATTAATGTGTTGATCTTGG  
ATATTTTGGAGGAATTGGATTATGGTGGCCTGTCTTTCCTCAGCATTGGCTTGATCTTTGG  
CCCTCATTGTCATCGCCGTTTTGCTTCTTTAATCTCTTGGATCTTCCATTCTTCTTCTC  
TGGCCATCCTCTCTTCGTCCCTCTTGATAATACTTGCAGATTAGCTCGTTGTGTAGCTCCT  
CCTGTCGCGCCATGACCTTATCCACAATGGCCTCAAATAGCCCCTCAACGCGCCACCT  
CGCCTTCTTCTCTTCTTTTCGACTTCCCTTCTCTCGTCAATTGCTGGCTAGCCTTTT  
TTGCTGCTTCAATATTCTCAGACACTTTAGCCACATCTTTATCTGCCCTCTCCTGATCAT  
ATACTACAGGGACATCCTTTGTTTCCGACCCGGACCGCATTCCGGCTGAAACCTGAATTT  
CTTCTGGATGATCATGAAGATAGGATTCATCAAGCTCATTGCAAACCCTGCTGTCTTGC  
AGCTTATTACATTGTTGAAGTTCTTGCCTTCAAATTTTTCCCTCACTCTACTGCGCTTC  
TCTTGAACCAATCTCAGCAAGCCTCCTTGAACATGTCCCAGCTGATCAATTCTGGCA

GGGATGTACAGCTCTCCATGCTAGATCTGAACTTAAACAGCTCAACAACCTTCTTCATTGG  
ACCAAGGCACCACAGATCTCTCCCCTTGGGTGATACTATTATCAAGAGAAGAAGAAATTA  
GGGAAGGGTCGAAACAAGGGTTGCAGTGAATGTGATCATCAAGAAGTGATGATGTTCTTG  
AAGCATTAATGAATTGGCTCAAGTAGTCATGATGATCACTGCTGCACATTATTCCAATTC  
CATCAAACATGGTTCAGATTTTCCCTTCTCTTAGCATCTTACTAATAATCTCTGCTGCA  
CTAAAAACCTCTGAAACCAAACCTCGCTAGCTGCCTACCTACCTGTGTTACATCAAGA  
TATTATTTTAGATATGACAGCAAATTA AAAACAAAACCCCATTTTTATTTCACAAGAA  
AATAAAAAATCAGCGCCGAATACATCCCATCCACCACGAATTAGTGG

>RMYB60

TTTTTGTTGAAATTAATTAATTTTTTTTCTTTTTCTGGGTACTCTTTTTCTTTTTCT  
GTTTACAATTTTCCCATTTTTTCCCTCTGCCTGAGATTGATGGATTCAAATCTCCAAA  
AACAAACAAAAGATGCAACCTTTGAGCTCTTCTCATCATCCCTTCTTCCACCCTGT  
ACAAACACCAAATTATTCTTCCCTCCATTCTCTTTTTATATTAACCTAATAAAGAAAA  
CCCTCTCTGGATTACCCAAGAAACAGGGATCATAGTTTCTTGACACTCTTCTGTCATCA  
TCTTCGTCAACTTCGCTGATTTCTTCCAGTTTTTCCCAATTAATTCATTAATTCATTCA  
ATCCTGTTGATGCCAATTCGCTTCATCGCGGCATTCTGAATTGCTCGTTGATATTAGCT  
TGCTGCATACACATGTACTGTTGTTGCTGCTGCTGCTGATTGTAGTGCTGCTGCTGAATC  
TGTAGCTGAATGTATTGTTGCTGATGCTGCTGATTCTGTTGGTGTTGATGCTGGTGCTGA  
AACCTTTGCTGTTCTAATCCCATCATGTAATTCCGCACCTCCGTCCGTATCATCTCCTGC  
ATCACAGCCATCATTTCCGCGCTGAACGGCGCAAAGACCTTGTCTTGAACCGGCGGCGGA  
CTCGGCACCTTGCTAACCGGACTCTGCGGCTGTATCGCGATGGGAATCGCCGCCGGGGT  
GTCACCGGCGGCGGAGGAGGCGGTGGCGGAATATTAGGCTTTGCTTGAACGGCCTCAATT  
TTGAGATTGGGAGATTCAATCGTCTCCGCTCCGGGAAGCGAAAGGCTGAGGCTCGTCGGC  
GGATCATTACCACCGGTTCAATCTGAACCGGCAAAGCGCGCCGCTTCTCGCCACCGGT  
TTATACACAAACGAACCGGACATAACCGGGAGGCTCGAATCGCTCGGTCCGACCCGGAC  
GGGCTGCCGGGTGCCAAGTACAGGCCCGACCCGGGCACGCCGGAGCCGGCGCTAACGGAC  
CTCTTCAGAGGCCGATCCGGCGGCTGGTCCGGCGCTGTCAAAAAAGCCTCGTCGGAGCTG  
AAGGAGGAGCACTTGCCTTGAGGGTGAATTCCAATGATTCTTGATAGCGTTGTCCGGTC  
CGGCCCGAGAGGAGTCCGGGCTATGGTAGCCATTTATTCCCGAACTTGGCGTGGGCCCCG  
ATGATGGTTTTATCCTCCTCCGGCGTAAACGCCCGGTGCTCCACCTGCGGCGACAGCTGG  
TTGACCACCGCAGGCGGCAGCTCTTCCCGGATCTCCCGGGATCGATTTGCTTATGAGG  
GACCAATTCCTCGGGCCATGCTTCTGCACCAGTTGTTGTAATAACTCGTCTTCTCGGGG  
CTCCAGGGACCCTTGATCCGATCCAAATCCATTTTCTTACAAAACCTACCCTACCACCA  
CCGCCGCTCCGCTTGTAATCGCCGCTGCCATAAATCTATTCAATCTTGTCTAGTCTCT  
ACTCTAAAAGACCATGAAATTTGGGAGGAAATTTTGAGGTGGTGGAGAGATTTTACATG  
AGGGTGTAAGGAATGGGGGATTGGTATATATATGGCCATATTGGTTGGGG

>RMYB61

TAATAATAATAATAATAATAATAATAATAATAATAATAATAATAATAATAATAATAGTAATAT  
TTTTTATATATTCAATAATCGAAATAAATCAATCTCCATGGAGCAAGTGCATGGACCAA  
AGGTCTTCCATGCTCCAAAGGTTTTTCATTTCGAGTCCGGAGTGGGGAAGGCTGGGGCCTGG  
AAATGTTCCATGGTCCCAGGAGTGAAAGAACATGCCGGTGAAGAGTAGGACATTTGATCA  
ACAACATGATCCACGGGGCCGTAACCCAAAGAACTTGACTTGTGTTACCGTGATTAGCC  
ATATTACTATTGTTTGTGTTGTTGTTGCTGCTGCTGATAATCAGATGAACTTTCGTTTGT  
GGTTGTTTTATGTGTTTCTGAATTCGAGTTCTCCAAAATCTTGATCTCATTATCTGTT  
CTTCCAGGGAGATATTTTGCAATCTTTGACCACCTGTCCCCACTTAGCATGAAGATCC  
ATGATCAGAAGCTGCTCCTCCGGCGTAATATCCCTCTCTTACGTCGGGCCTCAGGTAA  
TTCAGCCACCGCAGCCTACAGCTCTTCCCGTCCGCTTCAGCCAGCAGATCGAGCAAGT  
GTGTTCCAGACGCCTTCGCCATGATTGGCAATGTAGTTCATGAGTATGAGGTCTTCTTCC  
ATCGTCCACGGGCCTTTCCTCACTTCCACCTCTTCCAGATCTGCGGCATGCCTTCTTATTA  
TCCATTGATTGATCTCACAAGCTATGGCTACCTTGGATATCGAAGATATATATGTGTGTG  
TGATATGTATGGATGAATGTGTGGATAGTTGTGTAGAGAAATTGTTGAATTAATGGGTG

TTTTAGTTATTTGTGTATGTGTGGTGTGAA

>RMYB62

CCGAAAATCATGTAATGGGCAAAACAATAAATATGAAGTACTTAAATTCCTCATCCCTTT  
TCAACCAGAGTCACCAAATACAGTATGTTCAAGTTGAGTAACACCACTATGGTCCATCGA  
GTTTAAAGATTGAAAGTAGAGCCTCGAAATACGTCAAAGTACAACAGCTCCCACCATCC  
ACCCCTTTGCATCATTTAACAAGGCAGCAAAACAACAGAGTAGGAGCGTAGCAGCAGTGA  
ATGGCCAAAAAACA AAAA ACTCTCAAGATAGCTGCATTTCCACCTTTTCTCAAATCCTT  
GATCTTGCCAACAAAACTAACCATCCATGGCACTGTCCAATTCGAATGAATCACCTGTG  
ACACTTGCTCCGCCATCTCTCCATGTTCCGTAATTGGCTGGATGTGCACATCAGCAACA  
TCCAGTTGTTGGCTTCTCGTTTCATCAATGTTGTCCACTTCCATTGAGGTTCTCTCATCC  
GAAATGACAGCAGGCTCAGGTTTCCAGCATCGGAAGAACTGATTGATCCAAAGCAGCT  
TCAGGCTCGACCGGTACCACATCATTGTTTTCTGCAGCAACTTCATGATTGGAAGTTTCA  
AGATCTGGTGCAATAGATTGATTGGTCGCAGCATTAGCAGCTTCGTCCAATACAAGGACT  
TCATCATTGGGAGTTCCGTCATTTGGTGCAACAGACTCATCAAGAGTGTTAATCTCATTG  
ACTTGAGGGTCATCATCTTTCTTCGCAGCATTTTCTGCTTCCTTTTCTGCTTGCAGTCTG  
TATGCACCTACCAAATTCTGAACCCTTTCTAGTTCGGACATTAGATCACCATATCGCTTC  
TGTAAGTGTCTCGAGGTCCTTCTGCTTCTGAACCTCTTCCCAAAGATTTCCAATCCTG  
TGTGTCGCTGCGAGCTGCTCTTGCTTGTGCAGAACTTGAAGCACTCAAGTTCAGTCCCT  
GCAGTGTCCATTTGCTTGAAAGTTGCCTCAATTTGAGTCGAGAGTTTCCCGGCTCGCATT  
TGATAGCCGTTGGTAAGA ACTTTTATCCTCTGCTCTAGCTTTTGTGCTTTTTTTGTCTCA  
TTGTCCATCTCCTTCTTCACTTTATCAAATTCATTCTGCAAAGCAGCAATTTTCTCCATG  
TTGTTGGCAACACTTGATAGACCATAGCCGTCACGGGTAGGGAAGTACATCATGTCAATT  
AAGCATGTCTCATGTGCTTCAACATACTCATCGAGAGATTCATCCTCATGGCCCATTGCG  
ACACGAAGAACATCAGATTCATTCTTAATTA ACTCATCAGCCTCTTTCAGTTCATTTTCT  
TCAAAGTCGTCAATTGAGGGCACAGGAGCAGATTTTGCTTTGGCACTGCGCTTGCTACCT  
TTCTTCTTCTCCTTGCGACTTTCTCATCCAAGGGATATTTTGTATTGTCATGCTCTAGC  
AAGGATAGTAGCTCCTTTCTTATTAATTCATCAGCTTGCTCAATTAATGTGCGAGGGACA  
AAGGAGCTCTTGTCTTCATCAGCTCTGATCAAAGAGTTTCTAATAAGGTCCAATGAAGCA  
GTAGGTGGTCTTGGTAGCTCCCTCTGCAGAACTTTTGATCTTTTCTTGAGTAATGCTTGT  
AGCCTTGCCTCTCCTCTGTTTTCTCTTAGCAGTTCTATCAGACATATCTTCTCAATT  
TTCTTCTTGTTCTTCTTCGTCTT CAGCAAAGGGCTGGATAACTATTTGGTATTCATT  
TTAGGCTGTGGAAGATTTTCAATCCAGAAAGCAGTTCTTTTTTTGAATCAGCTTGCCTT  
AATTTGTCGCTGTCAATGCACATCCATGTCTTCATTAATGTGCAGCTCATCCCTCATTGGA  
GTTCTTTTGGAGTCATACTGAGTGAATATGCATCACGTGAAGGGGTCGTCCCAATTCTA  
GGAGTAAGTCCTTGGCCTCCAGGAGTTGCTGAAGGCGTCAACAGAGGATTAGGTGTTGCA  
ATATCCTTTTTCTTAGGTGTA ACTCCAGAAAAATCTGAAGGGTGCAACATTGGATTATCT  
CCACCAAGCAAGGGAGTCTGAGATAGAGTCAGCCTGCGTTGATTTTCTGCTTCCATCATA  
ATGGCATCCTGCTTGCCGGCAGGAGTTCTCTGAGGGGTTCTCATCGGGGTCATACCCTGC  
CTTGGAGTCTGAGCATAGCTAGCAAGAAGAGCACGTGTTGCTGCATTCCCTTCTGTTAGC  
TCTTCAATTTCCAACAAGATCGCTAGCAATGCCATCTTGGCAATAGCATCCAGCTCATGG  
TCTGGAATCTGCGGAGCAGGGAGATTTAGTTTAGACCGTTTGCGA ACTGTTTCAGGATCA  
TTAAGTTTGTAGCTTGCATGATTGCTGCTGGAGTATCCTGCCTCTGAGCTATTTTATTT  
TTTGCAATATCCTGCTTTCTTAGGCGTGCTTCTCTATCTACTCTCCTTTCACCTTCAAGT  
TCTTCTATTGTGGTCGAAACTTGACTAATTCAGTAGGTCGGTCTTCTTCAGTAACATCA  
TAAAACCCTGGAGGCGGCCTCTTTTCAAAGGGGATTT CAGCATTATAATCAATTCCTCTT  
CTCTTTCTTCTCCTGTGCCGAACATCAATGCCAGCTGCTTTTAGTTCTCTACGTTTCTGC  
AATGAAGCAAGCCTCCGAGCCTCTTCAAGCTGTTTCTCTCTCGCTTTTCTTTTTGCTTTC  
TTTCTCTAGTATTAGCCAATCTTGCCCGTGCTT CAGAAAGCATTCTTTCTCATCTTCA  
TCCATATCCACAGGATCAGGACGTGCTGGCTTAGATTCTGGGTGGGGTCAATCTCTCCA  
GGACGCAATTTTCGTGGATCATCTCCAGGTT CATAGTTCTCATCTTTAGCACATGCTGCA  
TCTAGGAGTTTCTCATACCTCTCCAGGCATTGAGATGGAGTTCGCCCAACAATTGGGGCA



ATAGTTCTCCATTGAGTAGGCATAAGTTTTGCAAGATGCAATAATTTCTCATCTTCTTCT  
CGAGTCCACTCAGTCTTCTTAATGGAGGGGTCAAGCCACTCGTACCACCGCGCCTTGCAT  
TGCTTCGCAGATTTTCGAACCAAGAGCGAAGAAATTCTGGCCCACTGATTTTTCCCATAC  
TTCATAACCGCCGCTTCAAGATCTCGTCCTCCGTGTTCTTCCATACTCCACCCTTGATC  
ATAATCCTCATTTTGCCGGCAGAATTGATGAAGACGAGGAGCAGAGAATGGATTGAATTT  
GATTCGAAAAAGGGGTTCTTTTCAGGTTTCTCCGTTCCCAGTCGCAATGGCTATTGGCTAG  
GGCTGCTGCAGGTTTACCATGGTGGATAGGTGGGTCTTTCCGAATTACTACTACATGACT  
AGTACTACTGCGTTT

>RMYB63

CACCCGCAGTTTTCATTTTACCAATACTTCAACCAGCTTTTGCAAAATATGTAATGAATG  
CATGATGAAATGAATCAAGCATAATTTTAGCTATGGAATAACTTCCAGTACTCTAATACA  
TTAAAATCAACAAGGCGACAATACCATCAGTTACATGAGAAGTGCATCTGAGCACTAAAA  
TTATTGAAAACAAAGAACCACCAGAAACCAGAGACATTGACACGGACGGATCCATAAACA  
ACGACTTGACCATAACAGAAACCAGACCACAACGCAAATCTAAACAACCATGACAACCTG  
AATCCAGGCACAAATCTGGAACACAGAAAGCGCTTCACATTACACCTAATTTGAAAATGC  
TAAATAAGCATTATACTTCAACAATAACAGAAACAACATTTTTCACTCAGAAGTCCCAAC  
GCCATAAAGTCGAAGAAGTGGGCTCTTTGTGGCCGGCTCCTTGCTGGGGCTGAGCAAC  
CGGAAGACAGATCCCATGGGAAACAACAGAGTTGGCATCAGACATTATGGGATTTCCATG  
ACTAGTCATGTGACAGTAATAGATGTTCAACCGATTAGCGCCAATAGGACGAGAAAGTTT  
GTTCACTGTTCCACCCTTGCCATGGCCTGAACCAGAGCCACCAGATATTAAGGACTTGC  
TTGTGCATTTCATGGGTGTGCTAGTGTAGGGCGTGAATCCAGGGTAGTAATTTCTGTGGG  
CCCACCCTTGAGAGGGACATGAGAGTCAGAGCCGGAAGATGTGCCCATGGTTCTCTTGCG  
ACTTCGCATCAGCACATTGAATTTATTCTTCAATTGATTATCAGTTCGGCCACGGAAGTG  
TTTGACAATTAAGGACCATCTGTTACCAACTTCTTTTTGCAAAATGTAAGAGCCTTAGCTG  
CTCTTCTTCAGTAAAGGGTGCCTTACAGACATTGGGACTCAAATGATTAACCCAACGCAG  
GCGACAGCTTTTTGCTGTTCTTCTTCCTTCGATACGGTGCGCAATGAAATCCCAACCTCCAGC  
ACCAAACGCTTGGACAAATGTAGTAAGGAGCGCATCTTCTCGGCTGTCCAATGGCATT  
GCAGTAAGGCTTCATCCTTTTCTTCTCAGCATATGTTTTATTTCTGGAGGTCATCAC  
TCCAGAACTGACTACCACAAGATGCTCTGTGGCTTCAATGAAAATTTCCATCCAATATA  
TAGAGGACGGAGAAATAACTACATAATAATGTTTATATGTAATAAAATAAATTGCCTG  
ACAATGAGGCCTGATTACAAAAATCAGCATGAAAATTCATAAATTCACCCTCAAGTCAA  
ATATGAAACGGAAGAATAAAGCCCTCAATGTCCTTGAGAACTCTTCCATGTGTCTCCA  
TAATTTCAGAATAGATATACCTCACATTTACTCGAAAAACTCTAGACGTGAAGAATGAA  
TCCTTGGTTAAATTATTTTAAAAATAATTATTGCGAGGGTTTAATTAAGGTCATATCTAA  
TATACAATCTAGCGCAATTTCTTCAAATAACACTAGGAATCTAATTATTGTTAACTCGA  
AATAATGTTTAGGCGAGCACTGCTAATATTTCTTCAAATACAATTCAATCAAAGGAATA  
AGAGGGAAACCACCAGCCACTTTATGGGGCAGTCTAAAGGCGACTTGGGTGACATGAATA  
ATCATTTTTGGGTGTTGCAAGTGCAGGCAAATTTTGATGTGCACTTAAATCTTATTAATA  
TAAAAGTTTCATGTGAATGTATTTTTACATCCTAAGAAATTATTAACATAAACTACCACA  
GGCAACTTTTTAAGAATAACATTCATCCATACATGAACATACAAAAATTTAACAATTCA  
ATCATTATTCAGATTTAAATTCAAATTATAATTTATTTATACAAAAAACTTATACGTA  
AGACAATTCATAACAACCTGATATGATATATATATATATAAAAATATTTTTATGATGA  
AACTCCAAATTTGATTAGTCTCAT

>RMYB64

TGTGGTTTTGTCCTCATTAAAGTTTTGGTACTGATCATCCGCTAATTCTGTTGGCTGCGG  
CGGCAACTGGTCGGTGGTAGTAGGTGGCGGAAGAGGCTTGTGGGTGAGAGGGTTCGATTCC  
CATTTTCTTAGTTTCTTCTTGATGTGGGTGTTCCAGTGGTTCTTTATCTCGTTGTCTGT  
TCTTCCAGGCAGATGTGAAGCAATTTGGACCATCTGTTTCCAAGCTGGGCATGGAGATC  
AATGACCATTTTCTCCTCATACTGGGAAAGAAGCCCCCTTCAAGTCTGGTCTCAGGTA  
ATTTGTCCATCTCAATCTGCAGCTTTCCACACCTCAGAAGCCCTGCAAGTTTAGGGAC  
AGCCCTCCAGCAGCACTGGCTACCATTTGTGAGCATGAAGGCGATCAGCTTCTTGTCTTC

ATCACAAAGTCCATGGCCCTTTCTTCAGTCCCACCTTTGTCACAA

>RMYB65

CCTCTATGATCCCCATGAAATCCCCATCCTGCCCTTGTGCACCACTTTCATCGAACAGCC  
ATTTCTCCAGCAAACCTCAGGGGCATTACAGTCATCCCCAAATTCGACGAATCGAATCCCA  
CCTCACTGGGGCTCTGCAGATTATTATTGCAGCTCTCCGATGAGCCGGCGGCCTGGTGCA  
GTTTTGGGGAGTCATTGCTCTTCCAGTTTTCCAGTAGCCGGCGATGTTGTCCGCGTTTA  
CTGCATACATAGATGTCTGAATTGGCCTAGTTTGGGTCGTTGGACTTGGGTGCTGATCAA  
CAACGGCGGCAGAATCGGATTTATCGAAGGAGAGAGCCTCAGAGAGGGCCTGTTTGGCCG  
TCTGAATATCGGTTTGCAGCCTCCTCTCCCACTGACCTTTGGAAACGGCAACCTGTTTCG  
AACGGGAAGAATTATTATTTCCATCCACACAAACATGGCCTTGAGTTTGTGCTGTTGCT  
GCTTCCCTAGCTTCTTCTCAAGTGAGTATCCAATAGTTCTTGACGTCGTTGTCGGTCC  
TGTGGGGAAGATAGGAAGCTATTGCAGCCCATCGATTGCCTAGAAGGGCTTGGAGATGGA  
TGATCATCTTCTCCTCGTGTTTCGGAGAAGTTGCCACGCTTGATGCCCGGCCGGAGATAGT  
TGGTCCACCGGAGCCGGCAGCTCTTGCTGCATCTCGACAACCCTGTGTTGGAAGGAACAG  
ACCTCCAATTGCCAGGGCCATGTTTCGTGAATGTAAGAAACGAGGATGATATCTTCTTCAG  
GAGTCCATGGCCCTTCTTTCACACCAATTCTCCACAGCAAGGAGCTACTGGTCTGCCCA  
TTTTTCTTTCACTACTGCTACCTACTAGAAGTATATGTATATACACACTACTGTGACTAA  
AAACAAGATTAGTTGTGTCTTGTGTTAATTCCCTGTTTTTGGTGTTGTTGGCTTCCACT  
TATAATGGGTAGGGATTTATATACATGGGTTGTGAAACAAATTTCCAGAATTGGTTGCTGC  
TGTTTTTCTTTTGGGGATTTGTGCGAAGGATGGAATGAATGTGGGGTGCAACTCTGATTG  
GCTATCAGATC

>RMYB66

TCCCTATCTTCTTCTGCTGATTCAATTGGGATCTCCGCTTCAGCGTCGAATTTCCAATGAT  
TCTTAACCGCATTGTCCGTCCTCCCCGGCAGCAGCCGCGCGATCGTCGCCAGCGGTTGC  
CGTACTTGTTCGTGCGCCGCCAGGATGGCCTCGTCTCCGCCGCCGTGAAGGGGCGGTGCT  
CCACGGTGGGGCTGAGCTGGTTGCACCAGCGTAGCCTGCACGATTTCCCCGATCGGCCCT  
TTATGTATTTGCTAATGAGCGACCAATTCCGGGCCCCGTACTTCTCCACCAATCGCGTCA  
GGATGTTGTCTCCTCCGCGCTCCACGGCCCTTTATCCTCTCGGACTTCTCCCCGACA  
CCGTTCGATGAATCCGACGAGCACGACGAACTCCCCGACGAACATCGATTCAACATTTCCA  
TTCCCCAAATTTTCTTACAAGAAGTCAAGAACCCTTTTTTTCTTTCAGACAAAGGTATTG  
CAAGTGGGAT

>RMYB67

GTTCAATTAATCTTTCCGTTTTCTCAAGACAAGGGGTAAGAAAATAACTGCTTTCTTCA  
ATGGAGTTGTCGAAAATGCTTCGCCTTTTCTTGCTCTGCACCTCCTTCTTGTGACGCTCG  
TAGTACTTTTGGAGCATGGCTTGTACCTGGGCAGGGCTTCTTGTCTAACAGAATACCTG  
GAAATGCTCTTCCAATCCCCTTTCCCATATTTCTTTAATCCAGCCAGAAATGCCTTGTGT  
TCGTCGTCGGTCCAGGCTTTGGCCGCCTTCCGCTGGCCGGTGACCGGCTTCTTCTCGCTT  
TTAGGGTTCCGGCGATCGGCCTCCGACGACGATCGCAATTTCAATTTTATTACACCCG  
TATTTGGGCAAATCGACAAGGCCGGCGTCGATCGCCGCCACGTCTTCCAACAACACGGCG  
TAGTGGCGCTCGACCTCGGCCGGCGTCTTGGTCTGCATTTTCTCGGCGATCCTCACCCAC  
CGGTTGGGGTAACCGTCGGGGAACCTCGACCAACCCGTCCTCGAAATCCTTGTCTCCTC  
CACGTCCACGTCGACGGAGTGGCGTGGGCATCTCGATCGGCGGAATCCATTTTCCCCTGC  
GTTGTGATAATCGATTGGAAAACAAGAGAAGAAATGGAATTGATAATTTGATTGATGGG  
ATTTGGGGAATTAATGGGAAAATAAGCAGAGAAATGGTGCAATTACTGCAGAG

>RMYB68

AAACATGAACTCTCCGATTCATAAATTATGGCAGCAGAGACATCTCTGTTATCCAATCGC  
CTCAAAGCTTGAGGCAATCGGGCACCCGCCGCTCGCTCCTCCCCGAGTACGACTTCCGT  
TTCAGCGTCGAATTTCCAATGATTTTTTACGGCGTTATCCGTACGTCCGGTGAGCATCTTC  
GCAATCGTCGCCCACTTATTCCCCTGCACCCGCTGCGCCTGAACAATGATCTCATCTCC  
TCTCCGTGAACGGCCGGTGTCCACCTCCGGCGCCAGCTGATTGCACCACCGAAGCCTG  
CACGATTTCCCCGATCTCCCCGGAATCGACTGGCTTATCAGAGTCCAATTCCTCGCGCCG

TGCTGCTGCACAAGTTTCGTCAGCAATTCATCCTCCTCCGGACTCCATGGCCCCTTCACC  
CGCTCGGGAACCGCCTCCGGAGCCACCTTCTTGGCCATCGCCGCCATTGAAATACAGCAA  
CAATTTTGAAAAACCCTAATTATAACTGA

>RMYB69

GCAGTCAAGTGACAAATTAATCTTTCTCGAGGACATGGTTTTTTTTTTCCTCAGATAAGTTC  
TCCAGTAATTCTTGATCTCATTATCTGTTCTTCCTGGCAATCTTTGGGCAATCCTCGACC  
ATTTGTTACCCCATTTCTCATGAAGTTCAACTATAGTTCGCTCTTCTTCTGCAGTGATGT  
TACCATGCTTCAGATTGGGGCGGAGGTAGTTCATCCACCGCAGCCTGCAGCTCTTGCCAC  
CCCTCTTCAGACCTGATGCTTTTGCTAATGCATCCCATCTCCTCTCCCCCAAGACAGCTA  
CAGCATCAGCCAACCTGTTGGTCTTCTTCCAACCAGGGCCCTTACGCAATTCGGCTT  
CCTGCATGACAGAACATCTTGCAATTAGCACACTAGTGGAAATTTCCACCATGGGGATTGGC  
TTATGTGACTGATCTTGAAACTTCCACTATGCCATTAGATGAGTTTTGAAATTATTATAT  
ACAGTTGAAATTTCTTATGCTACAAATATATTGAATACATGTATGAGTTTTATCCTCATC  
TGGATTACAACATCAATACCTATCTAATCAGAGATAAAGGAAGAATTTGTACCTCAATGG  
ATAGCAAAGAAACCCAAAATCTTTCTTTAATCATCTATCGAATAGATTACTTGACCATTA  
TCTTGTTACTCTCTCAATGTTTATGCAGTCAAGTGACAAATTAATCTGGCAGACAATAGA  
TTTGAACCATGAGAAGGGGTAAAACATAGATGGAATAAAGTATAGCATTGCAATGCAACC  
GCAGTTTGATTCTACTCTTCAATGTACAGAGTTCACATTGCTACAGCACAATGTTTGAA  
AGGAAAACAGAACACATATGGATTATCAAAAACAGAATGTCGTCACAGTCTACATTCTAA  
GAGTAGGTCCCCCAATAGGATATGTGATAGTCAACTCCAGCAGGAAACAACAGACATCGC  
GCTGCTTCTCAAGAATACCTCTAACGGTCATCAATAAATGCTTTATTCATAAGTTCTAGC  
GCCGAATCCATGAACCTTCCAATTGCCTTGAGTTCACGGCCCACTGGTTCCATAAACTTC  
AGGTCAACTTCAATGGGCCATACCTTAAGACCGAGTAATTTGATAGGCGTAACTTGTCCA  
GGCACAATACAGTCAGGACCAGCAGCTTCGACCACAGCCTCTGTTCCCTAATCCACTCCCG  
ATTGGATCATCATGCTTGATAACCGAAAGGGCATAAGTGGAGTAAGGGGTCTGGGGTAGG  
CGAAGAACAGGGGAGTGATGAATTTTGGGAATAGGCTTTGCAGCAGACGATGCTCTCCAT  
GGAACATCTTGTGGCAGGGCAGCTCCTTTTTTCGACATTGTTGCAGTGCTCCTAGCACTT  
GTCGATGATAACTGCAGGATTGCGCCAAAATACACAAAATCACGGACTATATCCGTAA  
AAACACCAACTTCAGAATAAGGATTTGGTGAAGATAAGGATTTGTATTTCTTTTTCCCT  
AATGAAGGAAATGCCGAGCGCCGAGCGGGGAGGTAGGCAGGGCCGGACTTCGG

>RMYB3R-1

CTCTCTTCAAAAATCTCCCAATCAATAGAGAAATCATGCTCAGGAAACTTGTACCCCTGT  
TCACAAGGTAATCTGGTATCAAAAATGCGGGTCTTGAATACCGGACGATAATCTTCG  
GCGGAAAAGGGAATTAACCTTGTATCTTCAAGTGTCTGCATTCCCCCAGGAGTGCAATT  
GTGTTGTTTATAGACTGAGACATACTAGCAATGGCTGAACCTTGACTGCATTGAGAAGCT  
TCTTCAACTTCTACTCCACCTTCAAGAATATCATCTTCACTACCTTGTTTTCCCTTGAA  
GACGAAGAAGCTGTCAGGTGATTGGAATGACTGACAAGGGGAACATCTTGGAGCTGTTGA  
AGCACCCCTGAACTCATATACATGTCCAATTTCTTCTGACAGAACTATTCCAGTGATTT  
TTTATTGCATTGTCAGTTCTCCCGGGCAAATACTTGGTTAACTCTGCCCACTTGTTTCCA  
TGCATTTGATGAGCACGTATCAAAAATCACCTCTTCTTCTTGTGTCCAAGCATCTCTGTTT  
ATGTTGGGATTGAGATGGTTGTGCCACCTTTCCCGACATTGCTTTCCAATTCGTCCAGGA  
AGATTCTGCGCAATTGTAGACCATTTTTTGGGGCCATATTTCTCCACCAATTCAATTATC  
TTTTATCCTCCTCTTTGGACCATGGTCCTTTGACAAGATCTGGATTAAGAACCTTCTGC  
CACCTATGTAAGCACTGTACATCTGTTTCGATCCCTGAAACACTCCGCTATCTTTTTCCAG  
TTTTTCTTTGTAGC

>RMYB3R-2

CCATTTTAGCTTTTTCGCTGATATTGTGCTACACACAAAATAAATGAATAATTTCCCCAAA  
AGTGAGTGAAAATAAATTTAGGCAGCAATTTTTGCCAAGTATTCGAAACTTGAAATGGGA  
AAAAAGTTCCAATAATTTGGGAAGTATGTTAGAGGTTTAGGGTTTCTAAATGTGCACGAT  
AAAGATACCTTCCAGGTAGAAGCTTAGCTAATTCAGCCCATTATTCCCATGAACGCGAT  
GAGCATTAAGCAGAGTAAGCTCCTCTTCAAAGTCCAAGCATCCTTTTTAATATGTGGAT

TCAAATGATTATGCCATCTCTCACGGCATTGTTCCCTATTCGACCTGGCAATGACTTGG  
CTATAATAGACCATTTTGTAGGTCCATATTTAGCTACTAGTTCTGTGATCTTATCATCCT  
CCTCTTGAGTCCAGGGACCTTTAACAAGTTCTGGATTCAAACCTTTTGCCATCTATGCA  
AGCACTGCACTTCTGATCTATCCGAAAGAAGTCTCAGCTATTTTCTTCCAACACTTCCCTC  
TGAAAGCTGCAACTGCTTTTTTTAACGTAGCATCCTCCTCTGGGGTCCATCCTCCTTTTG  
CTCTTCTAATAGGGCCAGAAGTTCTCTTGTGAGCTGGAGAAGTACTAGAAGGGCTGCTTA  
TGCCGGTTGACTTTAGTGCTATGGTGCTACTATTCTCCGAAACAGAAGAGCTCGAATCAA  
CTGTGATATCCTTGTCTCGAGACAACGGTCATCAGATTTCAACCCTTCCATTAATTGCT  
TCAGATCATCAAACCTCCAAATTCCCAAACCTCCTACACTCACGAATTGAAGAACCAGCT  
CATCGATTCTTGAGCCCTAATAAAACCGCAAATTTGTGTGTGTGTGAGAGAAAGAGGGGA  
TTCCGAGTTGCGAGAAACTTTGCCGTTTCAT

>RMYB3R-3

TTTTTTTTTTAAACCCTCCATAATGCAGAGAAATTTTATTCCGTGATTAAGAGAAATGTA  
ATCCCTAGAAAAATCCTGTACAGTTAAGTTACAGCTTTAGTTAAAACACAATGGAGATG  
ATCTTTTTCTTGGGTAGAAAATTC AATGATACCGCCATATTCTTAAACAAAGTCAGGACA  
TGCTTGACATGAGGGCTTGGCTTCTCTTCTGAAAGGTTTTTCAGCGCTTTGGCTTCTCTG  
TCTTCAATTACATTTAGCAACTGAAGATTTTAAACCCCGTCTTTGACGAGTGTAGACAAA  
TTTTGTTACAGGACGGGCTTCTTGGACCTTAGAGTCTCCAGATTTTGTATTGTTGTTGCA  
GGCTTCTTGGTCCGTGATAGTTGTAATAAATCAAGCTGCTTCTCAACAGATTTATGAACTGA  
AGTCCTTTTGAAATTTAATCGATATGGTGGTGAAGAATTAGGTGACTTATTGCTGCTTAC  
TCCATCTTCATCATCTGAAACAGGATCAGCACATGAAGTCTTACTTTGCAACCCGGCATT  
CTCAGAGCCATTTGTGTGATTATGCTCACCACTGGGTACAACACTAGTTCCTTAGGTTGCAT  
ATCCAACCTTCTTCTTCTTAGAATGGAAGGAGTATTCCGAAAGCTTTTTGCGAGCAATTCT  
CAGTATAGATTCAGGGGACTGCGCAGAGAAGTTACCACCTCTTACACTAGGTGGAGTAAA  
CAAAGGTGTAGGTGGTGTGCGGGGCAAGTGTCTGACTGAGATTGCATCAAGGAAACATT  
TCTAAGGGTTGAATCCAGTTGTCCATAATTGTCAAATGTTTGAGGCTCATAACATAGTGT  
CCCATGTACGGGCATTTTATAACGCAACGATGCTTTAACAATGTTATATCGACCAACTCC  
ACCAAATGTGTGTTGTTTCTCAAACCTCAGATTTCTTGGTTGGATTAACAGCCCCTGATTC  
TGATTGCATTGCCTCATGATGCTTGGTGTCTCTGGATTGGTGGGCTCCATCTGTGGATG  
GCTAGCGACATTATAATCTTTGGACCTCTCCTCTGGCATATCAGTCTCCTATCATCAGC  
TTTACGCAAATCAGTAGTTTACACGAAGCTAAGTGTGCTGAATTTGACCCCTTATTGTA  
ACCAACATGTAGTTCTCCAGCTGAGGCAGTCTTATGGATGTCTGCAGCAGCATCATTTAG  
GGACACACATTTAGAAACAGGAGGAAGGTTCCCTGTAGCCAGATAAAAATCCAACCTTTTT  
CTTTAGAGAGCTATTCCAGTGATTCTTGATGGCATTATCAGTCTTCCAGGTAGAAGCTT  
AGCTAATTCAGCCATTTATTTCCCATGAACTCGATGAGCATTAAAGCAGGGTAAGCTCCTC  
TTCCAAAGTCCAAGCATCCTTTTTAATATGTGGATTCAAATGATTATGCCATCTCTCACG  
GCACTGTTTCCCTATTCGACCTGGCAATGACTTGGCTATAATAGACCATTTTGTAGGTCC  
ATATTTAGCCACTAGTTCTGTGATCTTCTCATCCTCCTCTTGAGTCCAGGGACCTTTAAC  
AAGTTCTGGATTCAAACCTTTTGCCATCTATGCAAGCACTGCACTTCTGATCTATCCGG  
AAAGAAGTCTCAGCTATTTTCTTCCAACACTTCCCTCTGAAAGCTGCAACTGCTTTTTTTAA  
CGTAGCATCCTCCTCCGGGGTCCATCCTCCTTTTGCTCTTCTAATAGGGCCAGAAGTTCT  
CTTGTGAGCTGGAGAAGTACTAGAAGGGCTGCTTATGCCGGTTGACTTTAGTGCTATGGT  
GCTACTATTCTCCGAAACAGAAGAGCTCGAATCAACTGTGATATCCTTGTCTCGAGAGA  
ACGGTCATCAGATTTCAACCCTTCCATTAATTGCTTCAGATCATCAGACCTCCAAATTCC  
CAAACCTCCTAAACTCAAAAATTACCAAATCCAATATATTAAGAAGTCAAACGCCCCA  
TGAAAATTCTAATTCTAATGACCAAAAAAATTTTCCAGCACTAATCCTATACCATGTGAGT  
CCAGATCTCAAAAAAAAATCGATAATTAACAAAAACAACCGCCTAATTCACAAAAGAATC  
TTAACACATAAATCGCCCCAAAAAATTAGAGAGGAAAATCTCAGACAATTTTTCGGTTAA  
TCACAGCTCGAAAAAAGACACAAAAAACATACTAAAACGATCAAATAACGAATTAATA  
AGACACAGTAGATAAAAAATTACAAAAGTTCGAAAGTTCAAGGATCTTGAACAAATTACC  
CACCAACT

**Part II. the protein sequences of RMYB gene family.**

>RMYB1

MEIYACNRWMHMPDSPAPPWNRQEDKIFEKALVEFPDGIDDRWQRIAGFLPGKSPDDVRA  
HYEALLHDITEIDSGRVELPSYSDGSTSIECERGSSSSGQISFGSPNAGSRSRDAERKKG  
TPWTEDEHRLFLIGLDYRGKGDWRSISRNVVTRTPTQVASHAQKYFLRHTSGKKERKRS  
SIHDITTAMDSLPMAPTNLPSHDGRGGFESCSFMPR

>RMYB2

CREKFENVYKYHKRTKDGRAAKSDGKTYRFFDQLEALENAPPPNPFTPPRPAATASLSTM  
PAHVTVSSISPTPLSVVPPQAAASIPIDSSPLIAQPPPQPPLMQHLRNSSVPPQGLNFQA  
SRPGLMSDSTSSSTSSDEDIQRRRGRKRKWKDCFHRLVRDVIQKQEELQKKFLDSLEKRE  
RERMAREEAWRVQEIARVNRHDLVQERSIAAAKDAAVIAFLQKVTDQHNLQIPPVAAA  
AEPPPPPPQPEPPPAPPAPTTQPAPAPITVPPPAKVFNNSKTDNNGGEVAGYSPAASSS  
RWPKAQVQALINLRSTMDLKYQDNGPKGPLWEEISSAMAKLGYNRSSKRCCKEKWENINKY  
FKKVKESNKKRPDDAKTCPYFHQLEAIYKERAKEVNNNNNPMVPIMAQPEQQWPINLHRQ  
QLPDSAMQDQDNRDNESDDHNINDEDDDDDDDEGLGFEILANKQHSSVANAAQES

>RMYB3

MESYNTPFENDQNVPLPASFPIHNICSSNPLSSNQDILHLDELALSSIIDRQSNPIDPFD  
PFLNKYMPYEGNGYSSAVMQHIQGEQNQITDMNMQNFKGDGFLSFPNEVDSLNGIEAALN  
YPDFMRLEYVNTDESSFVSADAFGLKGNSTDTRKSCNADNSDGGSNVSKPVKGLWTLLE  
DRLLVNLVKIYGAKRWTFMGQKLGRTGKQCRERWRNHLQPDIKRDDWTEEDKKLIEAH  
AELGNRWAEIAKRLHGRTEIKNHWNNTTKRRKLTGRCCKNKSPIPTSALQDYIMSLDSK  
KGSSSSNSNSNSNKSINSQA

>RMYB4

MGRPPCCDKLGVKKGPWTPEEDIMLVSYVQEHGPGNWRSVPPNTGLKRCCKSCLRWNTNY  
LRPGIKRGTFTDHEEKMIQLQALLGNKWAAIASYLPERTDNDIKNFWNTHLKKKLDRIQ  
PGSGNRPTENGSSKPIRSGQWERKLTQDIHTAKQALANALSVSTSESIDEDVMTNPNFAP  
NPIQTTSYASSTENIARLLKDWANKTPKCEEFSNYNYSSCSTEEVVAGGADLGEGLFGFE  
SFESYSSLSSDDFSRSGSPKPDPEGVLALEKWLLDDQGIQGLFDS

>RMYB5

MSITSEDERMAGSGVDSVDDANSGGTTTTGPNGLKKGWPWTS AEDAILIEYVNXHGE  
GNWNAVQKHSLARCGKSCRLRWANHLRPDLKKGAFTEPEERRIELHATLGNKWARMAA  
ELPGRTDNEIKNYWNTRIKRRQRQGLPLYP

>RMYB6

MGRAPCCSKVGLNRGAWSAMEDSLLTNFIQQHGEGQWRSLPNKAGLLRCGRSCRLRWMN  
LRPGIIRGNISEDEEDLILRLHRLGNRWSLIAGRLPGRTDNEIKNYWNTHLHKKGAAAI  
TLAIPPRELSKLESIEQKQNDKQKQKILDPGGHNDAL TARKEKENDTPNKTRVYFP  
KPIRVSELSTGSYNSLASGTSCGSDKAAEDVRREWPALLEIEDATFGVYNGDGEEAHF  
LDGGEALIPVLTHSEISDDVEMLEK VYDEYLQLL

>RMYB7

MGRSPCCEKAHTNKGAWTKEEDRLVAYIRAHGEGCWRSPLKAAGLLRCGKSCRLRWINY  
LRPDLKRGNFTEEEDEVIIKLHSLGKWSLIAGRLPGRTDNEIKNYWNTHIRKLLSRG  
IDPTTHRPMNEAAADRETLKTTTTTISFSGGCSRESEDQKIIVIRKDEDRRGATDQRCP  
DLNLELRISLPCQDADGFATPGGSDTDSANSCFACRLGIRNSKDCRCGGGGDGGGGRRGNS  
GYDFMGLKTGLLDYRSLEMK

>RMYB8

MCVCLPKSTIPSCPNSEAKEANLSPIKRQNYWKSPWPLHQILHKMGRAPCCDKANVKKGP  
WSPEEDAKMKDYIHKNGTGGN WITFPQKAGLKRCGKSCRLRWLNYPDIKHGDFSDDED  
RVICSLFARIGSRWSIIAAQLPGRTDNDIKNYWNTHLKKKLMGMVNTHQAAAAACPLLPC  
NNNNPQMPSSYECGYSNFYPCSQIRTLSTGVELEAMSPSFHPISNSSSNCNCNSLIYGGD

QPSCSSSEKSCFQGCNFGNFKGDGAEDHKLIISSSGCQVNYSVVEIKELISCNNGVGVND  
GSSFLMNGTNMMIK

>RMYB9

MASGKSIQLITYHEEIVDGEPIYVSSNSLPIKALNLEPAGHSFNAAALRLVGHCVEADTG  
DDDDGKGAPNEKEHVYVESSDSYGSKGKKKSGEAKQQDHYALLGLSHLRYLATEDQIRKS  
YREAALRHHPDKQAALLAEETETAKQAKKDEIEGHFKAIQEAYEVLIDPLKRRIYDSTD  
EFDDEIPYDCAPQDFKVFPAFVRNGRWSVTQPIPTLGDDKMPIKEVDSFYNFYWFYFKS  
WREFPHADEYDLEQAEGRDHRRWMERQNLKLEKARKDESARIRTLVDNAYKRDPRILRR  
KEEKAQKQRKKEAKLMAKRLQEEETARIAEEERKRKEEEEKRAAEALNQQKLEKEKK  
LLRKERTLRLTLSTPILSQRLDLTDDDVESLCSLDDKQSKLCEKLERKEGLERAELL  
KETLESNHKTKDKKEDENLQNGSTSIHMNGQVSNKAQKPAQAIASPLSTRE  
TSRRWEVISEYIGSGRSVEEILKATKTVLLQKPDQSAKAFDSFLEKRPQAIASPLSTRE  
DGLGLSNAGAAMGQSSVPGNLSDSNAVNGTALCSDQDSWSVAQEKGLVQALKTFPKETP  
QRWERVAAAVPGKTVSQCKKKVALMKESYRNTSSSTVEKTPSNSNSNSDSNSNSNSLSDLL  
ESSTQENPK

>RMYB10

MGRPSRDRKVGRLKGLWTREEDQKLLAYIQEHGHGSWRSLPAKAGLERIGKSCRLRWNTY  
LRPDIKRGKFSSEEKTIIRLHALLGNRWSAMAAYLPKRTDNEIKN

>RMYB11

MGRTPCCEKVGLKRGRWTAEEDEILTKYIEANGEGAWRSLPKNAGLLRCGKSCRLRWINY  
LRSDLKRGNFPTQEEAIVNLHASLGNRWLIAGYLPGRMDNEIKNYWNSHLRKHISYF  
RHFVPPPPPPKPNMHRKRRQSLSSLEHLKIHGIDNNMVKSPAAVIATNVNHDVDVDDDDP  
CKKRTTNPDLKEQVIASSSSKPISTHDDHRQQGNNDQTLQSGKLDDEKKTNTNTMTSAT  
CLIDEAVGTKIHFMDTTIKGSNGDLDENRGACNGNATENLVEHCCSTSSGYEYSSSSAP  
SSSINIEDDDFWNLRISPIPWNFNSPFEEIWDHGKLDGGLLHDQNMALPWLWD  
ASAFDDPEAHSVHD

>RMYB12

MMGHSIANDSDDGVLSADSPVSNDDGDFGGTSNGGIIKKGWTSWAEADILVEYVKKHGE  
GNWNAVQKHTGLLRGKSCRLRWANHLRPNLKKGAFTSEEERLIELHSRMGNKWARMAA  
HLPGRTDNEIKNYWNTQ

>RMYB13

MAAEPDATTEEVSDKIKGPWSEDEDILLRELVKKHGARNWSQISKSTGRSGKSCRLRWC  
NQLSPEVERRPFTPEEEEEIVRAHAELGNKWATIARMLNGRTDNAVKNYWNSNLKRKYEE  
ARSAARAGVGERPPQVLRQSEIGDVSLAMWSQSEPGDYVNFVPLIPVVKPTAAVNQAEA  
GAAANGNSEADRAVTALTLRLPGTGLSDSEKAYSSSNIPTEQRKSKDLPGRVSEVKEIT  
SGELRTYIQETVREEMEKYFRRPGG

>RMYB14

CRLRWINYLRPDLKRGTFQSQEEEDLIHELHSLVGNRWSQIAAQLPGRTDNEIKNLWNSSI  
KKKLRQKIDPNTHKPLQENINNSINDQLETSASAGNSKNNDKASEGSSCDLSFVDPDNN  
ISNSVHGVPVSGSGSALESPVPLQVERYHPLLENSTQELFLNRFVAAGCNHIAKPCVDL  
SGFLSFQNPNYGPNIGLSMNNPDISTTTIPHQFTAFNNLSPPIVPQINKPPVNFADNPS  
LPPFTVKFESSTELQSGYSTFESGAGFPWTPADSSGKPDNKTTHGEIGEDMIKWNEYLQA  
PFLMGNSIHNPTGQDHMYGETKAQQQFAADGSLSIGNWHTINPAPTFGQFS

>RMYB15

MKERQRWRPEEDTLRLAYVKQYGPRDWHLVSERMNQPLNRDAKSCLERWKNYLKPGIKKG  
SLTEEEQRLVIRLQAKHGKWKKIAAEVPGRTAKRLGKWWVEVFKEKQREQKENNKTIET  
IEEGKYDHILETFAEKLVRHIVPGITMPASNGGYLHGEQAAPSAPSVLPPWLASSSTTA  
TVRPPSPSVTSLSPLTVPPTPIPWLQPPDRLADSATHGMMNNIHSGLIAPMVGESTVV  
SELVECKEELEEGHRALASQKKEAAWRLKRVELQLESEKANRKREKMEDIEAKVKALREE  
EKATLERIETREYREQLAGLRREAEEAKEQKLAEQWAAKHIRLSKFLEQMGRSVAAAEPNG

R

>RMYB16

MGRSPCCDKIGLKKGPWTPEEDSKLLAYIEEHGHGHSWRALPAKAGKIFFSLFMCSFMSET  
PVWGGFFPGLQRCGKSCRLRWTNYLRPDIKRGKFSLQEEQTIIQLHALLGNRWSAIATHLP  
KRTDNEIKNYWNTHLKKRLAKMGIDPVTHKPKNDALLSCDGQSKNAANLSHMAQWESARL  
EAEARLARQSKLRSCSASPSFQDQCVEPAAGPTKPMGAPRCLDVLKS

>RMYB17

MGRSPCCDKIGLKKGPWTPEEDSKLLAYIEEHGHGHSWRALPAKAGLQRCGKSCRLRWTNY  
LRPDIKRGKFSLQEEQTIIQLHALLGNRWSAIATHLPKRTDNEIKNYWNTHLKKRLAKMG  
IDPVTHKPKNDALLSCDGQSKNAANLSHMAQWESARLEAEARLARQSKLRSCSASPSFQV  
QINDLNSIS

>RMYB18

MPFGSRYGDRHLEDDNFQPLGSRNDARYFRTNRENRSFSQKDWRSTSWEPAAATSSGPR  
FTTTEVNNQKSVENSETCHNNSKVNNGSPNPLPDSTSDQSLSHTKEQEKNNDGTADGGATSA  
QKSEKENGLDSVDWKPLKWARSGLSPRGPCFSLGSKTGSTGVDSIEVVAEAHQKSAMPV  
QSPCTSNVRSSVPASSDETCCRKKPRLGWGEGLAKYEKKKVEGPEdGVVKDGRVLSVCIT  
ENVHSPSVNLSDKSPRIASMSDCASPATPSSVAFSSSPGTEEKESMRPASVDQENNNLSG  
LPCIMSQKHCEGPTFNLESIDLASIAKLSNFLNELLOSEDPSAETDYVQTTSMKLLVW  
KVDVLKALEVTESKIDSLDELKSLIAEPGSCCPCPDTSSLLQGECLKPCMELVAASAS  
TVDPTFQVASTGSMNVENMPASVEESEALKSEEINSPGCATYQIVEPSSGEDVCASGTAE  
CEGFVNLDLKNSSNLNMLCLENGLSNEINSCQLDAKPISDSCQKGNVGNVHCGGDSNYD  
IIVASNKESAGRALEVLNKLPSRNYFFDLASIASIMPPFRSSSVKEKFLMRKRSLKFKE  
KVITLFRVFQHFWRREGRIISVRKLRGKSNKMLDMTHCGHKKNRSSRSRIPYFASNHRT  
VPAEEVIKFIHGLLSESSFKPCRNTLKM PALILDKDKMSRFISNNGLVEDPCAVEKERS  
IINPWTAEEKEIFIDKLAVFGKDFSKIASFLEHKTIADCIIFYKNQKSECFARARKKPE  
FSEQRKSQATTYLVATGKRWNREVNAASLNLVGEATRGNNGLLQRSNSQEIYSNETVAAD  
VLAGICGLSSEAMNSCITSSFDHADGYQDWKCPRVNSGSKRPLTPDCTQNVDDCESDES  
FEEMDSADWTDEEKSIQAVSSHGKDFDMIAQIVRTKSKEQCKIFFSKARKCLGLDQIH  
HGAGNAVFNNANGGSDVEDGCVVQAGSAVCNGDSECKMEEDLPPNNTKGKHEPDAVATH  
NLKPDVHSLAAEPVLETSSVGDTLDDKKAADSGAGAAGKKGKSEGACGSELEGPTVVVSS  
RTESELLVEEGSGSVAVGTKETDKEEVPDSDAGSFCENLGKGPLLSDDNFADAKKLEDRD  
LNSSEITAISGAISEVKSDLQLAGNVSPVGAFFSSMQVESGGQNLDFHADKSCIISSPEN  
GHMVSIESSMMFVPIKYQIHSNCNPLAYVGASRISEKHSLEAVGARDHQQLNSGYLLS  
EAVDSPQILRGYPVSGPSVNEINGDVNCKRHAVQHLPERDLSLHSNQHPDFSLQKCTRHL  
SEAAAFQTPFQSHGKSSYDNSRPPSNLDKPARNGDVKLFKVLISSQQKPNSCAQEACSD  
KVEHHKASCQSLSLRCDTHKSTFDSSVCGNKFIGSENISVRSYGFPDGNNTLMGFPSMP  
DSTLVLAKEYPAAFSSHSKPSGKLELPSLQGVRSSESPLNGVTAQSSIDLSSSNADYEVL  
KNQDLQFLTKEMKQQPQDIFSEMQRNGFDPVQEIQHEPRMIGIGIGRGGMVVGGQCSGV  
SDPVAAIKMHYAKAQNISVPASNEQREEDGSWKSNGDVGR

>RMYB19

MAHKIKEKQAGRKELNRGAWTANEDRKLVAIGTHGAKQWPTIAAKAGLNRCAKSCRLRW  
MNYLRPNIKRGNISDQEEDLIIRLHKLLGSRWSMIAARLPGRSDNEIKNYWNYHLSKKVL  
KQALGAPGISTGVKGCSSGKIGEEKKQNGNGDGNRNRNVSSNETEGSESLFDVN

>RMYB20

MADLGFHRSACKCREKFENVYKYHKRTKDGRAAKSDGKTYRFFDQLEALENAPPPNPFTP  
PRPAATASLPTMPAHVTVSSISPTPLSVVPPQAAASIPIDSSPLIAQPPPPPLMQHLRNS  
SVPTQGLNFQASRPGLMSDSTSSSTSSDEDIQRRRGRKRKWKDCFHRLVRDVIQKQEELQ  
KKFLDTLEKRERERMAREEAWRVQEIARVNREHDLVQERSIAATKDAAVIAFLQKVTDQ  
HNLQIPPVAAAEEERPPPPPPPPQPEPPPPASPAPTTQVPVAPITVPPPAKVFNNKTDNN  
GGEVAGYSPAASSSRWPKAEVQALINLRTSMDLKYQENGPKGPLWEEISSAMAKLGYNRS  
SKRCKEK WENINKYFKVKESNKKRPEDAKTCPYFHQLEAIYKERAKEINNNNPMVPIMA  
QPEQQWPINLHRQQLPDSAMQDQDNDRDNESDDHNNINDEDDDDDDDEGLGFEIANKQHS

SVANAAQES

>RMYB21

MDTSGSSSSCSRALVVKASFKNAYSGSSRTWGRDKAFENAVALCHNDADPWKQFPVAVPG  
KTIVDVKHHYKALRYDVEAIGSGKVPLPHYPSNIMVCEKKEIPLRIGGKQRIHWKDEEHG  
GSSWTEEDKAFDNALAFFRGDPLWVKVVLAVPGKSIEELKLHYEALIVESRKVPLPHH  
FSKNKAKKEKPLGIHEQKRFRWTEEEHRSFLRGGLEKFGKGDWKSISYCVPTKTNTQVAS  
HAQKYFTGLSTARRNQKRS

>RMYB22

VENTQTYSKVNNHKAMGTTQTLHENNSVGS AHPSESLSSPSQPRLKEKHEKVAAADTLTA  
LGQNSDKEDGLGSIDLKPLNCSRSGSVESRGEVNNQVIENTGTCSKVSNOKAVGNTQTWH  
ENNTVSSASPLPKSLSSPSQPCPEKHEKVGAADTLTSLTQNSDKENGLGSIDWKSILKWS  
RSGSLVSRGSGFSSSSSKSLGVDSTEIVADVQQKDVMRVQSPGAACAMPNAPDPSDETS  
SRKKPRLGWEGELAKYEMKKVDGREDGAAKDRLVSVTSTEAMQSPSVSLADKSPRFANL  
MECVSPATPASVGCSSSPGITSIDDKESIKAAAVDQNTANMSCSPDVTSIYHGGPAFIL  
ENLQLTSVANLSSLINEFQNSNDPSSAKTGYIRTTSMNKLLLCKLDILKALEVTESEIDS  
LETELKSLTAESDGCHPSEDHAAASGITVVPALLHIALSGNMNSGDTPGALKDQONLEQKD  
EEIDSPGTATSKLVEALSHGEDTCTSKTTEFAEGFVKLELDNASYLNELLLKNGLCDDDN  
VCPVDIPNSTMSNWQHLDGVDIQCDDHIYDSIIASNKESANRAVEELNKLLPDKKCFDI  
STVTSVSSSQRDFLKIKDRFLAKMLSVKFKEKIIALKFRVVFQHFVKEGRVVSARKLGGKS  
HKMFDLRTGYKRKCSFIRSRISYFAGSHQIVPAEEIVEFINGLLSISAIKPCRNFLRMP  
GFILKEKRMSRFISNGLVDDPCASEKERSIINPWMAEEREIFIDKLAIFGKSFSKIAAF  
LEHKTADCIEFYKHNKSECFERARKKPEFAKQSKSKASTYLVASRKRLNREANSVNLD  
MLGDASVIVAAVNDGLGTQQPKCTSRILFGAASSYKIPRGDDGPLQRSNSLDLDSNETA  
AADVLAGICGSLSSSEAMSSCITSSFDPRASSSIRWPLTPDVTQNVDEECSDDESCGEIETV  
DWTDEEKSIKSMSSYGKDFARISQCVGKTKEQCSIFFSKARKCLGLDRIHPGTGHVN  
AGGSDIEDGCAVQIGSVICSDSANKIEENLTLHEMKMDQASDTAESHKLPDASDYGEG  
SRACPLDSMAAGAVLRNSSVSNLVDKKSALDLNSGSKEEIGADGSELVVRTMFVSNNS  
PQVELGFDCGLPDGLSKAYNKASVKVSGGHVQGDNQEGHNLPEENMNSKKVECRDANLV  
DMAFSSAVNELK

>RMYB23

WDKVSRLGELGYNRS AKKCKEKFENIYKYHKRTKDGRSSRQNGKAYRFFEQLELLDAQF  
SVPSTPSNPLPSYTRPASDPAAAEAAMAKQGGCSQDFPIPCSNYPIAEFTSASTSTASSS  
GRDSEGSIKKRRKLV DYLERLMKDVLVKQEDLQNKFLEALEKCEKERMAREEAWKAQEMA  
RIKREQEYLAQERAIAAEKDAAVLAFLQKITQQALPLQMPEVLASLFDKRSENQESVAEK  
RAFVQDNGIGEASAHNEKQDNSAGENVVQNSSSRWPKAEVEALIMLKTDLDMQYQDSGPK  
GPLWEEISARMKKIGYDRSAKRCKEKWENINKYYKRVKDSNRKRPDDSKTCPYFNMLESL  
YAKRAKSDHNSENGTSLLKPEQILMQMMGQEQQHQPEQTIGEYGDNDHQNGEGMDDE  
EDRESGDGYQVVANNLSSVTTLG

>RMYB24

MAAAEASGGLDRIKGPWSQEEDELLRKLVERHGGRNWTLVSR SIPGRSGKSCRLRWCNQL  
SPEVEHRPFTA EEDERILQAHRNFGNKWAKIARLLNGRTDNAVKNHWN SKLKRKAAAAA  
SGGDERSAKVWRAENG DVSAALRVSPESMNLNSETNDSSEDNVNFYFPVARSSPGVES  
PQYGAENEDNSNIELTLLTSLPGSVSSSAKEISEKDSPSSDTPPRGGNGAFPPGPA  
FDPKLLQIQEMIRSEVRNYFSREMNGGDGILSGKRIAISDFNE

>RMYB25

MKKGNKSGGANS GDFPKRKEWHIVSWSQEEDDILREQIRLHG IENWAVIASKFKDKTAR  
QRRRWFTYLN SDFKKGGSPEEDMLLCEAQKIFGNRWTEIAKV VSGRTDNAVKNRFATL  
CKRKAKHEALAKENFTSYINLNNKR VIFPNGLNSGGYKSGAPLKKMRNDVTVAVESQEG  
RPSSECDAVDHLLRHPFQVLAQNAHSSAVSIPSELHSNQIKEALMDGLEDCKIEGTFLRK  
DDPKVLALMQQAELLSSLAIKVNSEKTNQSLES AWIAIQEFLKQNRNNLPAFENPDHDF  
HLEKLRELVEDLRSSNEGSRLSWREP DVYASSPASSEYSTGSTLLPNIPADKMEEHKTDI



SVLHQELGNEFVEESRICNTTASTNEVNMLTCGHIEENCEEVC DYSNTEFGSPVHV TPLF  
RTLAAAIPSPKFSESVRILSF

>RMYB26

MSMPSGSNKRMVSSEVLPPSRDNASSGGGATTGEANILLKKG PW TSAEDAILIDYVTRHG  
EGNWN AVQKHSGLARCGKSCRLRWVNHLPDLRKG SFTQEEERKVIELHSRLGNKWARMA  
AELPGR TDNEIKNFWNTRTKRLERSGLPPYPPDVRLRMAKENQLNNS SKNTFLFNTVPQQ  
GFNFASNPEIPNFKALELNSPIYSTHPAPMPNILPGSLLDISARSLVAQGRNLNSSNINK  
PHQSTVYPSKRLRPSEPPLQGFNTATGNALASGSPFDDPLQIGQPLVFSSGHDCYPTCNR  
IMSSSLLDGSVNHAVLYGNPASEPAQATKLELPSLQTQTGHWVLP PPP

>RMYB27

MRSPSSSSSKKTSSANGDGCSSGKQAAVTPYCSNVGLKRG PWTAEEDELLAQYIKREGEG  
RWRTL PKKAGLLRCGKSCRLRWMNYLRPSV KRGHITPDEEDLILRLHRL LGNRWSLIAGR  
IPGR TDNEIKNYWNTHLCKKLIRQGLDPKTHKPFNPNKSSVNVNRDSSSEALEHKSSVSS  
PIPNNSTTFNPFENVITNSDQLEGGHNM DYPISENDEELRNCNKR IIIRGDEDED DDDDDLL  
NCCIDDSFLNSLINDDIFNEEQQ

>RMYB28

MPSASELSSSVWSREQDKQFEKAIATYPEDTLDRWEKIAADVPGKSV EEVKQH YEVLVDD  
VQRIESGFVEVPCYNSASDGSTSHAGDGTPSRKGANS GQSNHGGKSSKSDQERRKG  
IAWTEDEHRLFLLGLDKYGKGDWRSISRNYV VTRTPTQVASHAQKYFIRLNSMNKDRRRS  
SIHDITSVASGDISLPQG PITGQANGSSAGGPSGKSSKPLPQAPVATAGVSMYMPPTIG  
QPIGGPLVSAVGTPVNLSPMHMAYGVGAPVHGSV VPGVGLSMPPMTYPGPHPSAHR

>RMYB29

LLLVFINSAGKMRIMIKGGVWKNTEDEILKAAVMKYGKNQWARISSLLVRKSAKQCKARW  
YEWLDPSIKKTEWTR EDEKLLHLAKLMPTQWRTIAPIVGRTPSQCLERYEKLLDAA

>RMYB30

MKKKVNNSTKASNSGVPKQKERHIVSWSQEEDDILREQIRVHG IENWAIASNFNDKTR  
QCRRRWFTYLN SDFKKGGSPEEDMLLCEAQKIFGNRWTEIAKV VSGRTDNAVKNRFTTL  
CKRRAKHEALAEENNTASYINSNKR VIFSGGSETAVPVKKIRTYISNTAAENQEEKVAG  
ECDATDDLHRHPFATVRQIARVHEFD FPAQMNVNHIK GASTDGSEEKNKSAGTFLKDDP  
KVIALMQQAELLSSLAIKVNSQKTDQSLESAWMVLQNFQKQNKESDLIMFTHPIDLQFE  
NCNELVEDLRSSNEGSESSWREPHMCESSPGSSDYSTSSTLLSSVPGDKIEACQSEISVL  
HWETGKELQSNPVDDQCCLSVESMCHTATANEVNMVSGNDTKENNEAACGYSNTEFSSP  
LHV TPLFRALAAAIPSPKFSESEKHFLMKTLGMESAAPSTMTNPSQPPPCRSLHLCL

>RMYB31

RYGPHNWN AIAEKLQGRSGKSCRLRWFNQLDPRINRSPFSEEEEEERLLACHRIHGNRWAV  
IARFFPGR TDNAVKNHWHVIMARKCRERSKFYAKRTL SHHYHRRHQKNQPIIGRSGINAH  
EKEALSLTLSSSSSSSKCDNNSRVLAAPT NCTSTARKDLGINNNYTTLGLGHTFLDGFAH  
QQISNPLSMYNLPSALMLPLWDRQHVKIAQENG SREVEFYNFLQVNTDSSNRSEVINNH  
KHAKRNIEEEEHQEEEEVDQKGSIGETKNTAAAGGVVALPFIDFLSVGRAGN

>RMYB32

MPADESSSVWSREQDKKFEKAVATYPEDSSDRWEKIAAQVPGKSVEDIKYHYQLLVDDV  
NQIESGFIQVPCYNSSSDGSTSHADDEGAGK KSGNSGLLNDSNHGGKSSRSEQERRKGI  
AWTEDEHRLFLLGLEKYGKGDWRSISRNFV VTRTPTQVASHAQKYFIRLNSMNKDRRRSS  
IHDITSVNNGDVSV PQGPITGQTNSMAVGGGSPKSNKQSLQVPVGVNMYGTPTIGQPIG  
GPLVSALGTPVSLPPPHLATYGVGAPV VPGAPTTYMPHTSAHR

>RMYB33

TGLSRC SKSCRLRW TNYL RPGIKRGNFSEHEEKMIHLQALLGNRWAAIASYLP HRTDND  
VKNYWNTHLRK KLGKQQQPQGHVYVDGNNSSRSKPVSVTKGQWERRLQTDIQTAKQAL  
SEALSLDKSDSAAVVDQHPSPTTQTRPIQTSMYAVNADNIARLLENWKSNDSPKLHQGA

>RMYB34

MSMPSGSNKRMVNSGVLP SRDIASSGGVATTGEANILLKKG PW TSAEDAILIDYVTRHG

EGNWNNAVQKHSGLARCGKSCRLRWVNHLRPDLKKGSTQEERKVIELHSRLGNKWARM  
AVLPGRTDNEIKNFWNTRTKRLERSGLPPYPPDVRLRMAKENQLNSSSKNTFLFNTVAQQ  
GFNFACNPEIPNFKALELNSPIYSTHPAPMPNIHPGSLDISARSLVAQGRNLNSSNINK  
PHQSTVYPSKRLRPS

>RMYB35

GPPNPNPMADKNRHHLPHDHDGNGDDDDDDDDGALPRKRSSPSSSSSLNRGAWTPE  
EDATLAKFIEIHGPRRWKSVAMKSGLNRCGKSCRLRWLNYPDIKRGNISEAEDDLILR  
LHRLLGNRWSLIARRLPGRTDNEIKNYWNAHLRKKAKLMEKLPSTSTVALIKKWEDEDNDD  
DDDDDDDDQEREKASSSMEIASGSEMVTKRMSVGDGMGSSDVEGDELDFSRQGTGLEW  
VKSFLLEEDA

>RMYB36

MGRTPCCAKNGLKKGWPTQEEDQKLIDYIQKHGYGNWRTLKNAAGLQRCGKSCRLRW  
LNPDIKRGFRSFEETIQLHSILGNKWSAIAARLPGRTDNEIKNYWNTHIRKRLRMG  
IDP

>RMYB37

MGRPPCCDKIGVKKGPWTPPEEDIVLVSYIQEHGPGNWRAVPANTGLLRCSKSCRLRW  
LNPDIKRGFRSFEETIQLHSILGNKWSAIAARLPGRTDNEIKNYWNTHIRKRLRMG  
IDP

>RMYB38

MDMEKDELKRGWTEQEDAQLVLYVNLFGDRRWDFIAKVSGLRRSGKSCRLRWVNYLHPG  
LRRGKMTPEERLVLQLHAKWGNRWSKIAQKLPGRTDNEIKNYWKTHMRKKAQEEK

>RMYB39

MKERQRWRPEEDTLLRAYVKQYGPRDWHLVSEMNQPLNRDAKSCLERWKNYLKPGIKKG  
SLTEEEQRLVIRLQAKHGNKWKKIAAEVPGRTAKRLGKWWVEVFEKQQREKQENNTIEP  
IEEGKYDHILETFAEKLVRHIVPGITMPASNGGYLHGEQTAPSAPSVLPPWLASSSTA  
TVRPPSPSVTSLSPPTPPIPWLQPPDLADSATHGMMNNIHLGITPMVGESTVA  
SELVECKEEEGHRALAAQKKEAAWRLKRVELQLESEKANRRREKMEDIEAKVKALREE  
EKATLERIETERYEQLASLRREAEAKEQKLAEQWAAKHIRTKEFLEQMGRSVAAAEPNG  
R

>RMYB40

MKERQRWRPEEDTLLRAYVKQYGPRDWHVSEMNQPLNRDAKSCLERWKNYLKPGIKKG  
SLTEEEQRLVIRLQAKHGNKWKKIAAEVPGRTAKRLGKWWVEVFEKQQREKQENNTIEP  
IEEGKYDHILETFAEEL

>RMYB41

MSNMERIKGPWSPEEDQLLQKLVEKHGPRNWSLICKSIPGRSGKSCRLRWCNQLSPQVEH  
RAFTPEEDETIIIRAHAKFGNKWATIARLLSGRTDNAIKNHWNSTLKRKCVSMSEEDLNAA  
FDPDAQPPLKRSASVGPTEVFCFNPSPSSGSDVSGVSHSGHLVFRPIARAGGFSPD  
LQLPDPVTSLSLSPGSDLNPNPNTNTVTEQLNQSPFRPNPNNAVDPAVAVGMTSPAMM  
QFDSA VSNQFFSPDFLAVMMEMVRKEVRNYMEGIEQNGFGVQNDAIRNDVVK

>RMYB42

MAAKAKKVAPEAVPERVKGPWSPEEDELTKLVQQHGARNWTLISQSIPGRSGKSCRLRW  
CNQLAPEVEHRPFTEEEDEIIVQAHAVHGNKWATIAKMLTGRTDNAVKNHWNSTLKRKSY  
SGRSDGGSARLPQALRRLDNRDVSAAIIESESSCLMDSRSDSDHKKNIPADPPTPPVK  
DNVDLTELSSLPGFARNAPLEINLSNIPNFEQGRASKTSLFPELATMVQQIREEVR  
NYMSQHSLKMHSAL

>RMYB43

GLNIGGGDGGAGRWRQETLTLLEIRSRLDHFKEANQKGPLWDEVSRIMSEEHGYQSRG  
KKCREKFENLYKYKTKKEGKAGRQDGKHFRFRQLEALYGDSNGAASASDQANLVGGNF  
HYNYGKSTSLGANQESLQGLSNTSLSNYSDEVSSSSDDTDLNEGNDKADDPNK  
KRGKRGWKVIRDFIDLQMKKMDKQEVWMEKMMKTMEQKEHERMVREEEWRRQDIVRME  
KEQKFWASERAWIEARDAALMEALHKLTKGDNHLLGAENQIQNNNEDIGSETMTNSAKGG

DMIWPESEISRLIQLRSGMEAKFQQRGVSSEEVLWEEIATKMACYGHDRGTGVLCKDKWDS  
VNNYLLKCNKKRKENSKGCTTAYYHEQVSNQGGHHVYSCNDASHEQQHQQQHAAVNS  
SPNSNTGNPMTTDS

>RMYB44

MGRSPCCEKAHTNKGAWTKEEDQRLINIRAHGEGCWRSPLKAAGLLRCGKSCRLRWINY  
LRPDLKRGNFTEEEDEIIIKLSLLGNKWSLIAGRLPGRTDNEIKNYWNTHIKRKLISRG  
IDPQTHRPFNSTAPAASTGGAPALPAKACLDLFRSTPPQAATSMNEATNNIRSSPAIDNS  
SSGDNTKCSSTTTEESQPPPVKMEVENDPYAVDLELSLGLPSPSKTKYAKSGSFNSSSS  
VESKPFSEFLRGAGKPSTAAEPMCFRWPLSFQGSVI

>RMYB45

ISTVLIINSHSDYCYCLFHGFYKTPFFTPFLCLIIFRNFA TRVFPYSPILNWAEQNLR  
TSVSPLKGLILDEMETLTCQTSLSASDSNWFHQQGMMTTVWTKEENKQFESALAFDEKTPN  
RWFKVAAMIPGKSVYDVINQYREL VADVSDIEAGLPIPAYLASSFTYELADLRSFDVCR  
KRVRTCDQERKKGVPWTEDEHRRFLLGLQKHGKGDWRNISRNFVISKTPQTQVASHAQKYY  
LRQLSGAKDKRRPSIHDITTIHLTNTSSSENKPLLEKPSVQHTSVQKPTYAPKVFVDR  
SHINDKTLMDLDSAAGDLLVAYPCNVAAQTWHNVKTGASHPHFRI

>RMYB46

MPSDESSSSVWSREQDKQFEKAIATYPEDGLDRWEKIAADVPGKSVVEVKHHYELLVDDV  
NRIESGVVEVPCYSSSSDGSTSNGGDEASGKSSNSGRLNGDSSHGGKSSKSDQERRKGI  
AWTEDEHRLFLGLDKYGKGDWRSISRNYVVTRTPTQVASHAQKYFIRLNSINKDRRRSS  
IHDITSVNNGDVSVPQTPITGQTNAAAGGPPMKS NKPLPQTAVGTPGIGMYGPPTIGQP  
IGGPLVSAVGTPVNLPPHLAYSVGAIPGPPVPGTPLTMAPITYPVPHK

>RMYB47

MADKNRHHLPHDHDGNGDDDDNDDDDDGDGALS RKRSSPSSSSSLNKGAWTPPEEDATLA  
KFIEIHGPRRWKSVAMKSGLNRCGKSCRLRWLN YLRPDIKRGNISEAEDDLILRLHRLLG  
NRWSLIARRLPGRTDNEIKNYWNAHLRKKARLMEKLPS

>RMYB48

KGPFWEVSRKMASLGFQRSSKCKEKFENVYKYHKRTKDGRAAKSDGKSYRFFEQLEAL  
ENSPAPPRSAAPAAPAPPNLQMP SHVTVSSISPTPLSVIHPITNPQLNSPQFQQSQPPQ  
FIHQHTIAATNSQITPQARIFRSESTSSSSTSSDEDIQRRRGKRRKWKDYFERLMKEV  
VEKQEALQIKFLETLENREKDR TAREEA WRVQETARMNREHEILVRERSMAAAKDAALIA  
FLQKVTDQNNPQIPVTPAPAKPPPPPPQPPQQSNPPTTKAVETSKTDNGGGGESVLP  
SSSRWPKAEIQALIDIRTSDFKYQDNAPKGPLWEEVSAAMAKLGYNRNAKRCKEKWENI  
NKYYKKVKESNKKRPEDSKTCPYFYQLEAIYKERAKHGIVSSMNPSPYNNPNMEPILVRP  
EQQWPLPNNNQQQQQK DSTFRDQNHNESENEHEEDEFDEEEDEMDENGGEYELIAN  
KQSSTMG

>RMYB49

MNREIGQVSPASYFTNSNWLFE GSTVAKWTPEENKRFENALALFDKDT PDRWQNVASMI  
GKTVNDVMKQYRELVEDVSDIEAGLPIPGYSNNSFTLEWVTNHGYDGLKQIYCPGGKRG  
SSTRCS DHERKKGV PWTEEEHRQFLGLKKGKGDWRNISRNFVTRTPTQVASHAQKYF  
IRQLSGGKDKRRSSIHDITTVNLDET NKSPEPKDASHSPQKSNMILQSHPNLGGNVVV  
RATYDSNL TNPGAMMGFTPQDGGLMITGLQGTSSFGVNLNEHMQGFDQRGLWLGHPGTI  
FQMHPTRHS

>RMYB50

GKSCRLRWINYLRPDLKRGNFTEEEDEVIIKLSLLGNKWSLIAGRLPGRTDNEIKNYWN  
THIRKLLSRGIDPTTHRPMNEAAADRETLKTTTTTISFSGGCSRESEDQKIIVIRKDE

>RMYB51

MVRAPCCEKMGLKKG PWSPEEDQILV TYIQQHGHGNWRALPKQAGLLRCGKSCRLRW  
LRPDIKRGNFTEEEETIFTLHQLLGNRWSAIAARVPGRTDNEIKNIWHTLKKKLENN  
NINPSP

>RMYB52

MASGKSIQLITYHEEIVDVGKPIYVSSNSLPVKALKLEPAGHSFNAAALRLVGHCVEADTC  
GDDDGK GAPNEKEHVYVSSSDSYGNKGKKKSGEAKQQDHYALLGLSHLRYLATEDQIRKS  
YREAALRHHPDKQAALLLAEETETAKQAKKDEIEGHFKAIQEAYEVLIDPLKRRYDSTD  
EFDDEIPDCAPQDFFKVFGPAFVRNGRWSVTQPIPTLGDDKTPIKEVDSFYNFWYSFKS  
WREFPHADEYDLEQAEGRDHRRWMERQNLKLESEKARKDESARIRTLVDNAYKRDPRILRR  
KEEKAEEKQRKKEAKLMAKRLQEEETARIAEEERKRKEEEEKRAAEALNQKLEKEKK  
LLRKERTRLRTLSTPILSQRLDLTDDDVESLCSLDDKQSLKCEKLERKEGLERAELL  
KETLESNHKTKDKKEDKENVLQNGSTSIHMNGQVSNKAEKPWGKEEIELLRKGMQKYPKG  
TSRRWEVISEYIGSGRSVEEILKATKTVLLQKPDSAKAFDSFLEKRPQAQAIASPLSTRE  
DGLGLSNTGAAMGQSSVPGNLSNSSNAVNGTALCSDQDSWSVAQEKGLVQALKTFPKETP  
QRWERVAAAVPGKTVSQCKKKVGLMKESYRNTSSSTAETPSNSNSNSNSNSNSNSLSDPLES  
STQNE

>RMYB53

MASGKSIQLITYHEEIVDGEPIYVSSNSLPKALNLEPAGHSFNAAALRLVGHCVEADTG  
DDDDGK GAPNEKEHVYVSSSDSYGSKGKKKSGEAKQQDHYALLGLSHLRYLATEDQIRKS  
YREAALRHHPDKQAALLLAEETETAKQAKKDEIEGHFKAIQEAYEVLIDPLKRRYDSTD  
EFDDEIPYDCAPQDFFKVFGPAFVRNGRWSVTQPIPTLGDEKTPIKEVDSFYNFWYSFKS  
WREFPHADEYDLEQAEGRDHRRWMERQNLKLESEKARKDESARIRTLVDNAYKRDPRILRR  
KEEKAEEKQRKKEAKLMAKRLQEEATARMAEEERKRKEEEEKRAAEALNQKLEKEKK  
LLRKERTRLRTLSTPILSQHLLNLTDDDVESLCSLDDKQSLKCEKLERKEGLERAELL  
KETLESNHKTKDKKEDKENVQNGSTGIHMNGQVSNKAEKPWGKEEIELLRKGMQKYPKG  
TSRRWEVISEYIGSGRSVEEILKATKTVLLQKPDSAKAFDSFLEKRPQAQAIASPLSTRE  
DGLGLSNTGAAMGQSSVPGNLSNSSNAVNGTALCSDQDSWSVAQEKGLVQALKTFPKETP  
QRWERVAAAVPGKTVSQCKKKVALMKESYRNTSSSTVEKTPSNSNSNSNSNSNSNSLSD  
LLESSTQNEPK

>RMYB54

MDTSGSSSSCSRALVEASFKNACSGSSQTWGRDKAFENAVALCHNDADPWKNFTVVPVPG  
KTIEDVKHHYKALRYDVEAIGSGKVPLPHYPSNIMVCEKKGMPLRIGGKQGIHWKDEEHG  
GWNWTEEEDEAFDNALAFFHGDPLWVKVLLAVPGKSIEELKLHVEALIVKSRKVPLPHH  
FSKNKAKKEKPLGIHKQKRFRWTEEEHRSFLCGLEMFQKGDWKSISYCVPTKTNTQVAS  
HAQKYFTGLSTARRNQKQSNIKDTPTAHLGSMPSFPTGIMPGNPISAGKHPLSPKPLGIT  
PDTPFSTQLISKQGISAKGRPTYLDPFWQDDAILHPGSFHFTT

>RMYB55

MRKSSGKKKEESSGGGRGGGGREAWTKEEDQMLIDYIKLHGEGCWTSPLNAAGLQRSGK  
SCRLRWVNYLRPDIKRGNFHGHDEDDLIKLHALLGNRWSLIARRLPGRDTDNEIKNYWNSH  
LKRELIAMGIDPNNHRIHQTMFATTRPAAACSNVDTANPSSDNKMLSSSKTCLKAVSETS  
TTSSLPPPQVNLDSLIAFAAPSGKEAAAGRGRSNEP

>RMYB56

MASLGFQRSSKCKEKFENVYKYHKRTKDGRAAKSDGKSYRFFEQLDALENYPAPRSAA  
PAAPAPPPNLQMPSHVTVSSISPTPLSVIHPITNPQLNSPQFQQSQPPQFIHQHTIAAT  
NSQITPQARIFRSESTTSSSSTSSDEDIQRRRGKKRKWKDYFERLMKEVVEKQEALQIKF  
LETLENREKDRTAREEAWRVQETARMNREHEILVRDRSMAAAKDAALIAFLQKVTQNNP  
QIPPVTPAPAKPPPPPPPPQPPQSNPPTTKAVETSKTDNGGGGDSVLPGSSSRWPKAEIQ  
ALIDIRTSDFKYQDNAPKGPLWEEVSAAMAKLGYNRNAKRCCEKVENINKYYKVKESN  
KKRPEDSKTCPYFYQLEAIYKERAKHGIVSSMNPSYPNNPNMGPILVRPEQQWPLPNNNQ  
QQQQQKDSFRDQNHNESENEHEEDEFDEEEDEMDENGGEYELIANKQSSTMG

>RMYB57

MGHQSCCVKQKLRKGLWSPEEDEKLFNHITRHGVGCWSSVPKLAGLQRCGKSCRLRWINY  
LRPDLKRGMFSSQEEEDLILSLHESLGNRWAQIATRLPGRDTDNEIKNYWNSLKKKLMNEG  
IDPNTH

>RMYB58

MAELGFQRNAKKCKEKFENVYKYHKRTKDGRSSKSDGKTYRFFDQLKALENTPPPPPPPP  
ASMAAPPLPTLLPKSTVPSSISPNPVSMAPPSALQPPPPPLAPVNISNPADTHALRRPPP  
PPNLFNTMTSSSSTSSDEDIQQRRSGSGRKRKWKVFFQRLMKDVIQKQEELQKMCIEL  
EKREDRRTARDEAWRMQERARLNREHELLVQERSMAAAKDAAVIAFLQKVTDQQNLQIPI  
SLPITQKIPQPPAPPPIKSFDKIGDNSMPGSSSRWPKAEIEALIKLRTNLDLKYQETG  
PKGPLWEEISAAMAKLGYNRSSKRCCKEKENINKYFKKVKESSKKRSEDSKTCPYFHQLD  
AIYKVRGKSDTKPENPPMMTRPEQQWPLPAVQPPPPQDDAAMDLDLDRDDDDDDDDDDGDD  
DEEDQGYEMVGDKQPAERG

>RMYB59

MFDGIGIMCSDHHDYLSQFINASRTSSLLDDHIHCNCFDPSLISSSLDNSITQGERSV  
VPWSNEEVVELFKFRSSMESCTSLPELISWGHVSRRLAEIGFKRSAVECREKFEGKNFNN  
VISCKDSRVCNELDESYLHDHPEEIQVSAECGPAETKDVVVDQERADKDVAKVSENN  
EAAKKASQQLTREGKSKRKRKEGEV GALRGYFEAIVDKVMARQEELHNELIASIIKRDEE  
RMAREEEWKIQEIKRKTAMQMRAKDQANAEEERQATIIQFLKIFQDQHINANKVIQTGSS  
PSRLLIPSLKTNPISSRWPREEVLALINMRCKVSYNSKEGQMKGPLWERISQGMELGYK  
RSAKRCKEKENINKYFRKTKDR

>RMYB60

MAAAITSGGGGGSGEFCKKMDLDRIKGPWSPEEDELLOQLVQKHGPRNWSLISKSIPGR  
SGKSCRLRWCNQLSPQVEHRAFTPEEDETIMRAHAKFGNKWATIARLLSGRTDNAIKNH  
NSTLKRKCSSFSSDEAFFDSADQPPDRPLKRSVSAGSGVPGSGLYLAPGSPSGSDASDSS  
LPVMSGSFVYKPVARS GALLPVQIEPVNDPPTSLSLSLPGAETIESPNLKIEAVQAKPN  
IPPPPPPPVTPPAAIPAIQPPSPVSKVPSPPPQDKVFAFSAEMMAVMQEMIRTEVR  
NYMMGLEQQRFFQHQQHQQNQQHQQQYIQLQIQQQHYNQQQQQQYMQMQQANINEQFRN  
AAMKRIGINRIE

>RMYB61

MDNKKACRRSEEVEVRKGPWTMEEDLILMNYIANHGEVWNTLARSAGLKRGTGKSCRLRW  
LNYLRPDVKRGNITPEEQLLIMDLHAKWGNRWSKIAKYLPGRTDNEIKNFWRTRIQKHIK  
QPANESSSDYQQQQQTNNNSNMANHGNTSQVSLGYGPVDHVVDQMSYSSPACSFPTGME  
HFQAPAFPTPDSNENLWSMEDLWSMHLLHGD

>RMYB62

MRIMIKGGVWKNTEDEILKAAVMKYGKNQWARISSLLVRKSAKQCKARWYEWLDPSIKKT  
EWTREEDEKLLHLAKLMPTQWRTIPIVGRTPSQCLERYEKLLDAACAKDENYEPGDDPR  
KLRPGEIDPNPESKPARPDPVDMDEDEKEMLSEARLANTRGKKAKRKAREKQLEEAR  
LASLQKRRELKAAGIDVRHRKRKRREGIDYNAEIPFEKRPPPGFYDVTEEDRPTLVKFT  
TIEELEGERRDREARLRKQDIANKIAQRQDTPAAIMQANKLNDPETVRKRSKLNLPAP  
QIPDHELDAIAKMGIASDLVGNEELTEGNAATRALLASYAQTPRQGMTPMRTPTPAGK  
QDAIMMEAENQRRLTLSQTPLLGGDNPMLHPSDFSGVTPKKKDIA TPNLLTPSATPGGQ  
GLTPRIGTTPSRDAYSLSMTPKGTMRDELHINEDMDVHSDKLRQADSKKELLSGLKNL  
PQPKNYQIVIQPFAEDEEPEEKIEEDMSDRTAREKTEEEARLQALLKKRSKVLQRELP  
RPPTASLDLIRNSLIRADEDKSSFVPPTLIEQADELIRKELLSLLEHDNTKYPLDEKVAK  
EKKGSKRSAKASAPVPSIDDFEENELKEADELIKNESDVLRVAMGHEDESLEDEYVEAH  
ETCLNDMMYFPTRDGYGLSSVANNMEKIAALQNEFDKVKKEMDNETKKAQKLEQRIKVL  
NGYQMRAGKLTSTQIEATFKQMDTAGTELECFQVLHKQEQLAATHRIGNLWEEVQKQKDL  
NTLQKRYGDLMSELERVQNLVGAYRLQAEKEAENAACKDDDPQVNEINTLDESAPNDGT  
PNDEVLVLDEAANAATNQSIAPDLETSNHEVAENNDVVPVEPEAALDQSVSSDAGNPEP  
AVISDERTSMEVDNIDETRSQQLDVADVHIQPITEHGRDGGASVTGDSFELDSAMDG

>RMYB63

MTRNKTYAEGRKRMPYCKCHWTAEDALLTTFVQAFGAGGWDFIAHRIEGR TAKSCRL  
RWVNHLSPNVCKAPFTEEEQLRLLHLQKEVGNRWSLIVKHFRGR TDNQLKNKFNVLMSR  
KRTMG TSSGSDSHVPLKGGPTGNYYPGFTPYTSTPMNAQASPLISGGSGSGHGKGGTVNK  
LSRPIGANRLNIYYCHMTSHGNPIMSDANSVSHGICLPVAQPQQGAGHKEPQFFDFMGV

GTSE

>RMYB64

CDKVGKKKGPWTCDEDEKLLIAFMLTNGSQCCWRAVPKLAGLLRCGKSCRLRWTNYLRPDL  
KRGLLSQYEEKMVIDLHAQLGNRWSKIASHLPGRTDNEIKNHWNTHIKKLRKMGIDPLT  
HKPLPPPTTTDQLPPQPTELADDQSPNLNEDKTT

>RMYB65

MGRPVAPCCGRIGVKKGPWTPPEEDIILVSYIHEHGPNGWRSVPSNTGLSRCSSKSCRLRWT  
NYLRPGIKRGNFSEHEEKMIHLQALLGNRWAAIASYLPHRTDNDVKNYWNTHLRKKLGK  
QQQQQTQGHVCVDGNNNSSRSKQVAVSKGQWERRLQTDIQTAKQALSEALSFDKSDSAAV  
VDQHPSPTTQTRPIQTSMYAVNADNIARLLENWKSNDSPKLHQAAGSSSESCNNNLQSPSE  
VGFSSNLGMTVMPLSLEKWLFDSEGAQQGDGDFMGIIE

>RMYB66

IPLAIPLSERKKRFLTSCKKIWGMEMLNRCSSGSSSCSSSDSSTVSGRKSERIKGPWSAEE  
DNILTRLVEKYGARNWSLISKYIKGRSGKSCRLRWCNQLSPTVEHRPFTAAEDEAILAAH  
DKYGNRWATIARLLPGRTDNAVKNHWNSTLKRSQLNQKKIG

>RMYB67

LCSNCTNFSAFYSHLIPQIPSIKLSIPFLLLFSNRLSTTQGKMDSADRDAHATPSTWTR  
EDKDFEDGLVEFPDGYPNRWVRIAEMQTKTPAEVERHYAVLLEDVAIDAGLVDLPKYG  
VNNEIELRSSSEADRRNPKSEKPVGTGQRKAAKAWTDDEHKAFLAGLKKYGKGDWKSISR  
YSVRTRSPAQVASHAQYERQEKEVQSKRRSIFDNSIEESS

>RMYB68

SVIIRVFQNCISMAAMAKKVAPEAVPERVKGPWSPEEDELTKLVQQHGARNWTLISQ  
SIPGRSGKSCRLRWCNQLAPEVEHRPFTEEEDEIIVQAHAVHGNKWATIAKMLTGRTDNA  
VKNHWNSTLKRKSYSGRSDGGARLPQALRRLDNRDVSAIIESESSC

>RMYB69

MQEAE LRKGPWLEEDQQLADAVAVLGERRWDALAKASGLKRGKSCRLRWNYLRPNLK  
HGNITAEERTIVELHEKWGNKWSRIAQRLPGRTDNEIKNYWRTYLRKKNHVLEKD

>RMYB3R-1

YKGNWKKIAECFRDRTDVQCLHRWQKVLNPDLVKGPWSKEEDEKIIELVEKYGPKKWT  
IAQNLPGRIGKQCRERWHNHLNPNINRDWQEEEEVILIRAHQMHNKWAELTKYLPGR  
DNAIKNHNWSSVRKLDMMYSSGVLQQLQDVPLVSHSNHLTASSSSRGKQGSSEDDILEGG  
VEVEEASECSQGSIASMSQSINNTIALLGECRTTEDTSLIPFSAEDYRPVVFQEP AFLIP  
EVPCEQGDKFPEHDFSIDWEIFEE

>RMYB3R-2

MEGLKSDDRCLNKDITVDSSSSVSENSSTIALKSTGISSPSSTSPAHKRTSGPIRRAKG  
GWTPEEDATLKKAVAAFRGKCKWKKIAEFFPDRSEVQCLHRWQKVLNPELVKGPWTQEEDD  
KITELVAKYGPTKWSIIAKSLPGRIGKQCRERWHNHLNPHIKKDAWTLEELTLLNAHRV  
HGNKWAELAKLLPGRYLYRAHLETNL

>RMYB3R-3

MEGLKSDDRSLENKDITVDSSSSVSENSSTIALKSTGISSPSSTSPAHKRTSGPIRRAKG  
GWTPEEDATLKKAVAAFRGKCKWKKIAEFFPDRSEVQCLHRWQKVLNPELVKGPWTQEEDD  
KITELVAKYGPTKWSIIAKSLPGRIGKQCRERWHNHLNPHIKKDAWTLEELTLLNAHRV  
HGNKWAELAKLLPGRTDNAIKNHNWSSLLKLDLFYLATGNLPPVSKCVSLNDAAADIHKT  
ASAGELHVGSNKGNSAHLASCETDRLKADDRRTDMPEERSKDYNVASHPQMEPTNPES  
TKHHEAMQSESGAVNPTKESEFEKQHTFGGVGRYNIVKASLRYEMPVHGTLCEPQTFDN  
YGQLDSTLRNVSLMQSQSDTCPATPPTPLFTPPSVRGGNFSAQSPESILRIAASFRNTP  
SILRKRKLDMPKELVVPSEHNHTNGSENAGLQSKTSCADPVSDDEDGVSSNKSPNSSP  
PYRLNFKRTSVHKSVEKQLDFTTITDQEACNNNTKSGDSKVKEARPVTKFVYTRQRRLK  
SSVAKCN
